# Supplementary material
Source: PubMed Central journal article supplement (PMC3314301)
Supplement: NIHMS362192-supplement-Array.pdf [file NIHMS362192-supplement-Array.pdf]

## Supporting Information

Complete Reference 75:

[75] Frisch, M. J.; Trucks, G. W.; Schlegel, H. B.; Scuseria, G. E.; Robb, M. A.; Cheeseman, J. R.; Montgomery, J. A., Jr.; Vreven, T.; Kudin, K. N.; Burant, J. C.; Millam, J. M.; Iyengar, S. S.; Tomasi, J.; Barone, V.; Mennucci, B.; Cossi, M.; Scalmani, G.; Rega, N.; Petersson, G. A.; Nakatsuji, H.; Hada, M.; Ehara, M.; Toyota, K.; Fukuda, R.; Hasegawa, J.; Ishida, M.; Nakajima, T.; Honda, Y.; Kitao, O.; Nakai, H.; Klene, M.; Li, X.; Knox, J. E.; Hratchian, H. P.; Cross, J. B.; Bakken, V.; Adamo, C.; Jaramillo, J.; Gomperts, R.; Stratmann, R. E.; Yazyev, O.; Austin, A. J.; Cammi, R.; Pomelli, C.; Ochterski, J. W.; Ayala, P. Y.; Morokuma, K.; Voth, G. A.; Salvador, J. J.; Dannenberg, V. G.; Zakrzewski, V. G.; Dapprich, S.; Daniels, A. D.; Strain, M. C.; Farkas, O.; Malick, D. K.; Rabuck, A. D.; Raghavachari, K.; Foresman, J. B.; Ortiz, J. V.; Cui, Q.; Baboul, A. G.; Clifford, S.; Cioslowski, J.; Stefanov, B. B.; Liu, G.; Liashenko, A.; Piskorz, P.; Komaromi, I.; Martin, R. L.; Fox, D. J.; Keith, T.; Al-Laham, M. A.; Peng, C. Y.; Nanayakkara, A.; Challacombe, M.; Gill, P. M. W.; Johnson, B.; Chen, W.; Wong, M. W.; Gonzolez, C.; Pople, J. A.; Gaussian, Inc.: Wallingford, CT, 2004.

### A. Experimental Procedures for Synthesis of Substrates

**General Experimental Information:** All reagents were used out of the bottle as purchased from the supplier without further purification unless otherwise specified. Solvents were purified using a commercial solvent filtration system.  $^1\text{H}$  NMR spectra were recorded in  $\text{CDCl}_3$  at 400 and 500 MHz.  $^{13}\text{C}$  NMR spectra were recorded in  $\text{CDCl}_3$  at 75 MHz. Spectra are reported in ppm relative to residual chloroform (7.26 ppm for  $^1\text{H}$  NMRs and 77.0 ppm for  $^{13}\text{C}$  NMRs). IR spectra were obtained neat using a Nicolet-Impact 420 FTIR. High resolution mass spectra were obtained at SUNY, Buffalo mass spectrometry facility on a ThermoFinnigan MAT XL spectrometer. Melting points are reported as uncorrected.

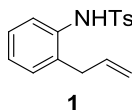

#### ***N*-(2-Allyl-phenyl)-4-methyl-benzenesulfonamide (1)**

*o*-Allylaniline<sup>1</sup> (2.0 g, 15.0 mmol, 1 equiv) was dissolved in of dry  $\text{CH}_2\text{Cl}_2$  (140 mL) and the solution was treated with *p*-toluenesulfonyl chloride (3.4 g, 18.0 mmol, 1.2 equiv) and pyridine (4.9 mL, 60.0 mmol, 4 equiv). The mixture was stirred at room temperature overnight, washed with 1 N HCl (80 mL) and extracted with  $\text{CH}_2\text{Cl}_2$  (3 x 50 mL). The combined organic layers were washed with brine, dried over  $\text{Na}_2\text{SO}_4$  and concentrated *in vacuo*. Flash chromatography of the resulting crude oil on  $\text{SiO}_2$  (10% EtOAc in hexanes) afforded sulfonamide **1** (4.0 g, 95% yield) which matches the reported  $^1\text{H}$  NMR data:<sup>2</sup>  $^1\text{H}$  NMR (500 MHz,  $\text{CDCl}_3$ )  $\delta$  7.61 (d,  $J$  = 8.0 Hz, 2H), 7.40 (d,  $J$  = 8.0 Hz, 1H), 7.23 (d,  $J$  = 8.0 Hz, 2H), 7.19 (m, 1H), 7.13-7.05 (m, 2H), 6.5 (b.s., 1H), 5.80 (m, 1H), 5.12 (dd,  $J$  = 9.0 Hz, 1.5 Hz, 1H), 4.95 (dd,  $J$  = 16.0 Hz, 1.5 Hz, 1H), 3.04 (d,  $J$  = 6.0 Hz, 2H), 2.40 (s, 3H).

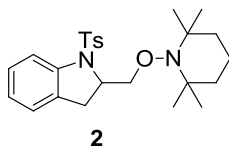

### 2-(2,2,6,6-Tetramethyl-piperidin-1-yloxymethyl)-1-(toluene-4-sulfonyl)-2,3-dihydro-1H-indole (**2**)

The sulfonamide **1** (50.0 mg, 0.174 mmol, 1 equiv), Cu(EH)<sub>2</sub> (91.3 mg, 0.261 mmol, 1.5 equiv), NBu<sub>4</sub>OAc (52.5 mg, 0.174 mmol, 1 equiv), TEMPO (81.5 mg, 0.522 mmol, 3 equiv) and toluene (1.74 mL) were combined in an oven-dried pressure tube equipped with magnetic stir bar. The reaction mixture was heated in an oil bath to 110 °C for 24 h. It was then cooled to room temperature, diluted with ether and filtered through a SiO<sub>2</sub> plug. Removal of the solvent *in vacuo* afforded the crude product. Purification by flash chromatography on SiO<sub>2</sub> (5-10% EtOAc in hexanes gradient) gave compound **2** (74.0 mg, 96% yield) which matches the reported characterization:<sup>3</sup> <sup>1</sup>H NMR (500 MHz, CDCl<sub>3</sub>) δ 7.64 (d, J = 8.0 Hz, 1H), 7.54 (d, J = 8.0 Hz, 2H), 7.14-7.20 (m, 3H), 6.94-7.06 (m, 2H), 4.34 (m, 1H), 4.02 (m, 1H), 3.94 (m, 1H), 2.75-2.85 (m, 2H), 2.35 (s, 3H), 1.38-1.50 (m, 5H), 1.27 (m, 1 H), 1.26 (s, 3H), 1.18 (s, 3H), 0.98 (s, 3H), 0.87 (s, 3H).

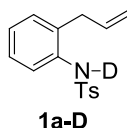

### Synthesis of deuterated substrate (**1a-D**)

The *N*-tosyl-*o*-allylaniline (0.30 g, 1.0 mmol, 1 equiv) was stirred in dry THF (5 mL). The solution was cooled to -78 °C and *n*-butyl lithium (1.6 M in hexanes, 0.45 mmol, 1.3 equiv) was added dropwise via syringe. The reaction mixture was stirred for 15 min and D<sub>2</sub>O (3 mL) was added. The resulting solution was allowed to warm to room temperature and was stirred for another 30 minutes. The mixture was extracted with dry Et<sub>2</sub>O (2 x 3 mL) and the combined organic layer was dried with Na<sub>2</sub>SO<sub>4</sub> and concentrated *in vacuo* to give a brown solid (175 mg, 58% yield). <sup>1</sup>H NMR (500 MHz, CDCl<sub>3</sub>) δ 7.61 (d, J = 8.0 Hz, 2H), 7.40 (d, J = 8.0 Hz, 1H), 7.19-7.23 (m, 3H), 7.13-7.05 (m, 2H), 5.76 (m, 1H), 5.05 (d, J = 9.5 Hz, 1H), 4.90 (d, J = 17.0 Hz, 1H), 3.02 (d, J = 6.0 Hz, 2H), 2.40 (s, 3H).

### Synthesis of deuterated substrate (**1b-D**)

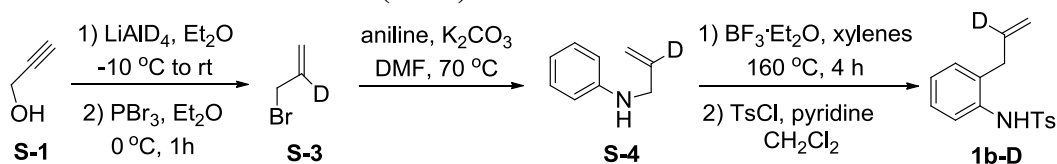

A solution of LiAlD<sub>4</sub> (3.6 g, 85.6 mmol, 1.6 equiv) in dry Et<sub>2</sub>O (285 mL) was cooled to -10 °C and a solution of propargyl alcohol (3.0 g, 53.5 mmol, 1 equiv) in Et<sub>2</sub>O (33 mL) was added via addition funnel over 30 min. The resulting solution was warmed to room temperature and stirred for 14 h. The mixture was cooled to 0 °C and was quenched slowly with H<sub>2</sub>O (4.0 mL). The solution was stirred for another 15 min and then 15% aqueous NaOH solution (4.0 mL) and H<sub>2</sub>O (4.0 mL) were added. The white slurry was filtered through a short pad of Celite and was washed

with Et<sub>2</sub>O (300 mL). The filtrate was concentrated *in vacuo* to give the crude allyl-2-*d*<sub>1</sub> alcohol<sup>4</sup> **S-2** as a yellow oil (3.0 g). <sup>1</sup>H NMR (500 MHz, CDCl<sub>3</sub>) δ 5.22 (s, 1H), 5.09 (s, 1H), 4.08 (s, 2H), 3.0 (br.s, 1H).

The crude allyl-2-*d*<sub>1</sub> alcohol (3.0 g, 50.8 mmol, 1 equiv) was added to a stirring solution of PBr<sub>3</sub> (2.4 mL, 25.5 mmol, 0.5 equiv) in Et<sub>2</sub>O (21 mL) dropwise at 0 °C. The resulting solution was stirred at 0 °C for 1 h and then carefully quenched by the addition of brine (12 mL). The layers were separated and the combined organic extracts were washed with a saturated solution of NaHCO<sub>3</sub>, brine and dried over Na<sub>2</sub>SO<sub>4</sub>. Excess solvent was removed via careful distillation (45-50 °C). The crude allyl-2-*d*<sub>1</sub> bromide **S-3** was obtained as colorless liquid (2.1 g, 32% yield over 2 steps).<sup>5</sup> <sup>1</sup>H NMR (500 MHz, CDCl<sub>3</sub>): δ 5.31 (s, 1H), 5.14 (s, 1H), 3.94 (s, 2H).

Into an oven-dried round bottom flask were added the crude allyl-2-*d*<sub>1</sub> bromide **S-3** (1.5 mL, 12.5 mmol, 1.0 equiv), aniline (4.5 mL, 37.0 mmol, 3.0 equiv), K<sub>2</sub>CO<sub>3</sub> (5.0 g, 37.0 mmol, 3.0 equiv) and DMF (20 mL).<sup>6</sup> The flask was equipped with a stopper and the reaction mixture was heated to 70 °C overnight. The mixture was allowed to cool to room temperature and was washed with water (20 mL). The aqueous phase was extracted with Et<sub>2</sub>O (3 x 20 mL). The combined organic layers were washed with brine, dried with Na<sub>2</sub>SO<sub>4</sub> and concentrated *in vacuo*. Purification by flash chromatography on SiO<sub>2</sub> (10% EtOAc in hexanes) gave compound **S-4** (0.7 g, 45% yield). Data for **S-4**: <sup>1</sup>H NMR (500 MHz, CDCl<sub>3</sub>) δ 7.18 (t, J = 7.5 Hz, 2H), 6.72 (t, J = 7.5 Hz, 1H), 6.64 (d, J = 8.0 Hz, 2H), 5.29 (s, 1H), 5.17 (s, 1H), 3.78 (s, 2H). <sup>13</sup>C NMR (75 Hz, CDCl<sub>3</sub>) δ 148.0, 135.1 (t, J = 23.0 Hz), 129.2, 117.5, 116.1, 112.9, 46.4; HRMS (ESI) calcd for [M]<sup>+</sup> C<sub>9</sub>H<sub>11</sub>DN<sub>1</sub>: 135.1027, found: 135.1022.

To an oven-dried pressure tube were added **S-4** (0.7 g, 5.2 mmol, 1 equiv) and xylenes (13 mL). The solution was cooled to -78 °C and BF<sub>3</sub>·Et<sub>2</sub>O (1.3 mL, 10.4 mmol, 2.0 equiv) was added dropwise. The resulting solution was warmed to room temperature and was heated to 160 °C for 4 h.<sup>7</sup> The reaction mixture was then cooled to room temperature and was placed in an ice water bath and was quenched with 6 mL of 2M NaOH. The organic layer was separated and aqueous layer was extracted with Et<sub>2</sub>O (3 x 10 mL). The organics were combined, dried with Na<sub>2</sub>SO<sub>4</sub>, filtered and concentrated *in vacuo*. Purification by flash chromatography on SiO<sub>2</sub> (10% EtOAc in hexanes) gave *o*-allyl-2-*d*<sub>1</sub> aniline **S-5** (0.5 g, 70% yield). Data for **S-5**: <sup>1</sup>H NMR (500 MHz, CDCl<sub>3</sub>) δ 7.05 (t, J = 8.0 Hz, 2H), 6.75 (t, J = 7.5 Hz, 1H), 6.64 (d, J = 8.0 Hz, 1H), 5.12 (s, 1H), 5.10 s, 1H), 3.66 (br.s, 2H), 3.30 (s, 2H); HRMS (ESI) calcd for [M+H]<sup>+</sup> C<sub>9</sub>H<sub>11</sub>DN<sub>1</sub>: 135.1012, found: 135.1009.

The *o*-allyl-2-*d*<sub>1</sub> aniline **S-5** (0.5 g, 3.7 mmol, 1 equiv) was dissolved in dry CH<sub>2</sub>Cl<sub>2</sub> (20 mL) and the solution was treated with pyridine (1.18 mL, 14.9 mmol, 4 equiv) followed by *p*-toluenesulfonyl chloride (0.85 g, 4.5 mmol, 1.2 equiv). The mixture was stirred at room temperature for 24 h, washed with 1 N HCl (15 ml) and extracted with CH<sub>2</sub>Cl<sub>2</sub> (3 x 15 mL). The combined organic layers were washed with brine, dried over Na<sub>2</sub>SO<sub>4</sub>, and concentrated *in vacuo*. Flash chromatography of the resulting crude compound on SiO<sub>2</sub> (5-10% EtOAc in hexanes) afforded compound **1b-D** as white solid (1.0 g, 96% yield). Data for **1b-D**: m.p. 62-65 °C; <sup>1</sup>H NMR (500 MHz, CDCl<sub>3</sub>) δ 7.61 (d, J = 8.5 Hz, 2H), 7.41 (d, J = 8.5 Hz, 1H), 7.23 (d, J = 8.5 Hz, 2H), 7.19 (m, 1H), 7.13-7.05 (m, 2H), 6.55 (b.s., 1H), 5.11 (s, 1H), 4.93 (s, 1H), 3.00 (s, 2H), 2.39 (s, 3H); <sup>13</sup>C NMR (75 Hz, CDCl<sub>3</sub>) δ 143.7, 136.7, 135.2 (t, J = 24 Hz), 134.9, 131.9, 130.4,

129.5, 127.6, 127.0, 126.2, 124.4, 116.9, 36.0, 21.5; IR (neat)  $\nu$  3266, 3076, 3030, 2967, 2913, 2849, 2243, 1922, 1623, 1596, 1492, 1451, 1401, 1333, 1161, 1089, 1039, 1016, 921, 817, 754, 663  $\text{cm}^{-1}$ ; HRMS (ESI) calcd for  $[\text{M}]^+$   $\text{C}_{16}\text{H}_{16}\text{DO}_2\text{N}_1\text{S}_1$ : 288.1037, found: 288.1036.

**(E)-N-(2,2-dimethyl-5-phenylpent-4-enyl)-4-methylbenzenesulfonamide (9)**

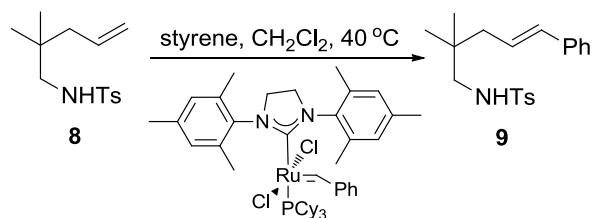

Following the procedure reported by Grubbs and co-workers,<sup>8</sup> a solution of *N*-(2,2-dimethylpent-4-enyl)-4-methylbenzenesulfonamide **8**<sup>9-10</sup> (250 mg, 0.94 mmol, 1 equiv) in  $\text{CH}_2\text{Cl}_2$  (1.0 mL) and styrene (0.43 mL, 3.8 mmol, 4 equiv) were added simultaneously via syringe to a stirring solution of Grubb's second generation catalyst (40 mg, 0.05 mmol, 5.0 mol%) in  $\text{CH}_2\text{Cl}_2$  (1.3 mL). The flask was fitted with a condenser and the solution was heated under reflux for 12 h. The reaction mixture was then concentrated and purified by flash chromatography on  $\text{SiO}_2$  (5-20% EtOAc in hexanes) providing **9** as a white solid (210 mg, 65% yield). Data for **9**: mp 90-93  $^\circ\text{C}$   $^1\text{H}$  NMR (500 MHz,  $\text{CDCl}_3$ )  $\delta$  7.75 (d,  $J = 8.5$  Hz, 2H), 7.23-7.33 (m, 7H), 6.39 (d,  $J = 16.0$  Hz, 1H), 6.13 (m, 1H), 4.39 (s, 1H), 2.76 (d,  $J = 7.0$  Hz, 2H), 2.43 (s, 3H), 2.15 (d,  $J = 7.5$  Hz, 2H), 0.94 (s, 6H);  $^{13}\text{C}$  NMR (75 MHz,  $\text{CDCl}_3$ )  $\delta$  143.2, 137.3, 136.9, 132.9, 129.6, 128.4, 127.0, 126.0, 125.9, 52.7, 42.8, 34.7, 25.0, 21.4; IR (neat, thin film)  $\nu$  3284, 3058, 3021, 2958, 2913, 2867, 1600, 1491, 1451, 1415, 1324, 1256, 1161, 1089, 1066, 1016, 966, 808, 735, 690, 663  $\text{cm}^{-1}$ ; HRMS (ESI) calcd for  $[\text{M}]^+$   $\text{C}_{20}\text{H}_{26}\text{O}_2\text{N}_1\text{S}_1$ : 344.1679, found: 344.1670.

**Procedure for the Diastereoselective Aminoxygenation Reaction (Eq. 12)**

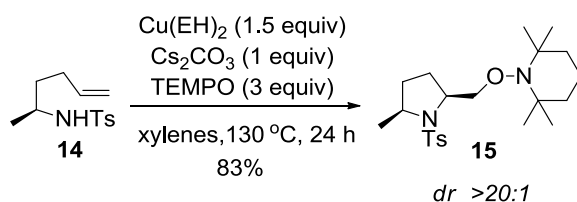

\*81% yield and dr  $>20:1$  with  $\text{Bu}_4\text{NOAc}$  (1 equiv) in place of  $\text{Cs}_2\text{CO}_3$

Following the method we have previously reported,<sup>11</sup> the sulfonamide **14** (40.0 mg, 0.158 mmol, 1 equiv),  $\text{Cu}(\text{EH})_2$  (83.0 mg, 0.237 mmol, 1.5 equiv),  $\text{Cs}_2\text{CO}_3$  (51.0 mg, 0.158 mmol, 1 equiv), TEMPO (74.0 mg, 0.474 mmol, 3 equiv) and xylenes (1.58 mL) were combined in an oven-dried pressure tube equipped with magnetic stir bar. The reaction mixture was heated in an oil bath to  $130\text{ }^\circ\text{C}$  for 24 h. It was then cooled to room temperature, diluted with ether and filtered through a  $\text{SiO}_2$  plug. Removal of the solvent *in vacuo* afforded the crude product. Purification by flash chromatography on  $\text{SiO}_2$  (5% ethyl acetate in hexanes) gave the disubstituted pyrrolidine **15** as white solid in 83% yield (53.5 mg). The reaction of **14** using 1 equiv of  $\text{NBu}_4\text{OAc}$  instead of  $\text{Cs}_2\text{CO}_3$  gave **15** in 81% yield. The *cis* stereochemistry of **15** was determined by *nOe*

experiment.<sup>12</sup> Data for **15** matches the reported characterization:<sup>12</sup>  $[\alpha]_D^{20} = -63.9^\circ$  (c = 1.0, CHCl<sub>3</sub>); <sup>1</sup>H NMR (500 MHz, CDCl<sub>3</sub>) δ 7.72 (d, J = 8.0 Hz, 2H), 7.29 (d, J = 8.0 Hz, 2H), 3.90 (dd, J = 9.0 Hz, 3.5 Hz, 1H), 3.84 (t, J = 8.0 Hz, 1H), 3.72 (m, 1H), 3.62 (m, 1H), 2.41 (s, 3H), 1.91 (m, 1H), 1.67-1.55 (m, 3H), 1.50-1.43 (m, 6H), 1.36 (d, J = 6.0 Hz, 3H), 1.18 (s, 3H), 1.16 (s, 3H), 1.09 (s, 3H), 1.08 (s, 3H); <sup>13</sup>C NMR (75 MHz, CDCl<sub>3</sub>) δ 143.1, 135.0, 129.5, 127.6, 78.6, 60.0, 57.4, 39.6, 32.9, 32.5, 27.3, 22.8, 21.4, 20.2, 17.0.

## B. Competition Experiment

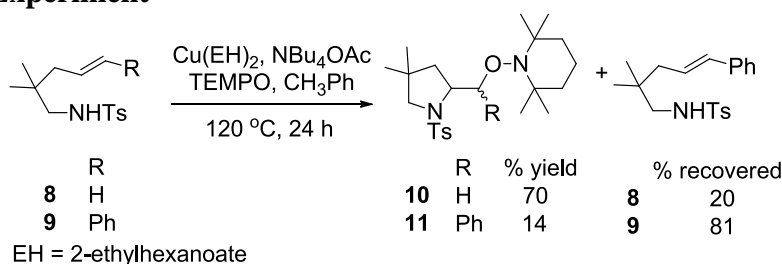

An equimolar amount of **8**<sup>9-10</sup> (20 mg, 0.075 mmol, 1 equiv) and **9** (25.7 mg) was treated with Cu(EH)<sub>2</sub> (26.2 mg, 0.075 mmol, 1.0 equiv), NBu<sub>4</sub>OAc (22.6 mg, 0.075 mmol, 1 equiv), TEMPO (35.2 mg, 0.225 mmol, 3 equiv) and toluene (0.8 mL). The reaction mixture was heated in an oil bath to 120 °C for 24 h, was cooled to room temperature, diluted with Et<sub>2</sub>O and filtered through a SiO<sub>2</sub> plug. Solvent was removed *in vacuo* to afford the crude product. Purification by flash chromatography on SiO<sub>2</sub> (5-20% EtOAc in hexanes gradient) gave the TEMPO adducts **10** (22.3 mg, 70% yield) and **11** (5.1 mg, 14% yield, 4:1 d.r.). The starting olefins **8** (4 mg, 20%) and **9** (21 mg, 81%) were recovered. Spectroscopic data for compound **10** matches the previously reported characterization.<sup>13</sup> <sup>1</sup>H NMR (500 MHz, CDCl<sub>3</sub>) δ 7.71 (d, J = 8.5 Hz, 2H), 7.29 (d, J = 8.0 Hz, 2H), 4.20 (dd, J = 9.0 Hz, 4.0 Hz, 1H), 3.87 (t, J = 8.0 Hz, 1H), 3.69 (m, 1H), 3.11 (ABq, J<sub>AB</sub> = 10.5 Hz, Δ<sub>v</sub><sub>AB</sub> = 21.0 Hz, 2H), 2.42 (s, 3H), 1.77-1.74 (m, 2H), 1.43-1.37 (m, 4H), 1.20 (s, 3H), 1.16 (s, 3H), 1.08 (s, 3H), 1.06 (s, 3H).

The diastereomeric ratio of compound **11** (4:1) was determined by comparing the integration of the proton peaks at 5.56 and 5.47 ppm of the crude <sup>1</sup>H NMR spectrum. Data for **11** (major diastereomer): <sup>1</sup>H NMR (500 MHz, CDCl<sub>3</sub>) δ 7.80 (d, J = 8.5 Hz, 2H), 7.50 (d, J = 8.0 Hz, 2H), 7.27-7.32 (m, 5H), 5.56 (d, J = 4.5 Hz, 1H), 4.42 (m, 1H), 2.93 (d, J = 11.5 Hz, 1H), 2.43 (s, 3H), 2.24 (d, J = 11.0 Hz, 1H), 1.65-1.72 (m, 2H), 1.58-1.60 (m, 2H), 1.47-1.56 (m, 6H), 0.88-1.27 (m, 18H); <sup>13</sup>C NMR (75 MHz, CDCl<sub>3</sub>) δ 143.2, 139.1, 135.3, 129.5, 128.8, 127.7, 127.6, 127.1, 126.6, 86.6, 61.6, 60.7, 40.9, 40.6, 39.5, 36.7, 29.6, 26.4, 25.7, 21.5, 17.1; HRMS (ESI) calcd for [M+H]<sup>+</sup> C<sub>29</sub>H<sub>43</sub>O<sub>3</sub>N<sub>2</sub>S<sub>1</sub>: 499.2989, found: 499.2989.

## C. Mechanistic Analysis of C-O Bond Formation

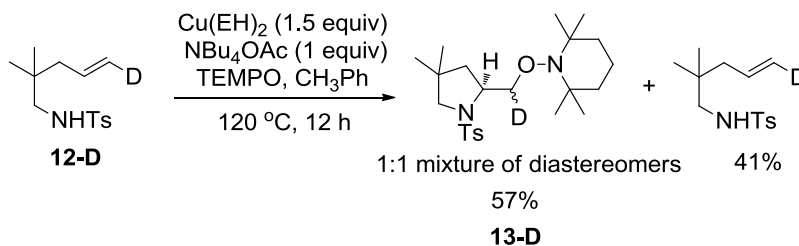

Deuterated substrate **12-D**<sup>3</sup> (20 mg, 0.07 mmol, 1 equiv) was treated with Cu(EH)<sub>2</sub> (39.1 mg, 0.11 mmol, 1.5 equiv), NBu<sub>4</sub>OAc (22.4 mg, 0.07 mmol, 1 equiv), TEMPO (34.9 mg, 0.22 mmol, 3 equiv) and toluene (1.06 mL). The reaction mixture was heated in an oil bath to 120 °C for 12 h, was cooled to room temperature, diluted with Et<sub>2</sub>O and filtered through a SiO<sub>2</sub> plug. Removal of the solvent *in vacuo* afforded the crude product. Purification by flash chromatography on SiO<sub>2</sub>

(5-10% EtOAc in hexanes gradient) gave compound **13-D** (18.1 mg, 57% yield) and the unscrambled starting material (9 mg, 41% yield). Analysis of the crude  $^1\text{H}$  NMR spectrum showed two  $-\text{CHD-OTEMP}$  protons at 4.20 and 3.87 ppm, respectively, each integrating as 0.5 H. This indicates the presence of a 1:1 mixture of diastereomers. Data for compound **13-D**:  $^1\text{H}$  NMR (400 MHz,  $\text{CDCl}_3$ )  $\delta$  7.72 (d,  $J = 8.0$  Hz, 2H), 7.30 (d,  $J = 8.0$  Hz, 2H), 4.17 (m, 0.5H), 3.85 (m, 0.5H), 3.68 (m, 1H), 3.13 (ABq,  $J_{\text{AB}} = 10.4$  Hz,  $\Delta\nu_{\text{AB}} = 18.5$  Hz, 2H), 2.43 (s, 3H), 1.78-1.75 (m, 2H), 1.45-1.42 (m, 4H), 1.20 (s, 3H), 1.16 (s, 3H), 1.08 (s, 3H), 1.06 (s, 6H), 0.55 (s, 3H).  $^{13}\text{C}$  NMR (75 MHz,  $\text{CDCl}_3$ )  $\delta$  143.1, 135.2, 129.4, 127.5, 79.1 (t,  $J = 23.0$  Hz), 79.0 (t,  $J = 22.0$  Hz), 61.4, 59.8, 58.1, 58.0, 44.1, 44.0, 39.6, 37.6, 33.1, 32.8, 26.5, 26.0, 21.5, 20.1, 17.1; IR (neat, thin film)  $\nu$  2965, 2929, 2871, 1598, 1467, 1372, 1349, 1304, 1132, 1094, 1044, 814, 663  $\text{cm}^{-1}$ ; HRMS (ESI) calcd for  $[\text{M}+\text{H}]^+$   $\text{C}_{23}\text{H}_{38}^2\text{HO}_3\text{N}_2\text{S}$ : 424.2739, found: 424.2743.

## D. Kinetics Experiments

**General Information:** All reagents were used out of the bottle as purchased from the supplier without further purification unless otherwise specified. Toluene was purified using a commercial solvent filtration system.  $\text{Cu}(\text{EH})_2$  was purchased from Acros and was purified before use.  $\text{Cu}(\text{EH})_2$  was dissolved in  $\text{Et}_2\text{O}$  and the small amount of undissolved solid was filtered out. The filtrate was dried *in vacuo* and was stored in a dessicator. Reactions were monitored using Varian Prostar High Performance Liquid Chromatography. Data analysis was performed using Microsoft Office Excel 2007 software and data were plotted using SigmaPlot for Window's v. 10.0 (Systat Software, Inc, San Jose, CA).

### General Procedure for Kinetics Experiments

Kinetics experiments were performed in a 16 x 100 mm sealed pressure tube. The solid reactants [substrate **1**,  $\text{Cu}(\text{EH})_2$ ,  $\text{NBu}_4\text{OAc}$ , TEMPO] were combined in an oven-dried pressure tube equipped with magnetic stir bar. Toluene (1.04 mL) was added via micropipette. The reaction mixture was heated to 100 °C using a temperature regulated oil bath and was taken out of the oil bath every 2 minutes. A 20  $\mu\text{L}$  aliquot was collected using gas-tight syringe. Reactions were run up to 80-90% conversion. The aliquots collected were dried under vacuum and the residue was dissolved in 200  $\mu\text{L}$  acetonitrile. The samples were analyzed using HPLC in a Microsorb-MV 100 C8 column by gradient elution (65-100%  $\text{CH}_3\text{CN}$  in  $\text{H}_2\text{O}$ ). Calibration plots for substrate **1** and the TEMPO adduct **2** were used to calculate the concentrations of **1** and **2** as a function of time.



**Order in substrate 1:** The general procedure above was followed using substrate **1** (15 mg, 52  $\mu$ mol),  $\text{Cu}(\text{EH})_2$  (109.6 mg, 312  $\mu$ mol),  $\text{NBu}_4\text{OAc}$  (94.4 mg, 312  $\mu$ mol) and TEMPO (48.9 mg, 312  $\mu$ mol) in toluene (1.04 mL). Three separate kinetics experiments were performed and in each case a plot of  $2[\mathbf{1}]^{0.5}$  versus time gave a straight line ( $r^2 = 0.999$ ), indicating half-order dependence in substrate **1**. A representative plot of  $2[\mathbf{1}]^{0.5}$  versus time is shown in Figure 1. Figure 2 shows the simultaneous disappearance of **1** and appearance of **2** as determined by HPLC analysis.

**Figure 1.** A representative plot of  $2[\mathbf{1}]^{0.5}$  ( $\text{mM}^{0.5}$ ) versus time (min) showing half-order kinetics in substrate **1**

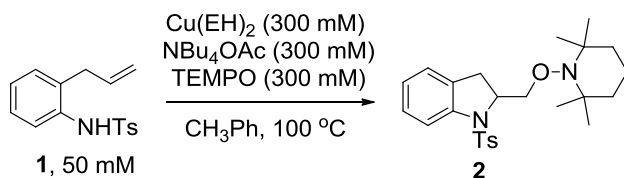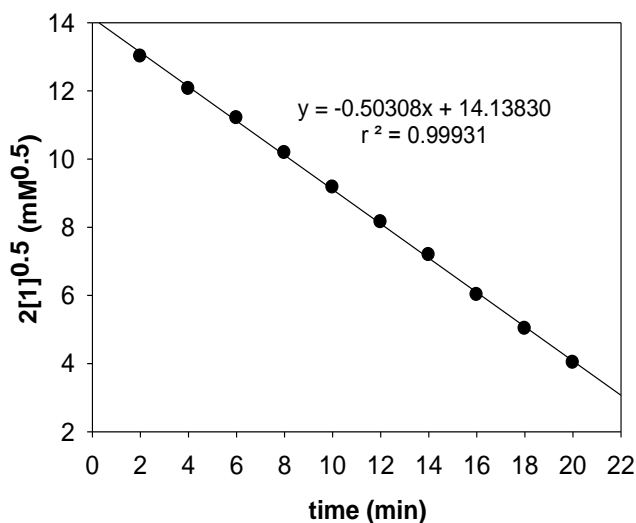

**Figure 2.** The loss of alkene substrate **1** and the appearance of the TEMPO adduct **2**

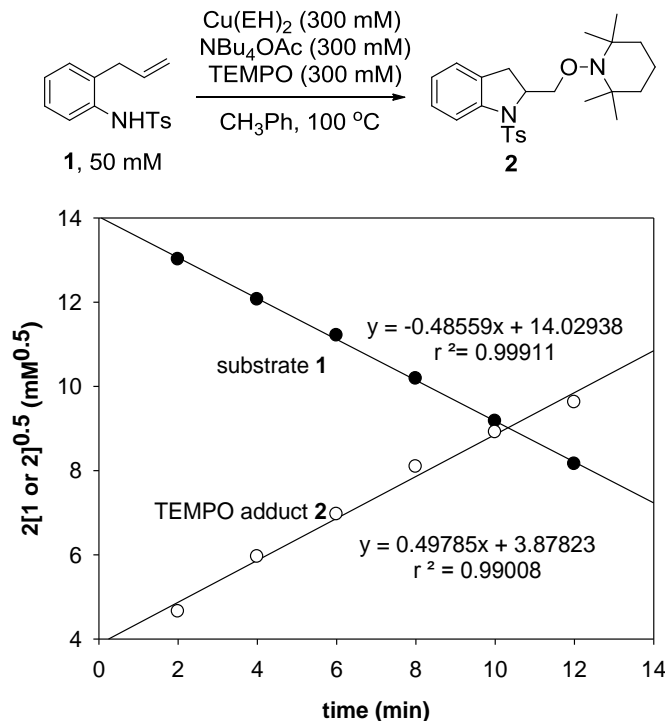

**Effect of  $\text{NBu}_4\text{OAc}$ :** The general procedure above was followed to determine the effect of the concentration of  $\text{NBu}_4\text{OAc}$  in the rate of the reaction. Substrate **1** (15 mg, 52  $\mu\text{mol}$ ),  $\text{Cu}(\text{EH})_2$  (109.6 mg, 312  $\mu\text{mol}$ ), TEMPO (48.9 mg, 312  $\mu\text{mol}$ ) and varying amounts of  $\text{NBu}_4\text{OAc}$  (3.8 - 156.8 mg, 12-520  $\mu\text{mol}$ ) were combined in toluene (1.04 mL) and the disappearance of **1** was monitored. The observed rate constant was determined from the slope of the plot of  $2[\mathbf{1}]^{0.5}$  against time (a representative plot is shown in Figure 3). The reported value of  $k_{obs}$  for each  $[\text{NBu}_4\text{OAc}]$  represents an average of 2-3 kinetics experiments (Table 1). The reported error for the average  $k_{obs}$  is the square root of the sum of the squares of the standard deviation of each kinetics experiment. The data revealed that  $k_{obs}$  is optimum at a 2:1  $[\text{Cu}(\text{EH})_2]: [\text{NBu}_4\text{OAc}]$ . At concentrations higher than 200 mM, the observed rate constant decreases (Figure 4).

**Figure 3.** Plot of  $2[1]^{0.5}$  ( $\text{mM}^{0.5}$ ) versus time (min) with  $[\text{NBu}_4\text{OAc}] = 200 \text{ mM}$  and  $k_{\text{obs}} = 0.586 \pm 0.024 \text{ mM}^{0.5}\text{-min}^{-1}$ .

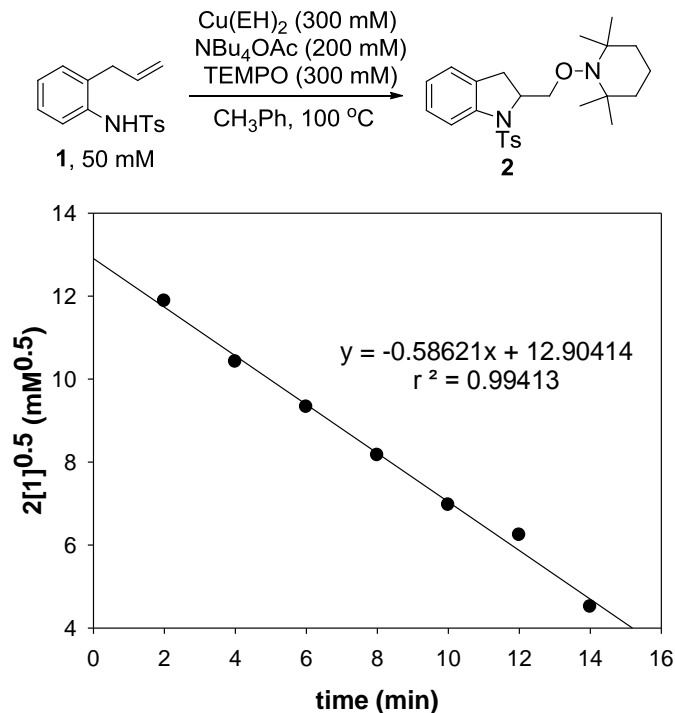

**Table 1.** Kinetic data for effect of the concentration of  $\text{NBu}_4\text{OAc}$  in the rate of the reaction

| Entry | $[\text{NBu}_4\text{OAc}]$<br>(mM) | $k_{\text{obs}}$ ( $\text{mM}^{0.5}\text{-min}^{-1}$ ) | Ave. $k_{\text{obs}}$<br>( $\text{mM}^{0.5}\text{-min}^{-1}$ ) |
|-------|------------------------------------|--------------------------------------------------------|----------------------------------------------------------------|
| 1     | 11.8                               | $0.132 \pm 0.005$                                      | $0.133 \pm 0.010$                                              |
| 2     | 12.7                               | $0.134 \pm 0.009$                                      |                                                                |
| 3     | 25.1                               | $0.177 \pm 0.016$                                      | $0.168 \pm 0.019$                                              |
| 4     | 25.5                               | $0.168 \pm 0.008$                                      |                                                                |
| 5     | 25.9                               | $0.157 \pm 0.007$                                      |                                                                |
| 6     | 49.6                               | $0.254 \pm 0.013$                                      | $0.275 \pm 0.019$                                              |
| 7     | 50.8                               | $0.266 \pm 0.009$                                      |                                                                |
| 8     | 50.5                               | $0.305 \pm 0.011$                                      |                                                                |
| 9     | 100.4                              | $0.377 \pm 0.020$                                      | $0.356 \pm 0.029$                                              |
| 10    | 99.1                               | $0.335 \pm 0.021$                                      |                                                                |
| 11    | 151.0                              | $0.554 \pm 0.025$                                      | $0.611 \pm 0.033$                                              |
| 12    | 150.0                              | $0.668 \pm 0.023$                                      |                                                                |
| 13    | 199.5                              | $0.586 \pm 0.024$                                      | $0.62 \pm 0.05$                                                |
| 14    | 200.0                              | $0.657 \pm 0.041$                                      |                                                                |
| 15    | 305.3                              | $0.544 \pm 0.025$                                      | $0.54 \pm 0.05$                                                |
| 16    | 305.3                              | $0.585 \pm 0.043$                                      |                                                                |
| 17    | 300.0                              | $0.503 \pm 0.004$                                      |                                                                |
| 18    | 500.0                              | $0.232 \pm 0.028$                                      | $0.223 \pm 0.033$                                              |
| 19    | 500.0                              | $0.213 \pm 0.018$                                      |                                                                |

**Figure 4.** Plot of  $k_{obs}$  ( $\text{mM}^{0.5}\text{-min}^{-1}$ ) versus  $[\text{NBu}_4\text{OAc}]$  (mM)

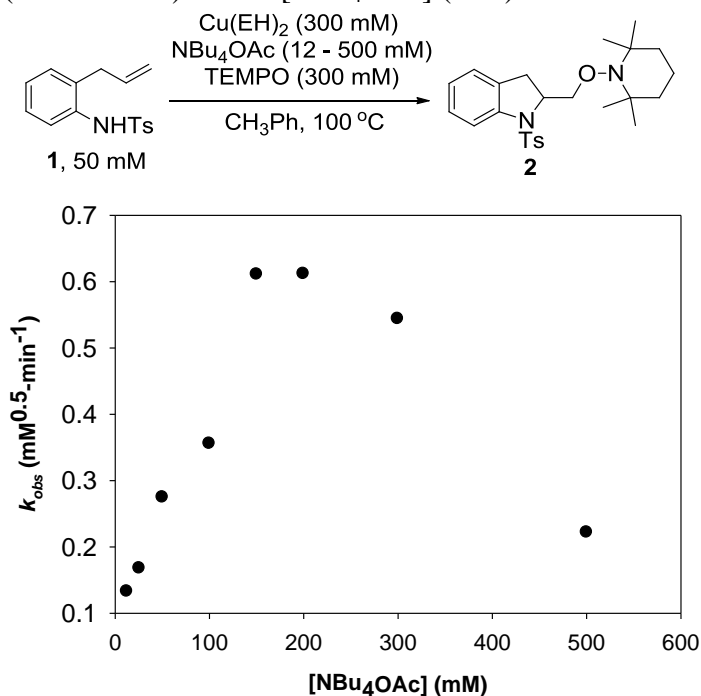

**Order in  $\text{Cu}(\text{EH})_2$ :** The order in  $\text{Cu}(\text{EH})_2$  was determined by performing a series of experiments using different concentrations of  $\text{Cu}(\text{EH})_2$  and  $\text{NBu}_4\text{OAc}$  maintained at 2:1 ratio. The general procedure above was followed using substrate **1** (15 mg, 52  $\mu\text{mol}$ ), TEMPO (48.9 mg, 312  $\mu\text{mol}$ ) and varying amounts of  $\text{NBu}_4\text{OAc}$  (47-156.8 mg, 156-520  $\mu\text{mol}$ ) and  $\text{Cu}(\text{EH})_2$  (109.6-364 mg, 312-1040  $\mu\text{mol}$ ) in toluene (1.04 mL). The disappearance of **1** was monitored and the observed rate constant was determined from the slope of the plot of  $2[\mathbf{1}]^{0.5}$  against time (representative plot is given in Figure 5). The reported value of  $k_{obs}$  for each  $[\text{NBu}_4\text{OAc}]$  is an average of 2 kinetics experiments (kinetic data is given in Table 2). The reported error for the average  $k_{obs}$  is the square root of the sum of the squares of the standard deviation of each kinetics experiment. The half-order dependence in copper was determined from the plot of  $\ln(k_{obs})$  versus  $\ln[\text{Cu}(\text{EH})_2]$  ( $m = 0.52 \pm 0.03$ ) (Figure 6).

**Figure 5.** Plot of  $2[1]^{0.5}$  versus time with  $[\text{Cu}(\text{EH})_2] = 500 \text{ mM}$  and  $[\text{NBu}_4\text{OAc}] = 250 \text{ mM}$  and  $k_{\text{obs}} = 0.842 \pm 0.019 \text{ mM}^{0.5}\text{-min}^{-1}$ .

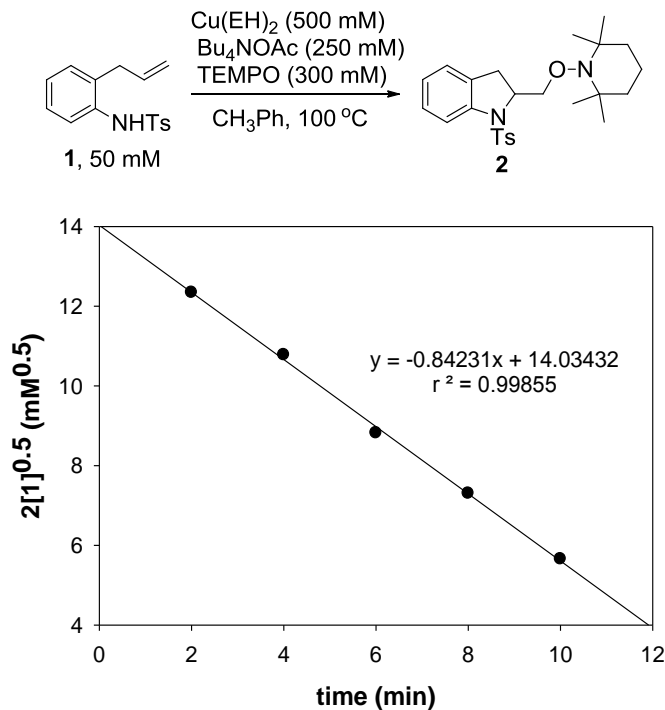

**Table 2.** Kinetic data for determining the order in  $\text{Cu}(\text{EH})_2$ .

| Entry | $[\text{Cu}(\text{EH})_2]$<br>(mM) | $\text{NBu}_4\text{OAc}$<br>(mM) | $k_{\text{obs}}$ ( $\text{mM}^{0.5}\text{-min}^{-1}$ ) | Ave. $k_{\text{obs}}$<br>( $\text{mM}^{0.5}\text{-min}^{-1}$ ) |
|-------|------------------------------------|----------------------------------|--------------------------------------------------------|----------------------------------------------------------------|
| 1     | 303.3                              | 151.0                            | $0.531 \pm 0.027$                                      | $0.599 \pm 0.043$                                              |
| 2     | 299.9                              | 150.0                            | $0.667 \pm 0.034$                                      |                                                                |
| 3     | 399.9                              | 197.9                            | $0.728 \pm 0.027$                                      | $0.727 \pm 0.046$                                              |
| 4     | 399.1                              | 209.0                            | $0.726 \pm 0.037$                                      |                                                                |
| 5     | 500.3                              | 236.0                            | $0.815 \pm 0.037$                                      | $0.829 \pm 0.042$                                              |
| 6     | 505.2                              | 249.6                            | $0.842 \pm 0.019$                                      |                                                                |
| 7     | 601.3                              | 304.9                            | $0.91 \pm 0.09$                                        | $0.912 \pm 0.103$                                              |
| 8     | 602.4                              | 302.7                            | $0.92 \pm 0.05$                                        |                                                                |
| 9     | 800.0                              | 401.6                            | $0.990 \pm 0.017$                                      | $1.00 \pm 0.04$                                                |
| 10    | 797.2                              | 400.3                            | $1.005 \pm 0.037$                                      |                                                                |
| 11    | 996.0                              | 502.9                            | $1.18 \pm 0.09$                                        | $1.16 \pm 0.09$                                                |
| 12    | 994.9                              | 495.7                            | $1.139 \pm 0.012$                                      |                                                                |

**Figure 6.** Plot of  $\ln(k_{obs})$  against  $\ln[\text{Cu}(\text{EH})_2]$  showing half order dependence in copper.

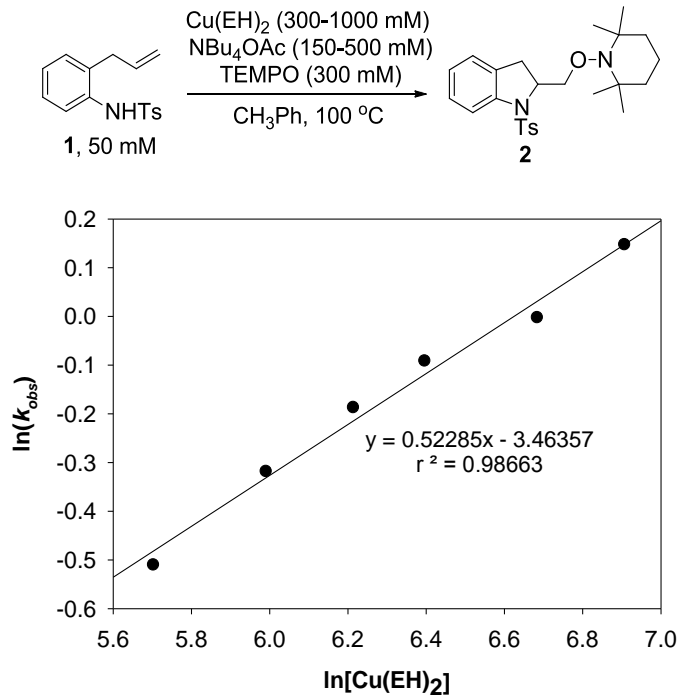

**Order in TEMPO:** The general procedure above was followed to determine the order in TEMPO using **1** (15 mg, 52  $\mu\text{mol}$ ),  $\text{Cu}(\text{EH})_2$  (109.6 mg, 312  $\mu\text{mol}$ ),  $\text{NBu}_4\text{OAc}$  (47 mg, 156  $\mu\text{mol}$ ) and varying amounts of TEMPO (32.5-65.0 mg, 208-416  $\mu\text{mol}$ ) in toluene (1.04 mL). The disappearance of **1** was monitored and the rate constant for each  $[\text{TEMPO}]$  was determined from the slope of the plot of  $2[\mathbf{1}]^{0.5}$  against time (a representative plot is shown in Figure 7). The data from the experiments showed no significant change in the rate constant upon changing the concentration of TEMPO (Table 3), which suggests zero-order dependence in TEMPO.

**Figure 7.** A representative plot of  $2[1]^{0.5}$  against time with  $[\text{TEMPO}] = 300 \text{ mM}$  with  $k_{\text{obs}} = 0.668 \pm 0.023 \text{ mM}^{0.5}\text{-min}^{-1}$ .

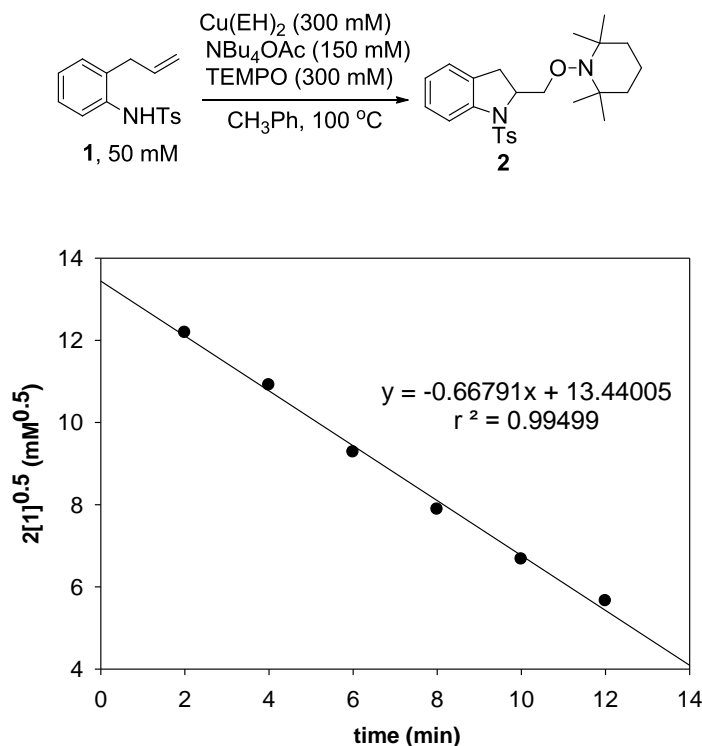

**Table 3.** Kinetic data for determining the order in TEMPO

| Entry | [TEMPO] (mM) | $k_{\text{obs}}$ (mM <sup>0.5</sup> -min <sup>-1</sup> ) | Ave. $k_{\text{obs}}$ (mM <sup>0.5</sup> -min <sup>-1</sup> ) |
|-------|--------------|----------------------------------------------------------|---------------------------------------------------------------|
| 1     | 202.3        | $0.594 \pm 0.03$                                         | $0.62 \pm 0.04$                                               |
| 2     | 200.0        | $0.640 \pm 0.03$                                         |                                                               |
| 3     | 300.0        | $0.554 \pm 0.025$                                        | $0.611 \pm 0.033$                                             |
| 4     | 305.3        | $0.668 \pm 0.023$                                        |                                                               |
| 5     | 400.0        | $0.657 \pm 0.028$                                        | $0.623 \pm 0.032$                                             |
| 6     | 400.0        | $0.589 \pm 0.015$                                        |                                                               |

### Representative Procedure for Measuring the Kinetics of [N-Cu] Intermediate

To a solution of sulfonamide **1** (15 mg, 0.052 mmol, 1 equiv) in toluene (0.502 mL) was added  $n\text{BuLi}$  (34  $\mu\text{L}$ , 1.6 M in hexanes, 0.055 mmol, 1.05 equiv) under argon atmosphere at  $-78^\circ\text{C}$ . The reaction mixture was stirred for 15 min and was then warmed to room temperature. The resulting mixture was added to a solution of  $\text{Cu}(\text{EH})_2$  (18.3 mg, 0.052 mmol, 1 equiv) in toluene (0.502 mL) and was stirred for 15 min. TEMPO (48.8 mg, 0.312 mmol, 3 equiv) was then added to the mixture and was subsequently heated to  $100^\circ\text{C}$  using a temperature regulated oil bath. A 20  $\mu\text{L}$  aliquot was taken every 8 min using gas-tight syringe. The reaction was run up to 80-90% conversion. The aliquots collected were dried under vacuum and the residue was dissolved in

200  $\mu\text{L}$  acetonitrile. The residue which was presumed to contain the amine-copper intermediate was converted to **1** when redissolved in  $\text{CH}_3\text{CN}$  and run in HPLC using  $\text{CH}_3\text{CN}:\text{H}_2\text{O}$  as solvent. The disappearance of **1** was monitored using HPLC in a Microsorb-MV 100 C8 column by gradient elution (65-100%  $\text{CH}_3\text{CN}$  in  $\text{H}_2\text{O}$ ). Kinetic plots are shown in Figure 8 and Table 4 shows the effect of varying the concentration of TEMPO and  $\text{Cu}(\text{EH})_2$  in the  $k_{\text{obs}}$  value.

**Figure 8.** A). Kinetic plot of conversion of [N-Cu] intermediate to **2** with  $[\text{TEMPO}] = 300 \text{ mM}$ . B). Plot of  $\ln[1]$  versus time (min) with  $k_{\text{obs}} = 1.41(\pm 0.07) \times 10^{-2} \text{ min}^{-1}$ .

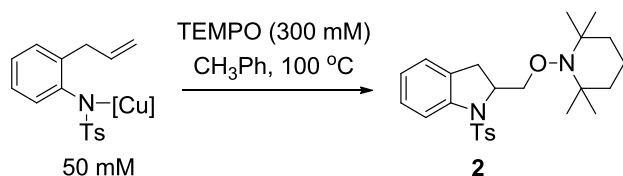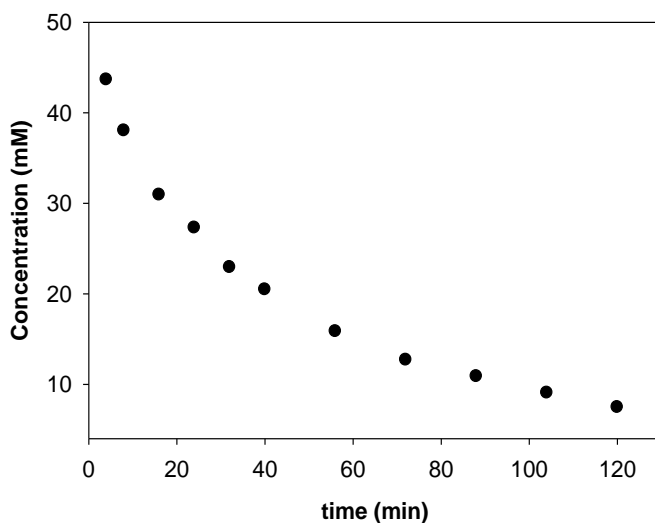

A).

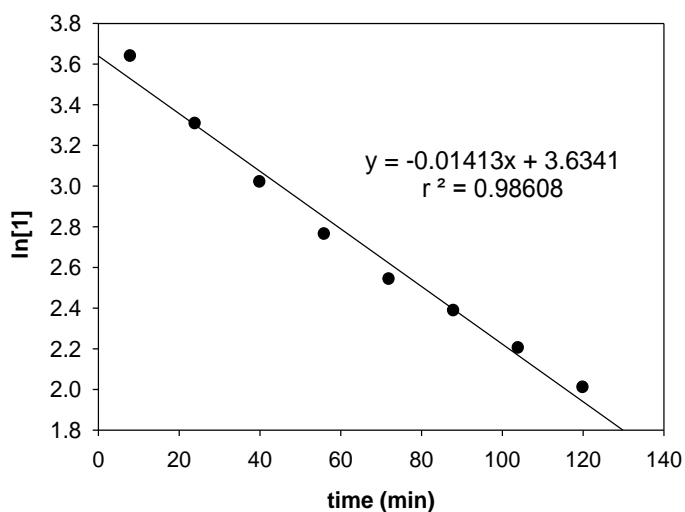

B).



**Table 4.** The effect of varying concentrations of TEMPO and Cu(EH)<sub>2</sub> on the observed rate constant (ave.  $k_{obs} = 1.6 (\pm 0.1) \times 10^{-2} \text{ min}^{-1}$ ).

| Entry | R <sub>2</sub> NLi (mM) | Cu(EH) <sub>2</sub> (mM) | TEMPO (mM)     | $k_{obs}$ (min <sup>-1</sup> )  |
|-------|-------------------------|--------------------------|----------------|---------------------------------|
| 1     | 50                      | 50                       | 100            | $1.28(\pm 0.04) \times 10^{-2}$ |
| 2     | 50                      | 50                       | 200            | $1.78(\pm 0.09) \times 10^{-2}$ |
| 3     | 50                      | 50                       | 300            | $1.41(\pm 0.07) \times 10^{-2}$ |
| 4     | 50                      | 100                      | 200            | $1.76(\pm 0.06) \times 10^{-2}$ |
|       |                         |                          | ave. $k_{obs}$ | $1.6 (\pm 0.1) \times 10^{-2}$  |

### E. Procedure for UV-Vis Spectroscopy

Stock solutions of 40 mM Cu(EH)<sub>2</sub> (35 mg dissolved in 2.5 mL toluene) and 30 mM NBu<sub>4</sub>OAc (27 mg in 3 mL toluene) were prepared. The solutions were sonicated until all solids were dissolved. One mL of 12 mM Cu(EH)<sub>2</sub> solution was prepared by taking 0.3 mL of 40 mM Cu(EH)<sub>2</sub> solution and diluting it with 0.7 mL of toluene. Solutions of 12 mM Cu(EH)<sub>2</sub> were titrated with different concentrations of NBu<sub>4</sub>OAc (6-20 mM). To prepare the solutions using carbonates, 1 mL of 12 mM Cu(EH)<sub>2</sub> was added to 1.95 mg of Cs<sub>2</sub>CO<sub>3</sub> and 0.83 mg of K<sub>2</sub>CO<sub>3</sub> weighed in separate vials. The mixtures were sonicated and the undissolved solids were carefully removed by pipetting out the liquid prior to spectroscopy. Absorption spectra were obtained using UVIKON XL spectrophotometer (Figure 9).

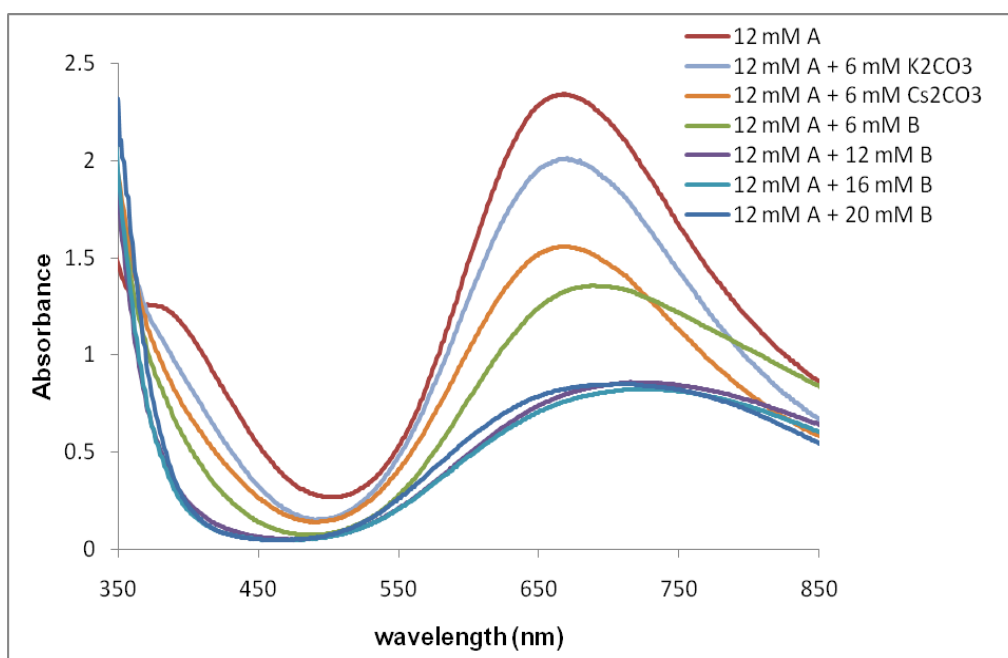

**Figure 9.** UV-Vis spectra of a series of Cu(EH)<sub>2</sub> (A) solution titrated with increasing amount of NBu<sub>4</sub>OAc (B) and 6 mM of K<sub>2</sub>CO<sub>3</sub> and Cs<sub>2</sub>CO<sub>3</sub>.

## F. Electron Paramagnetic Resonance (EPR) Measurements

Stock solutions of 5 mM each of  $\text{Cu}(\text{EH})_2$ ,  $\text{Bu}_4\text{NOAc}$  and sulfonamide **1** in toluene were prepared. One mL of solution A was prepared by taking 100  $\mu\text{L}$  of 5 mM  $\text{Cu}(\text{EH})_2$ , 50  $\mu\text{L}$  of 5 mM  $\text{Bu}_4\text{NOAc}$  and 850  $\mu\text{L}$  of toluene. One mL of solution B was prepared by taking 100  $\mu\text{L}$  each of 5 mM  $\text{Cu}(\text{EH})_2$  and 5 mM of sulfonamide **1**, 50  $\mu\text{L}$  of 5 mM  $\text{Bu}_4\text{NOAc}$  and 750  $\mu\text{L}$  of toluene. Solution B was heated to 50  $^\circ\text{C}$  for 15 min prior to EPR analysis. Solution C was prepared by taking 100  $\mu\text{L}$  each of 5 mM  $\text{Cu}(\text{EH})_2$  and 5 mM of sulfonamide **1** (deprotonated by  $n\text{BuLi}$ ) and 800  $\mu\text{L}$  of toluene. EPR spectra were obtained using a Bruker EMX spectrometer operating at 9.85 GHz (X-band). Spectra were recorded in frozen glass of toluene at 100 K (Figure 10). Spectra are reported from 12 scans with time constant of 1.28 s, modulation amplitude of 1.0 G, and microwave power of 20 dB. EPR parameters were obtained using the software Bruker Xenon 1.1b.42 (Bruker Biospin Corporation, Billerica, MA USA).

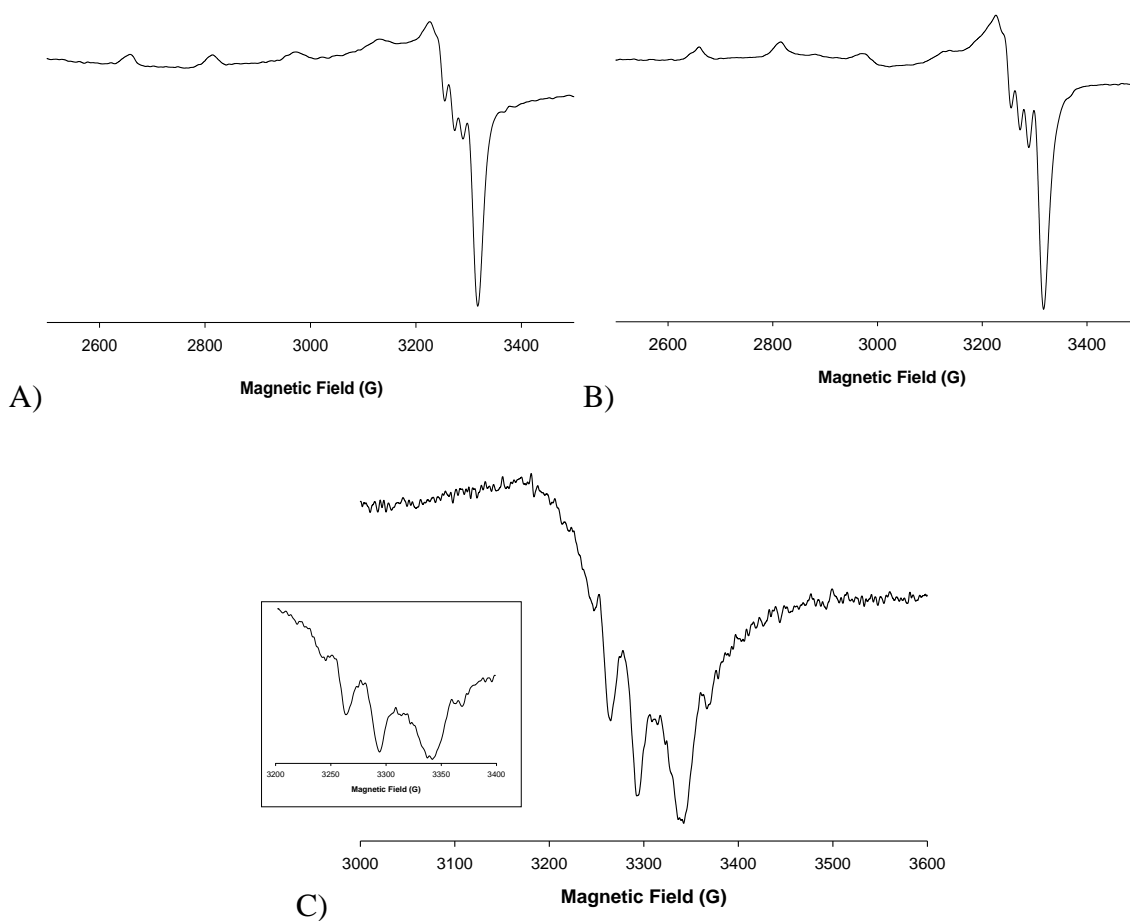

**Figure 10.** EPR spectra of solutions of A) 2:1 mixture of  $\text{Cu}(\text{EH})_2$  and  $\text{Bu}_4\text{NOAc}$ , B) 2:2:1 of sulfonamide **1**: $\text{Cu}(\text{EH})_2$ : $\text{Bu}_4\text{NOAc}$  (heated at 50  $^\circ\text{C}$  for 15 min) and C) 1:1 mixture of  $\text{Cu}(\text{EH})_2$  and sulfonamide **1** (deprotonated with  $n\text{BuLi}$ ) in frozen glass of toluene at 100 K.

## G. Kinetic Isotope Effect (KIE)

**Primary Kinetic Isotope Effect:** The primary kinetic isotope effect was determined by studying the rate of reactions of substrate **1** and **1a-D**. The general aminooxygenation procedure (above) was followed using substrate **1** or **1a-D** (0.05 mmol, 1 equiv), Cu(EH)<sub>2</sub> (36.4 mg, 0.10 mmol, 2 equiv), NBu<sub>4</sub>OAc (15.7 mg, 0.05 mmol, 1 equiv), TEMPO (24.2 mg, 0.15 mmol, 3 equiv) and toluene (1.04 mL). Reactions were conducted at 100 °C and the reported value of  $k_{obs}$  represents an average of two unique kinetics experiments.

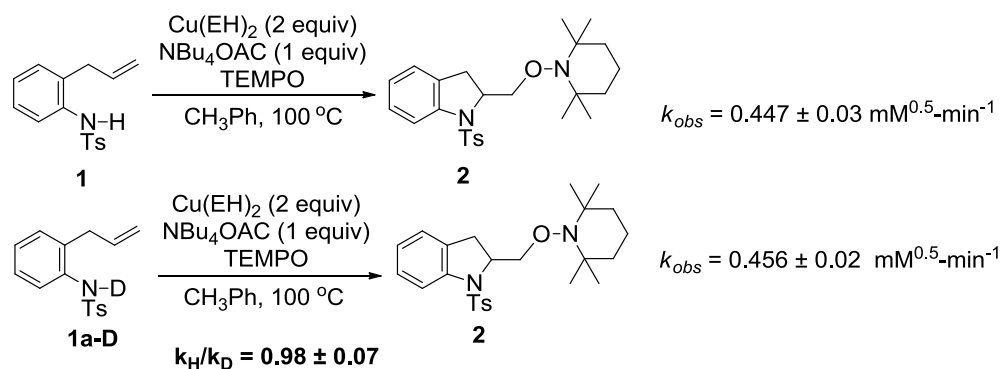

## Secondary Kinetic Isotope Effect

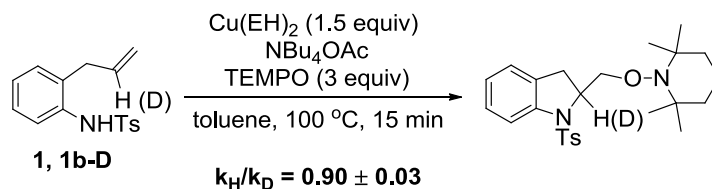

A mixture of substrates **1** (25.0 mg) and **1b-D** (25.0 mg) was dissolved in toluene (3.46 mL). One mL aliquot was taken from this solution and was subjected to mass spectrometry to determine the isotopic ratio prior to reaction ( $R_o$ ) (representative data is given in Table 5). The remaining solution was treated with Cu(EH)<sub>2</sub> (64 mg, 0.18 mmol, 1.5 equiv), NBu<sub>4</sub>OAc (36.6 mg, 0.12 mmol, 1 equiv) and TEMPO (57.2 mg, 0.37 mmol, 3 equiv) and was heated to 100 °C for 15 min. The remaining mixture of starting olefins (**1** and **1b-D**) was isolated by flash chromatography (5% EtOAc in hexanes) and the isotopic ratio was determined by mass spectroscopy ( $R$ ). Fractional conversion ( $F$ ) which was corrected ( $F_c$ ) using the equation given in Table 6 was determined by HPLC analysis. Six separate reactions were performed and kinetic isotope effect was determined for each case. The reported KIE is the average of these 6 experiments ( $0.90 \pm 0.03$ ).<sup>14-15</sup>

**Table 5.** Representative data of isotopic ratio as determined by mass spectrometry

| Trial | R <sub>o</sub> | R           | R/R <sub>o</sub> |
|-------|----------------|-------------|------------------|
| 1     | 1.0            | 0.84        |                  |
| 2     | 1.0            | 0.82        |                  |
| 3     | 1.0            | 0.84        |                  |
| 4     | 0.96           | 0.80        |                  |
| Ave   | 0.99 ± 0.02    | 0.82 ± 0.01 | 0.83 ± 0.02      |

**Table 6.** Calculated KIE data and errors<sup>14-15</sup>

$$F_c = 1 - \frac{(1-F)(1+R_o)}{1+R}$$

$$KIE = \frac{k_H}{k_D} = \frac{\ln(1-F)}{\ln[(1-F)(R/R_o)]}$$

$$\Delta KIE = \frac{-(\Delta R/R_o)\ln(1-F)}{(R/R_o)\ln^2[(1-F)(R/R_o)]}$$

| Entry | 1-F    | 1-F <sub>c</sub> | R/R <sub>o</sub> | ΔR/R <sub>o</sub> | KIE    | ΔKIE   |
|-------|--------|------------------|------------------|-------------------|--------|--------|
| 1     | 0.2117 | 0.2310           | 0.8323           | 0.02              | 0.8887 | 0.0129 |
| 2     | 0.2547 | 0.2722           | 0.8677           | 0.03              | 0.9017 | 0.0216 |
| 3     | 0.2541 | 0.2727           | 0.8622           | 0.02              | 0.8976 | 0.0144 |
| 4     | 0.2086 | 0.2267           | 0.8361           | 0.03              | 0.8924 | 0.0192 |
| 5     | 0.2119 | 0.2285           | 0.8569           | 0.04              | 0.9053 | 0.0259 |
| 6*    | 0.1964 | 0.2128           | 0.8466           | 0.04              | 0.9028 | 0.0248 |
|       |        |                  |                  | Ave. KIE          | 0.8971 | 0.03   |

\*Reaction was run using a 2:1 ratio between Cu(EH)<sub>2</sub> and NBu<sub>4</sub>OAc.

## H. References

- (1) Bennasar, M. L.; Roca, T.; Monerri, M.; García-Díaz, D. *J. Org. Chem.* **2006**, *71*, 7028-7034.
- (2) Hegedus, L. S.; McKearin, J. M. *J. Am. Chem. Soc.* **1982**, *104*, 2444-2451.
- (3) Sherman, E. S.; Fuller, P. H.; Kasi, D.; Chemler, S. R. *J. Org. Chem.* **2007**, *72*, 3896-3905.
- (4) Yip, K.-T.; Li, J.-H.; Lee, O.-Y.; Yang, D. *Org. Lett.* **2005**, *7*, 5717-5719.
- (5) Tekavec, T. N.; Louie, J. *Tetrahedron* **2008**, *64*, 6870-6875.
- (6) Muñiz, K.; Hövelmann, C. H.; Streuff, J. *J. Am. Chem. Soc.* **2007**, *130*, 763-773.
- (7) Nicolaou, K. C.; Roecker, A. J.; Hughes, R.; van Summeren, R.; Pfefferkorn, J. A.; Winssinger, N. *Bioorg. & Med. Chem.* **2003**, *11*, 465-476.
- (8) Chatterjee, A. K.; Choi, T.-L.; Sanders, D. P.; Grubbs, R. H. *J. Am. Chem. Soc.* **2003**, *125*, 11360-11370.
- (9) Michael, F. E.; Cochran, B. M. *J. Am. Chem. Soc.* **2006**, *128*, 4246-4247.
- (10) Bender, C. F.; Widenhoefer, R. A. *J. Am. Chem. Soc.* **2005**, *127*, 1070-1071.
- (11) Paderes, M. C.; Chemler, S. R. *Org. Lett.* **2009**, *11*, 1915-1918.
- (12) Paderes, M. C.; Chemler, S. R. *Eur. J. Org. Chem.* **2011**, 3679-3684.
- (13) Fuller, P. H.; Kim, J.-W.; Chemler, S. R. *J. Am. Chem. Soc.* **2008**, *130*, 17638-17639.
- (14) Melander, L.; Saunders, W. H., Jr. *Reaction Rates of Isotopic Molecules*; John Wiley and Sons, 1979.
- (15) Singleton, D. A.; Thomas, A. A. *J. Am. Chem. Soc.* **1995**, *117*, 9357-9358.

# I. $^1\text{H}$ and $^{13}\text{C}$ NMR spectra for all new compounds

mcp-III-180crude  
Pulse Sequence: s2pu1  
Solvent: CDCl3  
Ambient temperature  
INOVA-500 "tocsy.chem.buffalo.edu"  
Relax. delay 2.000 sec  
Pulse 39.7 degrees  
Acq. time 1.891 sec  
Width 10000.0 Hz  
16 repetitions  
OBSERVE H1, 499.8984048 MHz  
DATA PROCESSING  
Line broadening 0.7 Hz  
FT size 65556  
Total time 1 min, 18 sec

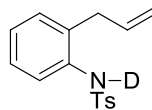

1a-D

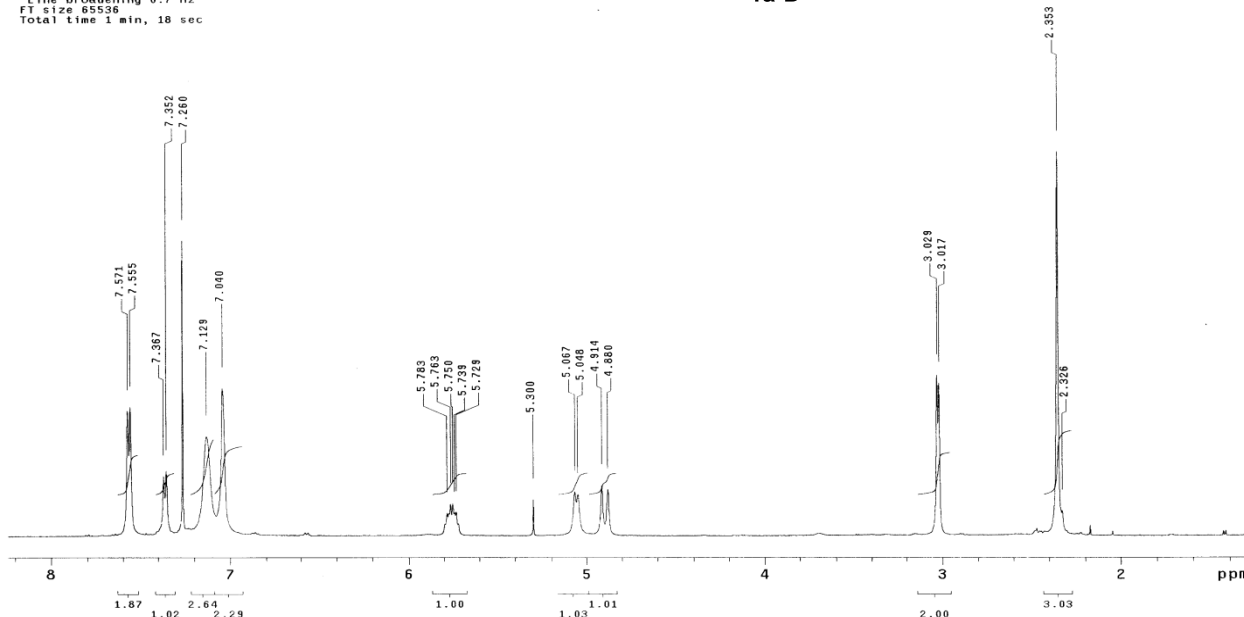

mcp-IV-257

Sample Name:  
Data Collected on:  
Chemmm500.chem.buffalo.edu-inova500  
Archive directory:  
Sample directory:  
Fidfile: PROTON

Pulse Sequence: PROTON (s2pu1)  
Solvent: cdc13  
Data collected on: Mar 23 2011

Operator: Chemler  
Relax. delay 1.000 sec  
Pulse 45.0 degrees  
Acq. time 2.048 sec  
Width 8000.0 Hz  
8 repetitions  
OBSERVE H1, 499.8984055 MHz  
DATA PROCESSING  
FT size 32768  
Total time 0 min 24 sec

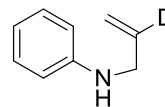

S-4

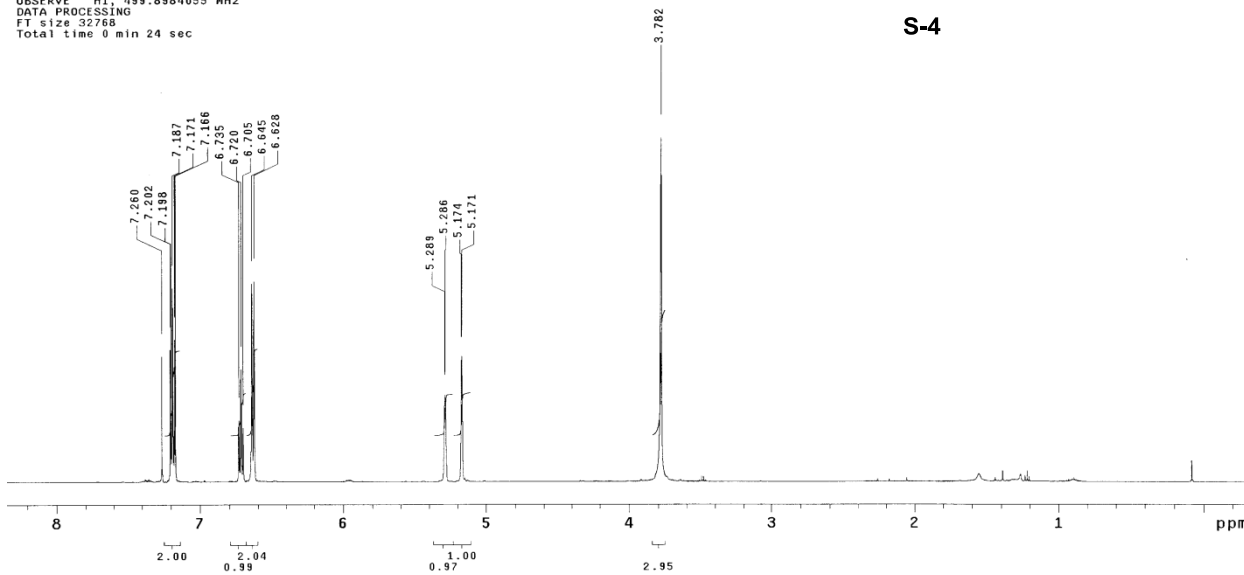

mcp-IV-257CNMR

Sample Name:  
Data Collected on:  
roesy.chem.buffalo.edu-mercury300  
Archive directory:  
Sample directory:  
FidFile: mcp-IV-257CNMR  
Pulse Sequence: CARBON (s2pul)  
Solvent: cdcl3  
Data collected on: Mar 23 2011  
Temp. 25.0 C / 298.1 K  
Operator: Chemler  
Relax. delay 1.000 sec  
Pulse 45.0 degrees  
Acq. time 0.868 sec  
Width 18867.9 Hz  
2776 repetitions  
OBSERVE C13, 75.4536375 MHz  
DECOUPLE H1, 300.0754430 MHz  
Power 38 dB  
continuously on  
WALTZ-16 modulated  
DATA PROCESSING  
Line broadening 0.5 Hz  
FT size 32768  
Total time 16 hr, 6 min

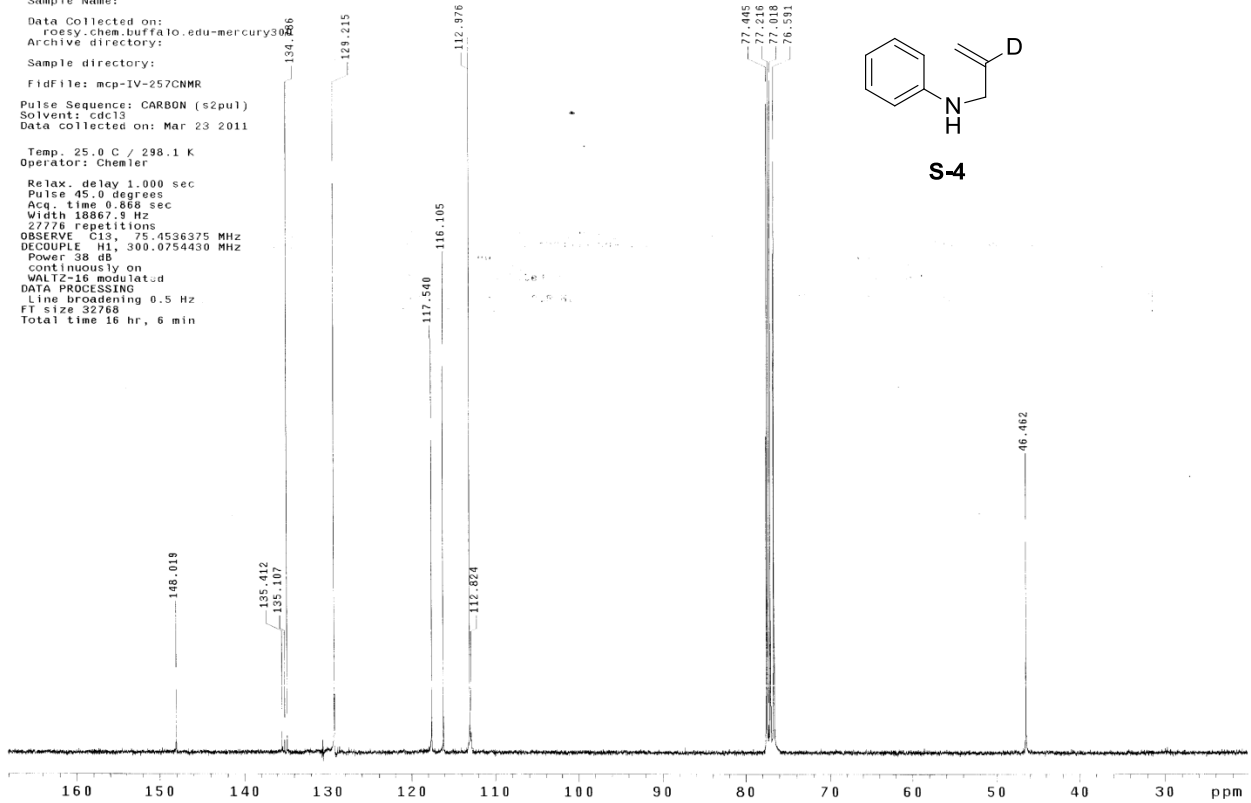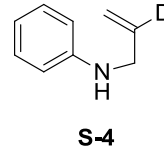

mcp-III-65

Pulse Sequence: s2pul  
Solvent: CDCl3  
Ambient temperature  
INOVA-500 "tocsy.chem.buffalo.edu"  
Relax. delay 2.000 sec  
Pulse 39.7 degrees  
Acq. time 1.891 sec  
Width 10000.0 Hz  
16 repetitions  
OBSERVE H1, 499.8984021 MHz  
DATA PROCESSING  
Line broadening 0.7 Hz  
FT size 65536  
Total time 1 min, 18 sec

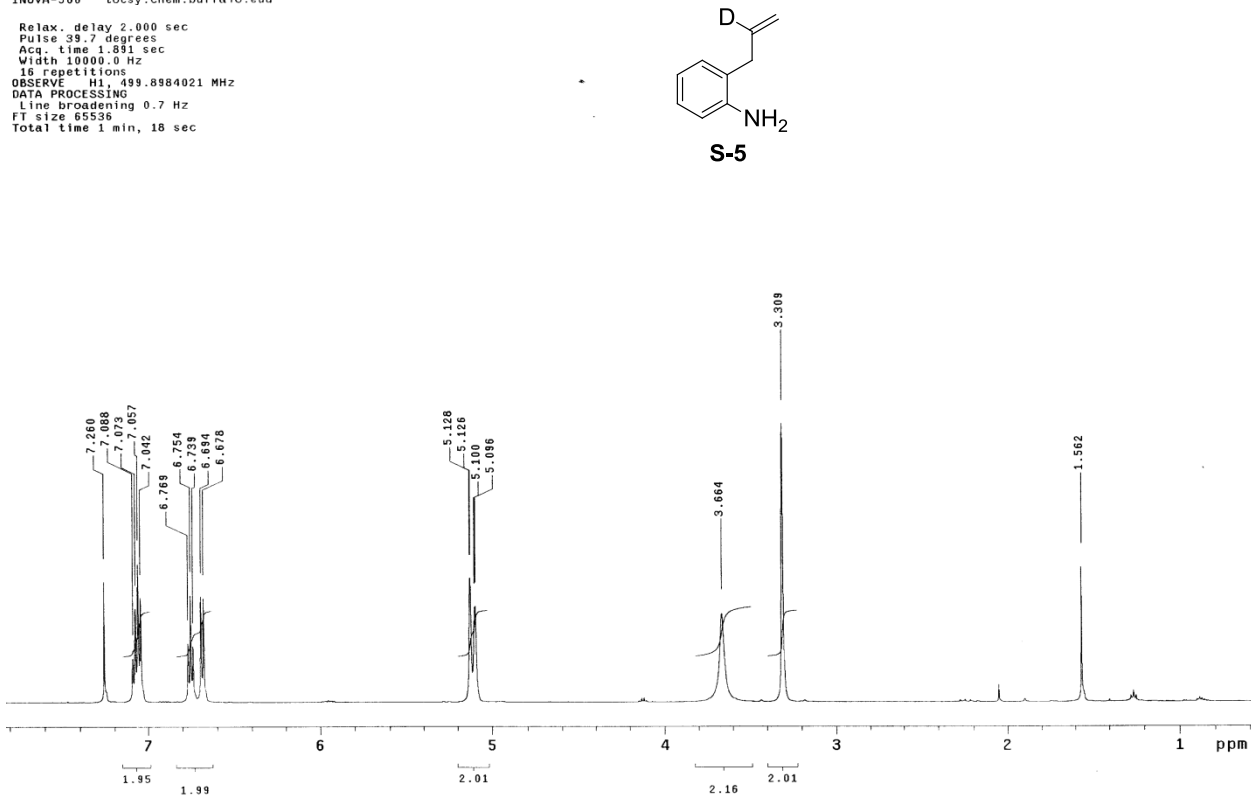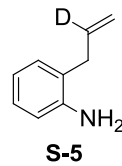

mcp-substrate-d  
 Sample Name:  
 Data Collected on: chemmr500.chem.buffalo.edu-inova500  
 Archive directory:  
 Sample directory:  
 FidFile: PROTON  
 Pulse Sequence: PROTON (s2pu1)  
 Solvent: cdcl3  
 Data collected on: Oct 13 2010  
 Operator: Chemler  
 Relax. delay 1.000 sec  
 Pulse 45.0 degrees  
 Acq. time 2.048 sec  
 Width 8000.0 Hz  
 8 repetitions  
 OBSERVE H1, 499.8984201 MHz  
 DATA PROCESSING  
 FT size 32768  
 Total time 0 min 25 sec

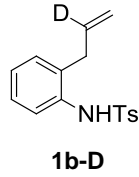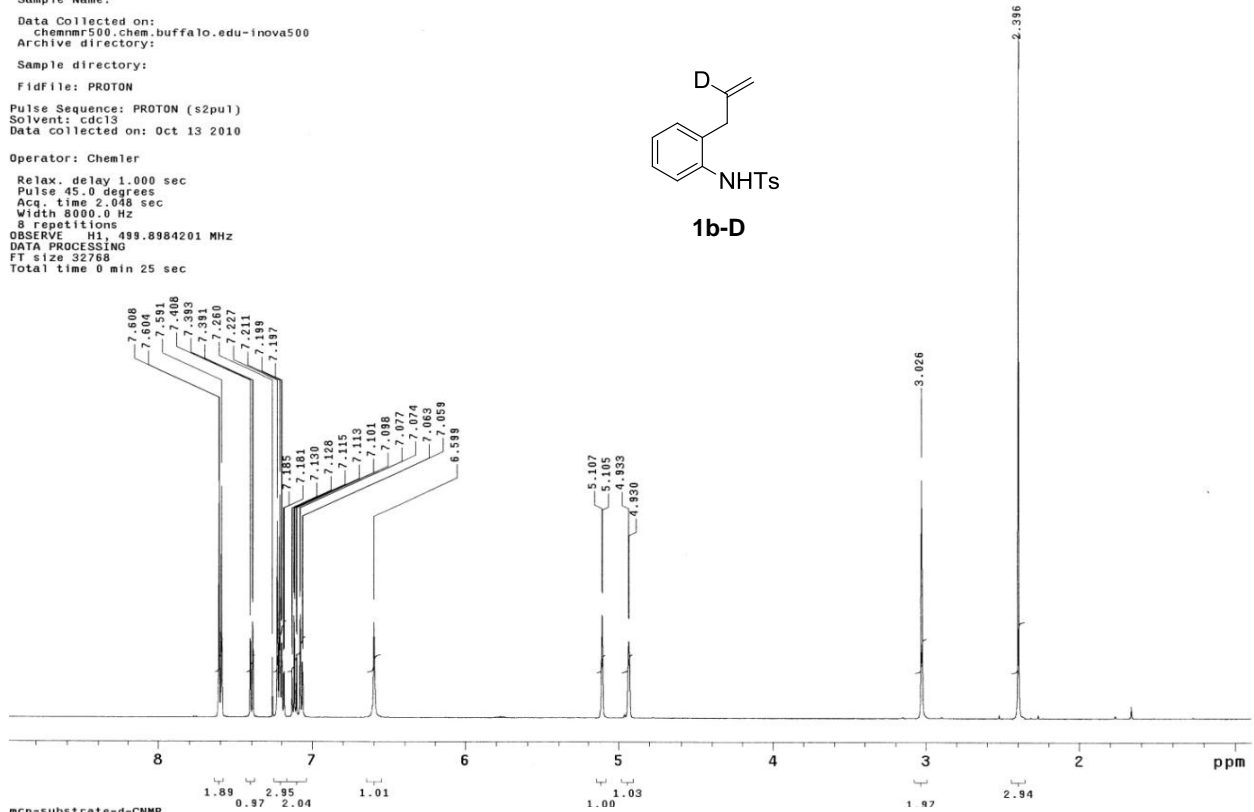

mcp-substrate-d-CNMR  
 Sample Name:  
 Data Collected on: roesy.chem.buffalo.edu-mercury300  
 Archive directory:  
 Sample directory:  
 FidFile: CARBON  
 Pulse Sequence: CARBON (s2pu1)  
 Solvent: cdcl3  
 Data collected on: Oct 13 2010  
 Temp. 21.9 C / 295.1 K  
 Operator: Chemler  
 Relax. delay 1.000 sec  
 Pulse 45.0 degrees  
 Acq. time 0.888 sec  
 Width 18867.9 Hz  
 1024 repetitions  
 OBSERVE C13, 75.4536412 MHz  
 DECOUPLE H1, 300.0754430 MHz  
 Power 38 dB  
 Continuously on  
 WALTZ-16 modulated  
 DATA PROCESSING  
 Line broadening 0.5 Hz  
 FT size 32768  
 Total time 3 hr, 13 min

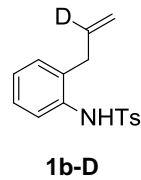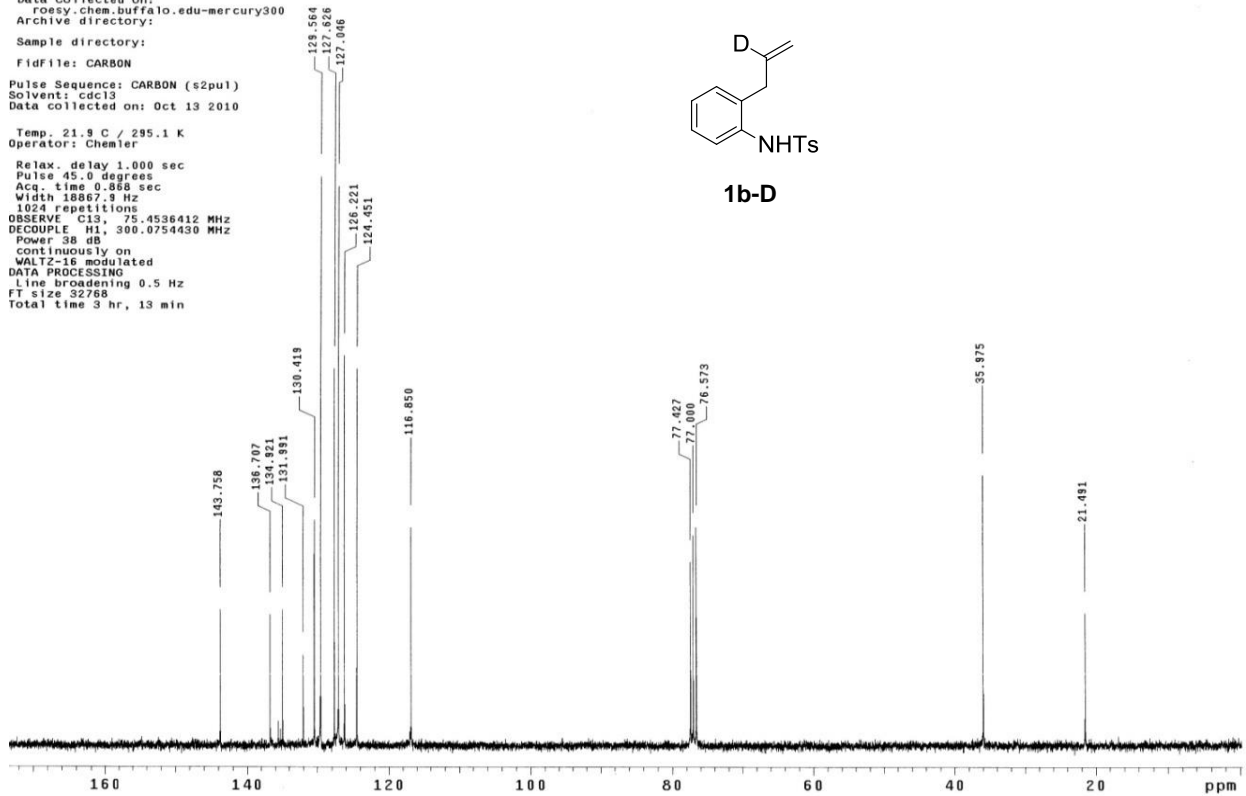



mcp-III-167-2  
Pulse Sequence: s2pu1  
Solvent: CDCl3  
Ambient temperature  
INOVA-500 "tocsy.chem.buffalo.edu"

Relax. delay 2.000 sec  
Pulse 39.7 degrees  
Acq. time 1.891 sec  
Width 10000.0 Hz  
16 repetitions  
OBSERVE H1 499.8983908 MHz  
DATA PROCESSING  
Line broadening 0.7 Hz  
FT size 65536  
Total time 1 min, 18

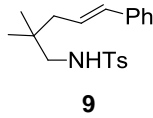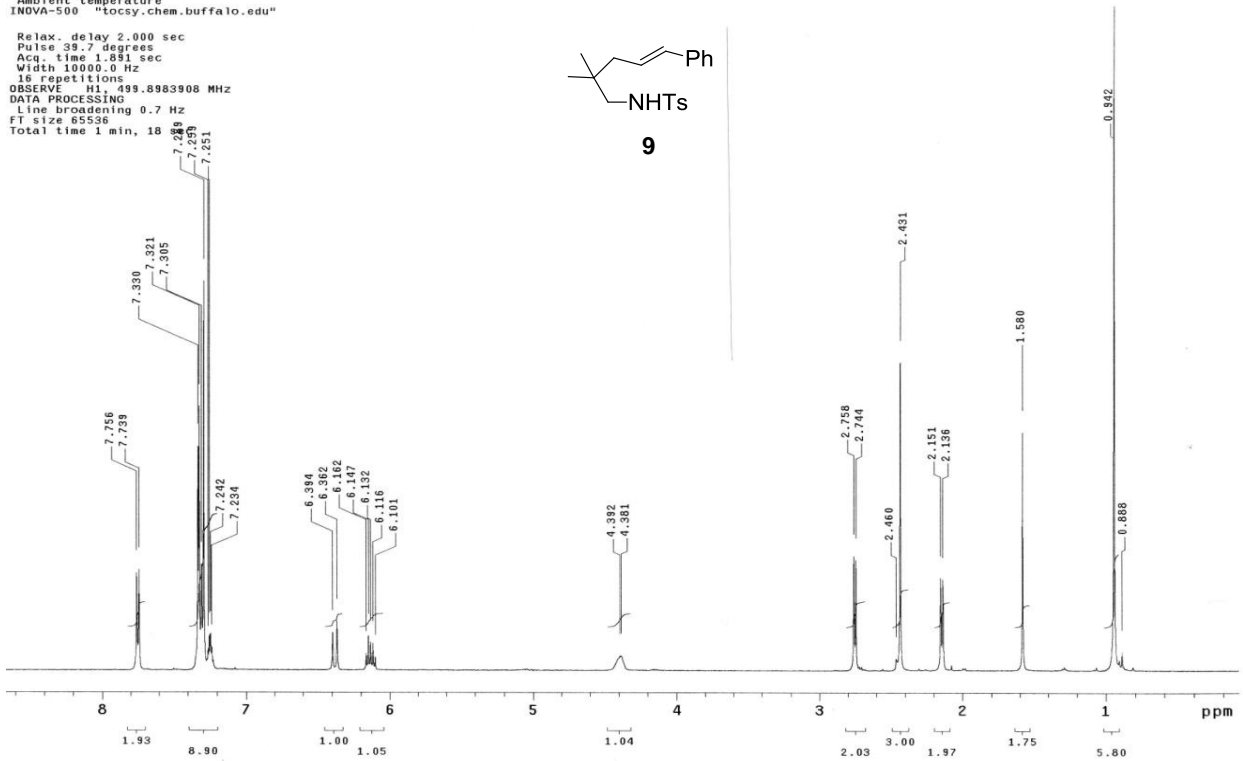

mcp-III-167CNMR  
Pulse Sequence: s2pu1  
Solvent: CDCl3  
Ambient temperature  
GENINI-300 "rossy.chem.buffalo.edu"

Pulse 35.5 degrees  
Acq. time 1.708 sec  
Width 18761.7 Hz  
4256 repetitions  
OBSERVE C13 75.4536618 MHz  
DECOUPLE H1 300.0754431 MHz  
Power 1023 dB  
Continuously on  
WALTZ-16 modulated  
DATA PROCESSING  
Line broadening 1.0 Hz  
FT size 65536  
Total time 9 hr, 55 min, 59 sec

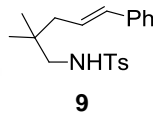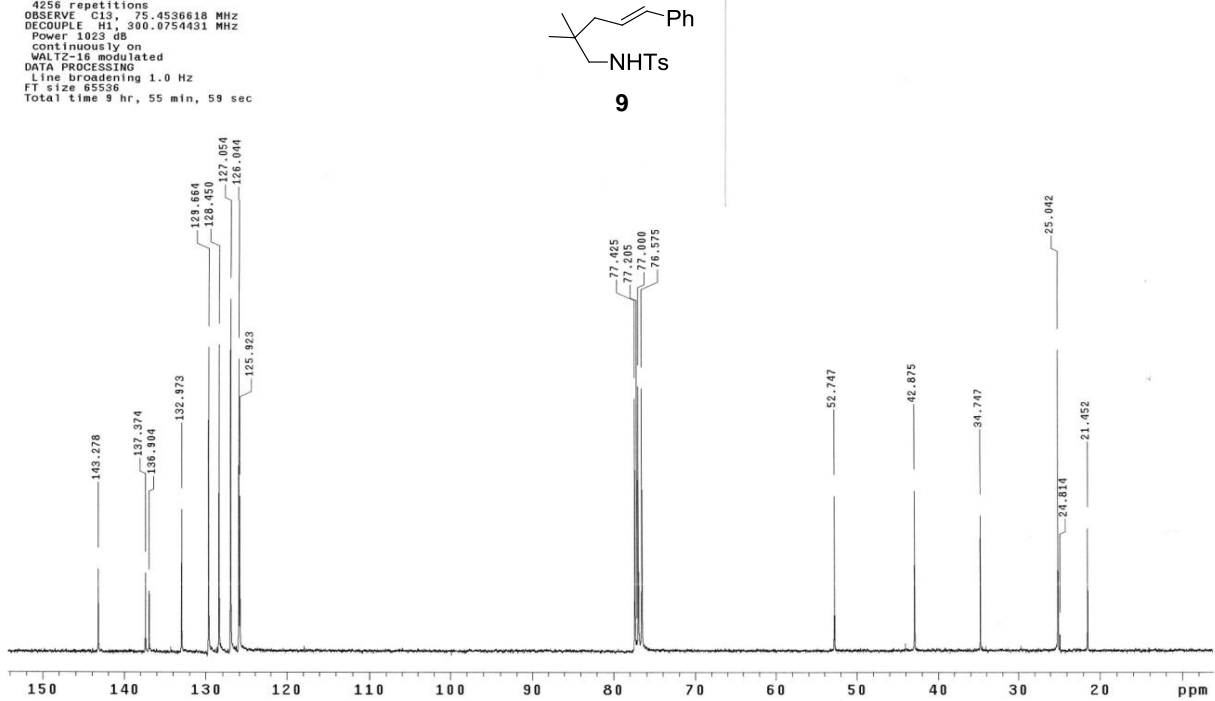



phf\_D\_A0\_prodf3  
 Pulse Sequence: s2pu1  
 Solvent: CDC13  
 Ambient temperature  
 Sample #2  
 File: phf\_D\_aminooxygenation\_prodf3  
 INOVA-500 "nmrdata.chem.buffalo.edu"

Relax. delay 1.000 sec  
 Pulse 46.9 degrees  
 Acq. time 1.800 sec  
 Width 6000.6 Hz  
 16 repetitions  
 OBSERVE H1, 399.9389029 MHz  
 DATA PROCESSING  
 Line broadening 0.9 Hz  
 FT size 32768  
 Total time 0 min, 44 sec

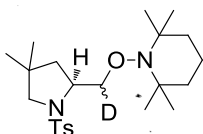

1:1 mixture of diastereomers  
**13-D**

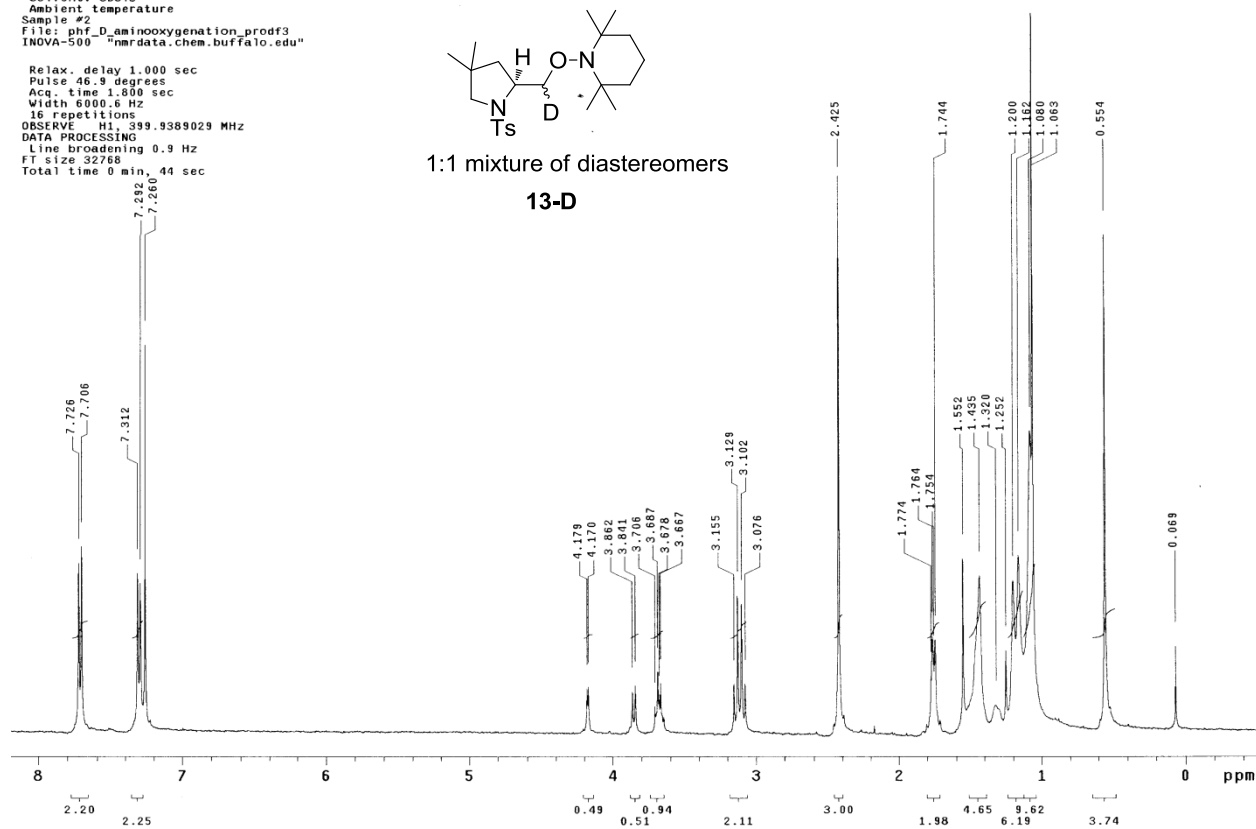

mcp-IV-isotope-labelingpdt-CNMR

Sample Name:  
 Data Collected on:  
 roesy.chem.buffalo.edu-mercury300  
 Archive directory:  
 Sample directory:  
 FidFile: CARBON

Pulse Sequence: CARBON (s2pu1)  
 Solvent: cdc13  
 Data collected on: Mar 24 2011

Temp. 21.5 C / 294.6 K  
 Operator: Chemler

Relax. delay 1.000 sec  
 Pulse 45.0 degrees  
 Acq. time 0.868 sec  
 Width 18867.9 Hz  
 25152 repetitions  
 OBSERVE C13, 75.4536389 MHz  
 DECOUPLE H1, 300.0754430 MHz  
 Power 38 dB  
 continuously on  
 WALTZ-16 modulated  
 DATA PROCESSING  
 Line broadening 0.5 Hz  
 FT size 32768  
 Total time 16 hr, 6 min

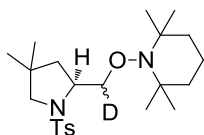

**13-D**

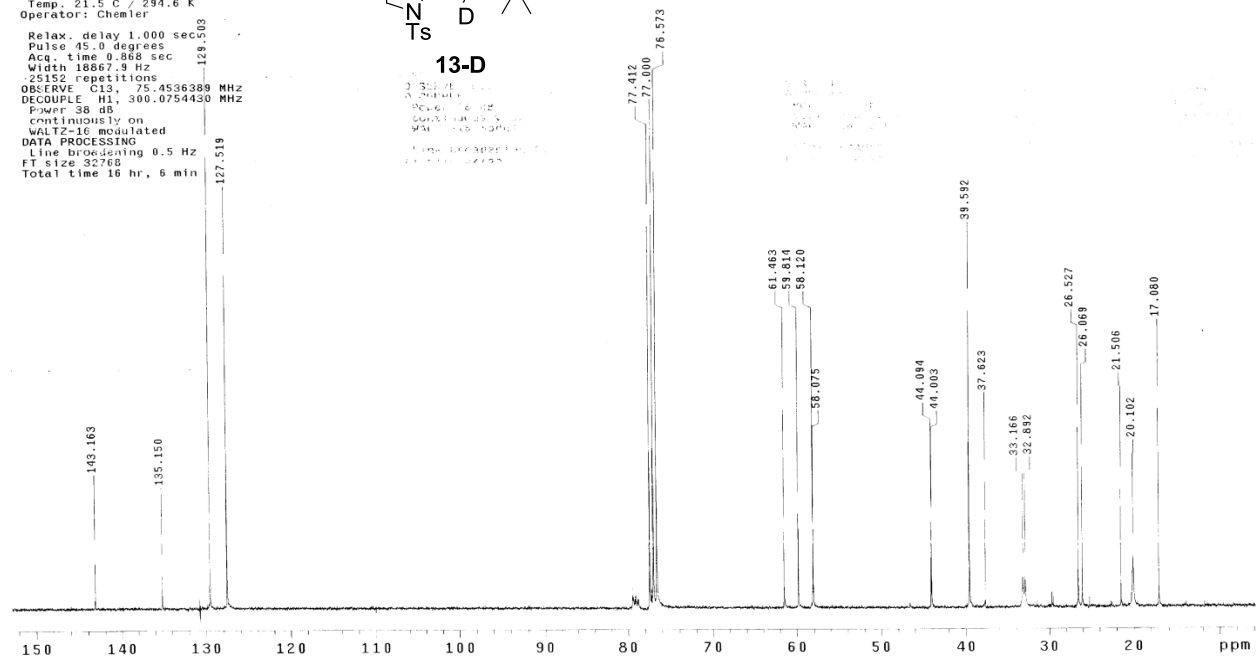

## J. Theoretical Section Supporting Information

### 1. Calculation of [R<sub>2</sub>N-Cu] Ground State Complexes

The ground state structures of three [R<sub>2</sub>N-Cu] complexes derived from complexation of *N*-tosyl-2-allylaniline (**1**) with Cu(OAc)<sub>2</sub> were calculated at 25 °C and a spin density analysis was performed (Figures S-1a-c). These complexes differ in the number of acetate ligands on the copper(II) center, and the cation counterion. The first two complexes are those potentially formed from combination of the lithium amide of **1** with Cu(OAc)<sub>2</sub> (as in the EPR experiment, *vide supra*), [Ts(2-allylphenyl)N-Cu(OAc)<sub>2</sub>]Li (Figure S-1a) and [Ts(2-allylphenyl)N-Cu(OAc)] (Figure S-1b). The third complex is [Ts(2-allylphenyl)N-Cu(OAc)(HOAc)] (Figure S-1c), a structure that may most closely resemble the intermediate formed under the reaction conditions involving Bu<sub>4</sub>NOAc. These complexes all have distorted square planar Cu coordination. In all three structures, the sulfonamide oxygen also coordinates to the Cu(II) center, indicating the sulfonamide favors bidentate coordination.<sup>1,2</sup>

Tetrahedral twist is a description of the degree the coordination sphere deviates from square planarity.<sup>3</sup> The tetrahedral twist of the calculated [Ts(2-allylphenyl)N-Cu(OAc)<sub>2</sub>]Li complex is 4.5°. More dramatically, the bond angles of this complex deviate from the ideal 90° by 5.1-19.2° [e.g. the N-Cu-O(sulfonamide) bond angle is 70.8°]. The tetrahedral twist of the calculated [Ts(2-allylphenyl)N-Cu(OAc)] complex is also 4.5°. The bond angles also deviate from 90° by 19.3-24.1° in this complex [e.g. the N-Cu-O (sulfonamide) bond angle is 72.0° and the O(acetate)-Cu-O(acetate) bond angle is 65.9°]. These deviations from ideal square planarity might cause significant orbital distortion resulting in the loss of the *g*-parallel signal in the EPR spectra (Figure 6c).

Spin density analysis revealed the majority of the spin resides on Cu. For the [Ts(2-allylphenyl)N-Cu(OAc)<sub>2</sub>]Li species, 67% of the spin density resides on Cu while a total of 12% of the spin density resides on the sulfonamide ligand (delocalized through the N, Ar and SO<sub>2</sub>) (Figure S-1a). In the [Ts(2-allylphenyl)N-Cu(OAc)] species, 53% of the spin density resides on Cu and 26% spin density is delocalized through the sulfonamide ligand (Figure S-1b). The remaining spin density is delocalized onto the acetate ligands. This indicates a significant degree of spin delocalization onto the sulfonamide ligand, but the majority still resides on Cu. This analysis is consistent with the EPR spectra observed for the [R<sub>2</sub>N-Cu] intermediate (*vide supra*). Since the spin density on the nitrogen ligand is delocalized, with only 3.5-9.6% located on N, the N-Cu superhyperfine coupling would be expected to be small. Similar to the other two complexes, spin density calculations on the ground state structure of [Ts(2-allylphenyl)N-Cu(OAc)(HOAc)] indicate the Cu contains the majority of the spin density (57%) and the sulfonamide ligand contains 27% total spin density (Figure S-1c).

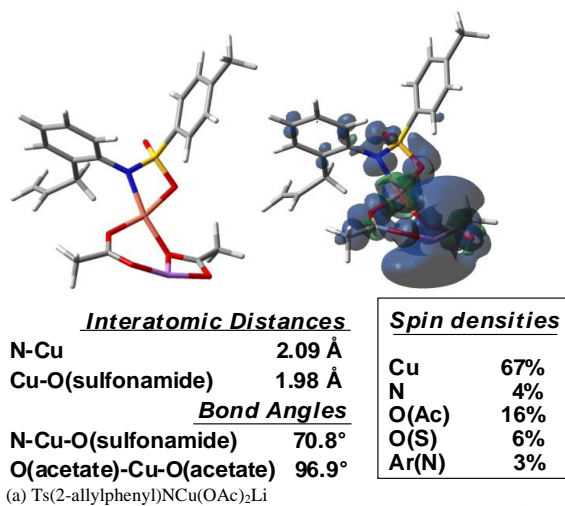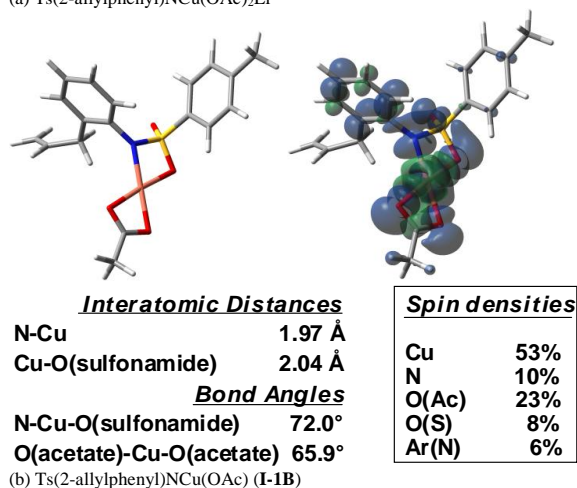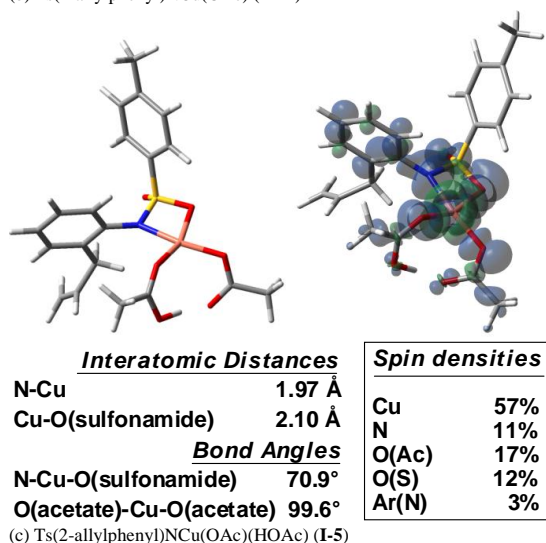

Figure S-1. Spin density analysis of potential relevant ground state [N-Cu] complexes. O(S) refers to the combined spin density of both oxygen atoms bound to sulfur and O(Ac) refers to the combined spin density on all the oxygen atoms of the acetate ligands.

## 2. Discussion of Computational Methods, *in Vacuo* vs. Implicit Solvation Model (Toluene)

The Density Functional Theory calculations discussed throughout this manuscript were carried out in the gas phase without the use of an implicit solvation model to account for solvent effects. The use of gas phase calculations were based upon the relatively small dielectric constant of toluene ( $\epsilon = 2.38$ ), and also in part due to its greater computational cost. It is noteworthy that previous computational studies involving copper complexes and C-[Cu] bond dissociation energies have shown that the observed results of gas phase DFT calculations using the B3LYP functional were consistent with experimental findings.<sup>4</sup> In general, the solvent stabilizes charged species, or systems where the charge is separated/polarized.<sup>5,6,7</sup> We use our calculations to compare various pathways *via* relative energies. All of the complexes we have discussed in the manuscript (except for one path discussed here in the SI) have an overall charge of zero and similar degrees of charge separation throughout. Thus, we would expect solvation to lower all energies by similar amounts, thus no great change in relative energies between steps is expected. Nevertheless, in order to gauge the effect that toluene would have on our computed B3LYP/GenECP gas phase findings, we carried out as a case example the geometry optimizations of the three key stationary points **I-5** (A), **TS-A** and **I-6** (from Scheme 5, Figure 8) in toluene using the IEFPCM solvation model with the keyword added [scrf=smd]. These three points correspond to the ground state, aminocupration transition state, and subsequent intermediate of pathway A. It was found that the activation barrier to aminocupration in this series was unchanged to the first decimal place (17.2 kcal/mol) while the subsequent intermediate **I-6** was lowered in energy by 2.2 kcal/mol. This latter energy change could result in a slightly endothermic rather than exothermic subsequent C-Cu bond homolysis (this is noted in the manuscript text), but the overall message of the calculations remains unchanged.

## 3. Comparison of the aminocupration transition states ( $\text{Bu}_4\text{NOAc}$ vs $n\text{BuLi}$ as base at $100^\circ\text{C}$ ) in temperatures relevant to the kinetics experiments in Figure 4 and Equation 11 (Scheme 6).

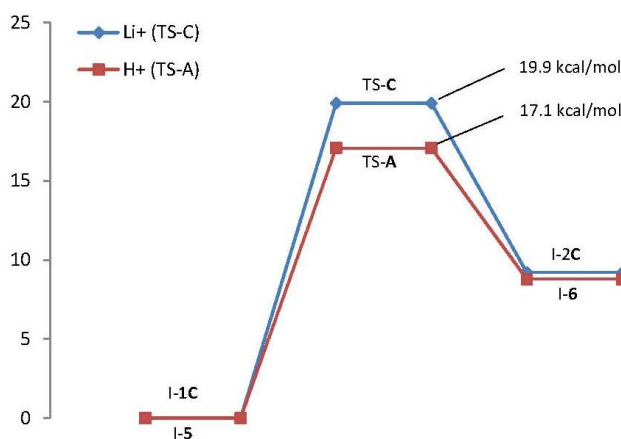

**Figure S-2.** In agreement with experimental results, the aminocupration of  $\text{R}_2\text{NCu}(\text{OAc})_2\text{Li}$  is calculated to be less facile than the aminocupration of  $\text{R}_2\text{NCu}(\text{OAc})(\text{HOAc})$ .

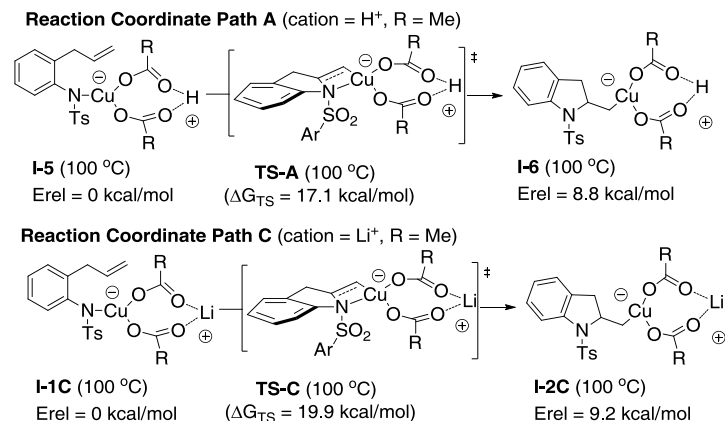

Scheme 6. Cation effects on aminocupration activation energies.

**Note:** Relative energies only are being compared since different atoms are involved in each path.

#### 4. Initial Steps of an Alternative Two Acetate, Anionic Path F

An aminocupration path starting from [R<sub>2</sub>N-Cu(OAc)<sub>2</sub>] (**I-1F**) was calculated and the aminocupration activation energy was found to be significantly higher than either Paths A or B, so this path was not considered further (see scheme below and Figure S-3).

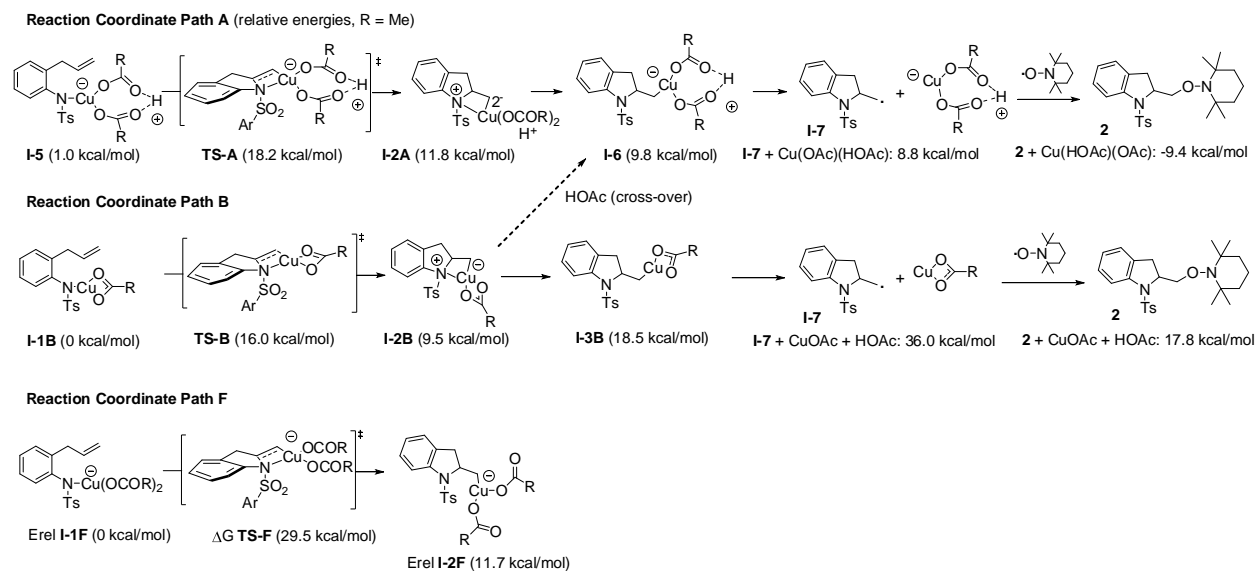

Note: relative energies only are being compared with path F.

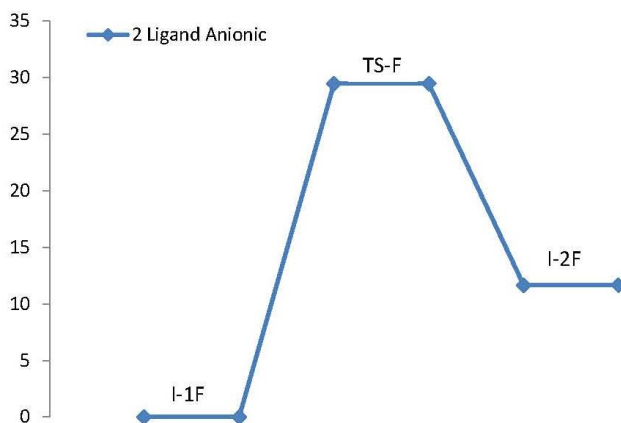

Figure S-3. Aminocupration starting from two-acetate anionic  $[R_2NCu(OAc)_2]$ ;  $\Delta G_{TSF} = 29.5$  kcal/mol.

### 5. Calculation of an Alternative, Nitrogen Radical Aminooxygenation Mechanism

Because there is evidence for a carbon radical intermediate in the aminooxygenation reaction, we also considered the possibility of a nitrogen radical pathway (Path G, Scheme below).<sup>8</sup> A nitrogen radical could result from the homolysis of the N-Cu bond of intermediate **I-5**; exo addition of the nitrogen radical to the alkene generates the carbon radical intermediate **I-7**. The N-Cu BDE was calculated as 9.8 kcal/mol (Figure S-4). The alkene amination transition state occurs at 24.0 kcal/mol relative to the [N-Cu] intermediate **I-5** ground state. Since the nitrogen radical pathway (Figure S-4) is overall higher in energy than the aminocupration pathway (Figure 8), we conclude it is less likely to occur. The competition experiment illustrated in Eq. 9 (vide supra) also supports the aminocupration as the dominant reaction path. It is noteworthy that the [N-Cu] BDE of intermediate **I-5**, 9.82 kcal/mol, is lower in energy than either of the aminocupration transition states (16.0 kcal/mol, **TS-A** or 17.2 kcal/mol, **TS-B**, Figure 8). Thus it is possible this bond can be broken and re-formed reversibly during the reaction and prior to N-C bond formation.

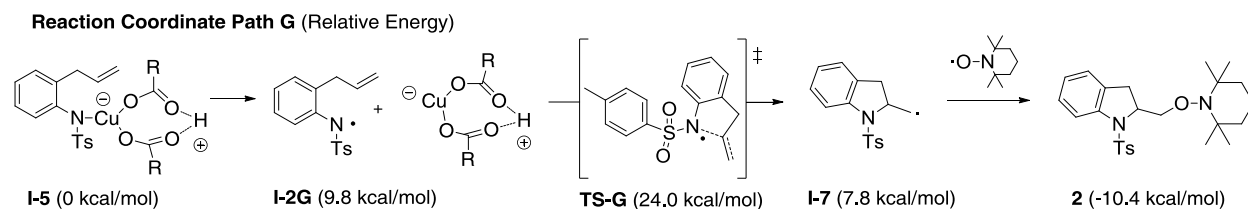

Scheme S-1. Calculated aminyl radical aminooxygenation pathway G.



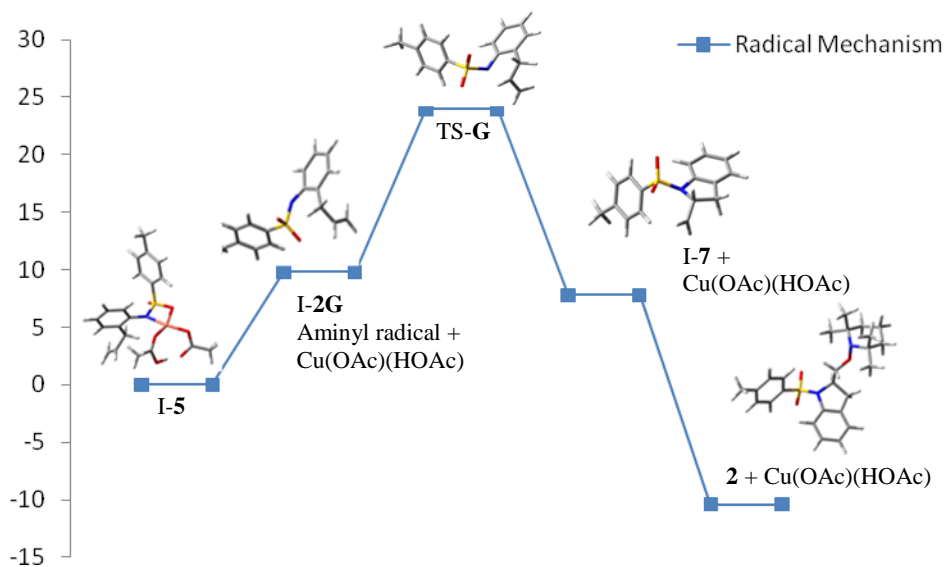

Figure S-4. Aminyl radical potential energy landscape (Energy scale is in kcal/mol).  $\Delta G_{\text{TS-G}} = 24.0$  kcal/mol.

## 6. Potential energy landscape for the possible transition states in pathways D and E.

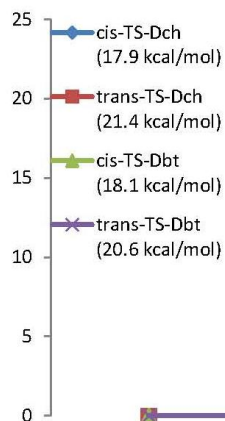

Figure S-5. Potential energy landscape for the four possible transition states in pathway D. (Energy scale in kcal/mol)

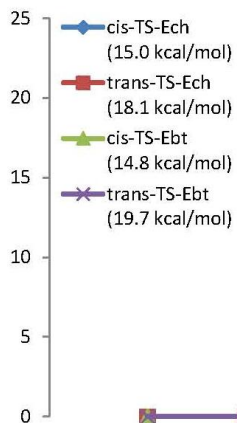

Figure S-6. Potential energy landscape for the four possible transition states in pathway E. (Energy scale in kcal/mol)

7. AIM molecular graphs; electron density ( $\rho$ ) topology.

**[Ts(2-allylphenyl)N-Cu(OAc)]**

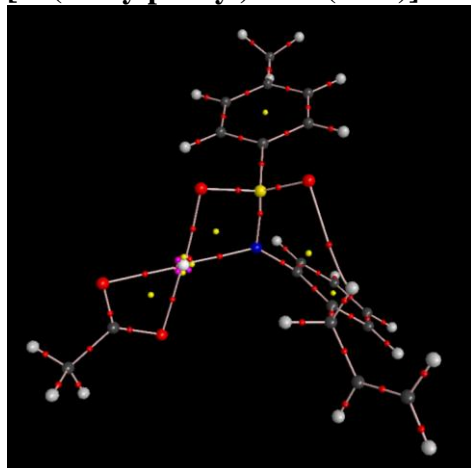

**[Ts(2-allylphenyl)N-Cu(OAc)<sub>2</sub>]Li**

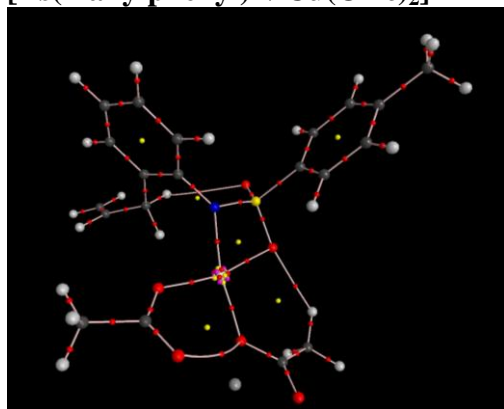

**[Ts(2-allylphenyl)N-Cu(OAc)(HOAc)**

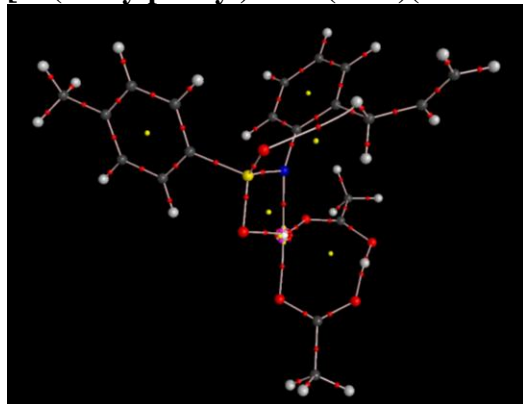

## 8. Thermochemical and coordinate data for all structures.

### [Ts(2-allylphenyl)N-Cu(OAc)<sub>2</sub>Li]

# opt=calcfreq=noraman ub3lyp/genecp gfinput

- Thermochemistry -

Zero-point correction= 0.392311 (Hartree/Particle)  
 Thermal correction to Energy= 0.425168  
 Thermal correction to Enthalpy= 0.426112  
 Thermal correction to Gibbs Free Energy= 0.319918  
 Sum of electronic and zero-point Energies= -1883.048387  
 Sum of electronic and thermal Energies= -1883.015530  
 Sum of electronic and thermal Enthalpies= -1883.014586  
 Sum of electronic and thermal Free Energies= -1883.120780

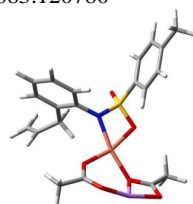

|    |             |             |             |    |             |             |             |
|----|-------------|-------------|-------------|----|-------------|-------------|-------------|
| Cu | -1.09120100 | -1.08137600 | -0.20997600 | H  | 3.61930700  | 1.36401200  | -1.81965700 |
| O  | -1.42622600 | -4.96034000 | -0.03817200 | C  | 5.25367600  | -0.27510900 | 0.70183600  |
| C  | -1.27138700 | -4.02175700 | -0.84636700 | H  | 4.29182200  | -1.62425600 | 2.08681000  |
| C  | -0.52653100 | -4.18886300 | -2.14526800 | H  | 5.88513800  | 1.11341500  | -0.81880800 |
| H  | 0.27652400  | -3.44844300 | -2.20760700 | C  | 6.62709100  | -0.44877000 | 1.30493700  |
| H  | -1.21018400 | -3.98899300 | -2.97812600 | H  | 7.33961100  | 0.27293000  | 0.89444600  |
| H  | -0.12679700 | -5.20045000 | -2.22937300 | H  | 6.60382000  | -0.32125800 | 2.39346600  |
| O  | -1.81223600 | -2.85973800 | -0.57291500 | H  | 7.01980600  | -1.45431600 | 1.10681300  |
| N  | 0.00028500  | 0.56759600  | -0.01394800 | C  | -0.20482100 | 1.87662300  | 0.50651000  |
| S  | 1.07849100  | 0.20279000  | -1.15032200 | C  | -1.04468500 | 2.81037800  | -0.14231200 |
| C  | -3.03014100 | 3.22111300  | -1.68128900 | C  | 0.41872500  | 2.21220900  | 1.71732800  |
| H  | -3.79838500 | 3.10031600  | -0.91586800 | C  | -1.20001100 | 4.07216800  | 0.44462800  |
| C  | -3.28053300 | 3.99098300  | -2.74167300 | C  | 0.24809200  | 3.47312100  | 2.28370400  |
| H  | -2.53988800 | 4.14285000  | -3.52453800 | H  | 1.04009000  | 1.46480200  | 2.20175900  |
| H  | -4.23610300 | 4.49215600  | -2.87238200 | C  | -0.56262400 | 4.40843600  | 1.63959300  |
| C  | -1.74883500 | 2.46636800  | -1.44592500 | H  | -1.83417000 | 4.80171700  | -0.05119100 |
| H  | -1.96987000 | 1.39050200  | -1.44327300 | H  | 0.74269900  | 3.72130400  | 3.21887900  |
| H  | -1.06089600 | 2.62357400  | -2.28669900 | H  | -0.70493900 | 5.39741600  | 2.06738700  |
| O  | 1.22218600  | 1.12486300  | -2.28244900 | C  | -3.03770500 | -1.14996500 | 1.96336800  |
| O  | 0.57129500  | -1.21013900 | -1.45102000 | O  | -2.50387300 | -0.49816300 | 1.00046400  |
| C  | 2.70483200  | 0.01336900  | -0.42293600 | C  | -4.05219200 | -0.38564800 | 2.79735600  |
| C  | 2.88257200  | -0.83123200 | 0.67911300  | H  | -5.03306100 | -0.86196300 | 2.68914400  |
| C  | 3.77979600  | 0.71525400  | -0.96587600 | H  | -4.11578200 | 0.65994400  | 2.49352400  |
| C  | 4.15116000  | -0.96865200 | 1.23080300  | H  | -3.77341200 | -0.45410100 | 3.85365800  |
| H  | 2.03907000  | -1.36843900 | 1.10074600  | O  | -2.79516900 | -2.34580100 | 2.26905000  |
| C  | 5.04606400  | 0.56566800  | -0.39762800 | Li | -2.34350500 | -3.67342100 | 1.11796600  |

[Ts(2-allylphenyl)N-Cu(OAc)(HOAc)]

# opt=calcfreq=noraman ub3lyp/genecp ginput

- Thermochemistry -

Zero-point correction= 0.401222 (Hartree/Particle)  
 Thermal correction to Energy= 0.433205  
 Thermal correction to Enthalpy= 0.434149  
 Thermal correction to Gibbs Free Energy= 0.328976  
 Sum of electronic and zero-point Energies= -1876.001939  
 Sum of electronic and thermal Energies= -1875.969956  
 Sum of electronic and thermal Enthalpies= -1875.969012  
 Sum of electronic and thermal Free Energies= -1876.074185

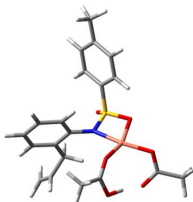

|    |             |             |             |   |             |             |             |
|----|-------------|-------------|-------------|---|-------------|-------------|-------------|
| Cu | -1.10599300 | -1.29984600 | 0.06774800  | H | 3.55123600  | 0.89029400  | -1.62426600 |
| O  | -3.96287400 | 0.02109400  | 1.18550400  | C | 5.12436500  | -1.29001300 | 0.49090000  |
| C  | -2.93888700 | 0.03725500  | 1.98586800  | H | 4.16626100  | -2.99569000 | 1.40121300  |
| C  | -3.10920400 | 0.85151000  | 3.24067900  | H | 5.76889900  | 0.45547400  | -0.59739700 |
| H  | -4.00826700 | 1.46696800  | 3.18957500  | C | 6.46794700  | -1.54606400 | 1.13105700  |
| H  | -2.22220400 | 1.47304600  | 3.38890100  | H | 7.28440700  | -1.13800600 | 0.52675700  |
| H  | -3.18534800 | 0.17005900  | 4.09552000  | H | 6.52707300  | -1.07523300 | 2.12146500  |
| O  | -1.86931200 | -0.57106600 | 1.78299800  | H | 6.64843400  | -2.61721600 | 1.26977700  |
| N  | 0.04784900  | 0.26367000  | -0.24771200 | C | 0.30803000  | 1.51148000  | 0.38512800  |
| S  | 1.00562400  | -0.42592100 | -1.35187800 | C | -0.13042100 | 2.72250000  | -0.19898800 |
| C  | -1.82213300 | 3.87038900  | -1.71074900 | C | 0.95383900  | 1.52395900  | 1.63128500  |
| H  | -2.62759400 | 3.91839000  | -0.97594500 | C | 0.12560800  | 3.91540500  | 0.49040600  |
| C  | -1.77347700 | 4.78319200  | -2.68239800 | C | 1.18658800  | 2.72191500  | 2.30334500  |
| H  | -0.98718200 | 4.77379700  | -3.43473700 | H | 1.26561100  | 0.57732300  | 2.06246000  |
| H  | -2.52227800 | 5.56597100  | -2.77116100 | C | 0.77472200  | 3.92397600  | 1.72530300  |
| C  | -0.84630800 | 2.73604500  | -1.54168600 | H | -0.19899400 | 4.85164000  | 0.04490500  |
| H  | -1.37234000 | 1.77975500  | -1.65686400 | H | 1.68925000  | 2.71596600  | 3.26686300  |
| H  | -0.10710100 | 2.75661900  | -2.35279200 | H | 0.95411100  | 4.86708700  | 2.23496800  |
| O  | 1.23386600  | 0.33742100  | -2.58190300 | C | -3.25417300 | -2.80818500 | -0.54009600 |
| O  | 0.26538300  | -1.75455700 | -1.45018600 | O | -2.07972200 | -2.94463000 | -0.04049800 |
| C  | 2.61744500  | -0.79003000 | -0.65494000 | C | -3.93592700 | -4.08093500 | -0.99843300 |
| C  | 2.78183100  | -1.88980900 | 0.19245500  | H | -5.00326800 | -3.91092700 | -1.14933100 |
| C  | 3.68841700  | 0.05736400  | -0.94340300 | H | -3.77147200 | -4.88172000 | -0.27220200 |
| C  | 4.03249700  | -2.13202600 | 0.75440600  | H | -3.48694300 | -4.39935900 | -1.94644500 |
| H  | 1.95118400  | -2.56149800 | 0.38281600  | O | -3.82807500 | -1.69924300 | -0.69017700 |
| C  | 4.93222000  | -0.19970800 | -0.36812100 | H | -3.83661200 | -0.63966900 | 0.39724900  |

# [Ts(2-allylphenyl)N-Cu(OAc)]

# opt=calcfreq=noraman ub3lyp/genecp gfinput

- Thermochemistry -

Zero-point correction= 0.370856 (Hartree/Particle)  
Thermal correction to Energy= 0.397715  
Thermal correction to Enthalpy= 0.398659  
Thermal correction to Gibbs Free Energy= 0.307514  
Sum of electronic and zero-point Energies= -1573.127337  
Sum of electronic and thermal Energies= -1573.100478  
Sum of electronic and thermal Enthalpies= -1573.099534  
Sum of electronic and thermal Free Energies= -1573.190679

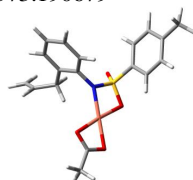

|    |             |             |             |   |             |             |             |
|----|-------------|-------------|-------------|---|-------------|-------------|-------------|
| Cu | -1.15767200 | -1.67450000 | -0.12899300 | H | 5.16129900  | 1.76560100  | -0.47220300 |
| N  | -0.29295500 | 0.07834300  | 0.05570300  | C | 6.46929400  | -0.31835500 | 0.72705500  |
| S  | 0.69083700  | -0.09317100 | -1.21410600 | H | 7.07914000  | 0.47544800  | 0.28477800  |
| C  | -3.59053900 | 2.75790100  | -0.95208400 | H | 6.50176300  | -0.19011300 | 1.81714300  |
| H  | -4.27376600 | 2.54759600  | -0.12771900 | H | 6.94420000  | -1.27927300 | 0.50076200  |
| C  | -3.95935400 | 3.61866500  | -1.90220000 | C | -0.49027200 | 1.30359700  | 0.75487100  |
| H  | -3.30569100 | 3.85904600  | -2.73843800 | C | -1.44275300 | 2.25424200  | 0.32144800  |
| H  | -4.92935700 | 4.10876400  | -1.88605200 | C | 0.25948400  | 1.53487500  | 1.91751000  |
| C  | -2.28119300 | 2.01506600  | -0.92535700 | C | -1.58262800 | 3.42972500  | 1.06930900  |
| H  | -2.48190200 | 0.93721400  | -0.99957900 | C | 0.10001300  | 2.71028900  | 2.64776600  |
| H  | -1.69059900 | 2.26278000  | -1.81660400 | H | 0.96695100  | 0.77409300  | 2.23403600  |
| O  | 0.62097900  | 0.94270500  | -2.24930700 | C | -0.82287100 | 3.66362300  | 2.21637300  |
| O  | 0.28149000  | -1.51965400 | -1.58487000 | H | -2.30301300 | 4.17298600  | 0.73995000  |
| C  | 2.39825300  | -0.18498200 | -0.68268800 | H | 0.69020600  | 2.87828600  | 3.54449000  |
| C  | 2.89276000  | -1.36055700 | -0.10899400 | H | -0.95824300 | 4.58670500  | 2.77391700  |
| C  | 3.20850400  | 0.94349300  | -0.81623600 | C | -3.84855100 | -4.06807000 | 1.22448600  |
| C  | 4.21221100  | -1.39554700 | 0.33186500  | H | -3.43408400 | -5.07375900 | 1.33674700  |
| H  | 2.26169500  | -2.23999100 | -0.03797200 | H | -4.25442800 | -3.71180200 | 2.17290900  |
| C  | 4.52648000  | 0.88996200  | -0.36337900 | H | -4.65688100 | -4.12314800 | 0.48618000  |
| H  | 2.81589300  | 1.83888100  | -1.28554300 | C | -2.78880900 | -3.13306000 | 0.71813400  |
| C  | 5.04787500  | -0.27249800 | 0.21921900  | O | -2.65570900 | -1.95719800 | 1.19550900  |
| H  | 4.60426700  | -2.31307300 | 0.76393800  | O | -1.99864500 | -3.47880500 | -0.22342400 |

## I-5

-----  
 # opt=calcf freq=noraman ub3lyp/genecp ginput temperature=383.15  
 -----

-----  
 - Thermochemistry -  
 -----

Zero-point correction= 0.401222 (Hartree/Particle)  
 Thermal correction to Energy= 0.450085  
 Thermal correction to Enthalpy= 0.451299  
 Thermal correction to Gibbs Free Energy= 0.296804  
 Sum of electronic and zero-point Energies= -1876.001939  
 Sum of electronic and thermal Energies= -1875.953075  
 Sum of electronic and thermal Enthalpies= -1875.951862  
 Sum of electronic and thermal Free Energies= -1876.106357

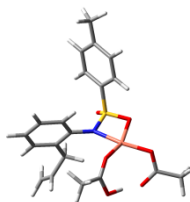

|    |             |             |             |   |             |             |             |
|----|-------------|-------------|-------------|---|-------------|-------------|-------------|
| Cu | -1.10584700 | -1.30008400 | 0.06772200  | C | 5.12451000  | -1.28952200 | 0.49099300  |
| O  | -3.96266400 | 0.02092700  | 1.18562200  | H | 4.16664000  | -2.99543500 | 1.40110000  |
| C  | -2.93867600 | 0.03695800  | 1.98599600  | H | 5.76880800  | 0.45618600  | -0.59709100 |
| C  | -3.10885800 | 0.85131200  | 3.24076000  | C | 6.46812500  | -1.54543900 | 1.13113400  |
| H  | -4.00864700 | 1.46575800  | 3.19029900  | H | 7.28455900  | -1.13758400 | 0.52665800  |
| H  | -2.22244100 | 1.47394400  | 3.38796100  | H | 6.52734200  | -1.07431900 | 2.12139700  |
| H  | -3.18332500 | 0.17002500  | 4.09586500  | H | 6.64858600  | -2.61655600 | 1.27014500  |
| O  | -1.86916200 | -0.57145400 | 1.78312200  | C | 0.30777200  | 1.51142900  | 0.38514400  |
| N  | 0.04779000  | 0.26357300  | -0.24767700 | C | -0.13084100 | 2.72237400  | -0.19900700 |
| S  | 1.00569200  | -0.42587000 | -1.35182000 | C | 0.95354200  | 1.52402600  | 1.63132000  |
| C  | -1.82261900 | 3.87003500  | -1.71086800 | C | 0.12499700  | 3.91532900  | 0.49037100  |
| H  | -2.62813800 | 3.91796700  | -0.97612400 | C | 1.18609300  | 2.72202700  | 2.30336600  |
| C  | -1.77398600 | 4.78282800  | -2.68252600 | H | 1.26543900  | 0.57744500  | 2.06252400  |
| H  | -0.98764200 | 4.77349700  | -3.43481600 | C | 0.77407200  | 3.92401700  | 1.72528700  |
| H  | -2.52285600 | 5.56553300  | -2.77135000 | H | -0.19972200 | 4.85150900  | 0.04484200  |
| C  | -0.84669900 | 2.73578600  | -1.54172200 | H | 1.68872600  | 2.71617100  | 3.26689900  |
| H  | -1.37265000 | 1.77944800  | -1.65685600 | H | 0.95331100  | 4.86716400  | 2.23493800  |
| H  | -0.10747200 | 2.75638700  | -2.35281100 | C | -3.25388300 | -2.80818400 | -0.54030100 |
| O  | 1.23386400  | 0.33751300  | -2.58183100 | O | -2.07955100 | -2.94491700 | -0.04052300 |
| O  | 0.26564700  | -1.75461800 | -1.45016700 | C | -3.93598600 | -4.08072600 | -0.99867200 |
| C  | 2.61754500  | -0.78979200 | -0.65486000 | H | -5.00333300 | -3.91048300 | -1.14928400 |
| C  | 2.78207400  | -1.88963300 | 0.19242100  | H | -3.77151200 | -4.88167900 | -0.27263400 |
| C  | 3.68840000  | 0.05779700  | -0.94319800 | H | -3.48732200 | -4.39903500 | -1.94687500 |
| C  | 4.03276400  | -2.13172200 | 0.75438100  | O | -3.82739400 | -1.69905100 | -0.69053400 |
| H  | 1.95152500  | -2.56146900 | 0.38268500  | H | -3.83634000 | -0.63964300 | 0.39726500  |
| C  | 4.93222200  | -0.19914800 | -0.36791000 |   |             |             |             |
| H  | 3.55111400  | 0.89078000  | -1.62397400 |   |             |             |             |

TS-A

-----  
 # opt=(calcfc,ts,noeigen) freq=noraman ub3lyp/genecp ginput temperature=383.15  
 -----

- Thermochemistry -  
 -----

Zero-point correction= 0.400984 (Hartree/Particle)  
 Thermal correction to Energy= 0.448461  
 Thermal correction to Enthalpy= 0.449675  
 Thermal correction to Gibbs Free Energy= 0.301755  
 Sum of electronic and zero-point Energies= -1875.979746  
 Sum of electronic and thermal Energies= -1875.932268  
 Sum of electronic and thermal Enthalpies= -1875.931054  
 Sum of electronic and thermal Free Energies= -1876.078974

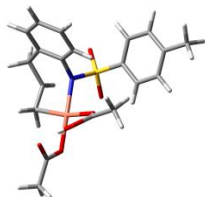

|    |             |             |             |   |             |             |             |
|----|-------------|-------------|-------------|---|-------------|-------------|-------------|
| Cu | -1.65125000 | -0.23486700 | -0.60204000 | H | 3.64899400  | 1.59832400  | -0.45992500 |
| O  | -3.84453400 | -1.27553800 | 1.01469800  | C | 4.52673800  | -1.69497900 | -0.15394400 |
| C  | -4.03310700 | -1.54050300 | -0.20196600 | H | 3.28896700  | -3.34102400 | -0.79497400 |
| C  | -5.34455900 | -2.18479600 | -0.61768200 | H | 5.50459300  | 0.15827700  | 0.35704700  |
| H  | -5.50508600 | -2.10452300 | -1.69436800 | C | 5.67307800  | -2.56871500 | 0.29706700  |
| H  | -6.17144000 | -1.72302300 | -0.07092500 | H | 5.32617000  | -3.56094200 | 0.60350300  |
| H  | -5.32115900 | -3.24563800 | -0.34075900 | H | 6.39795000  | -2.71338400 | -0.51503200 |
| O  | -3.18245500 | -1.31613800 | -1.12997100 | H | 6.21301600  | -2.12024500 | 1.13759400  |
| N  | -0.08545900 | 1.06687900  | -0.45238700 | C | 0.21299900  | 1.68812100  | 0.79505900  |
| S  | 1.10788400  | 0.97310300  | -1.65799400 | C | -0.36318000 | 2.95155900  | 0.98702400  |
| C  | -1.48294300 | 2.36024000  | -1.17339000 | C | 0.94748100  | 1.07985200  | 1.82015900  |
| H  | -1.04353000 | 2.46608900  | -2.16075700 | C | -0.18811700 | 3.61560800  | 2.20068100  |
| C  | -2.66717500 | 1.59032300  | -1.10091600 | C | 1.13268400  | 1.76036800  | 3.02451400  |
| H  | -3.33608200 | 1.70893300  | -0.25003800 | H | 1.36163900  | 0.08939300  | 1.66917200  |
| H  | -3.11499000 | 1.22890200  | -2.02222500 | C | 0.56817200  | 3.02434800  | 3.21549900  |
| C  | -1.15952700 | 3.47508900  | -0.18806700 | H | -0.64059900 | 4.59199400  | 2.35604900  |
| H  | -0.58484500 | 4.25159200  | -0.70791700 | H | 1.70829800  | 1.29617500  | 3.82059800  |
| H  | -2.09391400 | 3.93389500  | 0.15648100  | H | 0.70539700  | 3.54439100  | 4.15941700  |
| O  | 1.67737700  | 2.31196100  | -1.87205500 | C | -0.73613200 | -2.41261200 | 1.43172000  |
| O  | 0.42586800  | 0.26870600  | -2.75486600 | O | -0.55662100 | -1.78274300 | 0.37966500  |
| C  | 2.43000900  | -0.07388000 | -1.05105400 | C | 0.33787300  | -3.30338900 | 2.00752700  |
| C  | 2.31600200  | -1.46203900 | -1.15579300 | H | 0.03298700  | -4.35021500 | 1.89632800  |
| C  | 3.57436200  | 0.51774600  | -0.51107200 | H | 0.45078000  | -3.10995000 | 3.07834200  |
| C  | 3.36645400  | -2.25997300 | -0.70569600 | H | 1.28236800  | -3.14167400 | 1.48687400  |
| H  | 1.42481100  | -1.90466800 | -1.58434600 | O | -1.83528100 | -2.39431900 | 2.13916600  |
| C  | 4.61153200  | -0.29802600 | -0.06289000 | H | -2.58670800 | -1.86081700 | 1.67984700  |



I-2A

-----  
 # opt=calcf freq=noraman ub3lyp/genecp ginput temperature=383.15  
 -----

- Thermochemistry -  
 -----

Zero-point correction= 0.401934 (Hartree/Particle)  
 Thermal correction to Energy= 0.449465  
 Thermal correction to Enthalpy= 0.450678  
 Thermal correction to Gibbs Free Energy= 0.304531  
 Sum of electronic and zero-point Energies= -1875.991666  
 Sum of electronic and thermal Energies= -1875.944135  
 Sum of electronic and thermal Enthalpies= -1875.942922  
 Sum of electronic and thermal Free Energies= -1876.089070

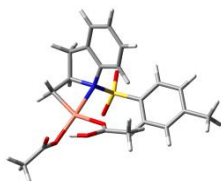

|    |             |             |             |   |             |             |             |
|----|-------------|-------------|-------------|---|-------------|-------------|-------------|
| Cu | -1.77850200 | 0.03957700  | -0.35752900 | H | 3.88143500  | 0.96116300  | -0.65204100 |
| O  | -4.27608900 | -1.14379000 | 0.91798000  | C | 3.97328900  | -2.44295300 | -0.31522800 |
| C  | -4.36862800 | -1.04994400 | -0.33742600 | H | 2.34835000  | -3.75750300 | -0.84953100 |
| C  | -5.72601600 | -1.31105300 | -0.97015900 | H | 5.38739800  | -0.86803100 | 0.10192200  |
| H  | -5.74278200 | -1.00210700 | -2.01674200 | C | 4.90469600  | -3.55804300 | 0.09551500  |
| H  | -6.50089900 | -0.78429000 | -0.40509500 | H | 4.35195200  | -4.43073100 | 0.45792600  |
| H  | -5.94975300 | -2.38237600 | -0.90646300 | H | 5.51475200  | -3.88879600 | -0.75544900 |
| O  | -3.40889400 | -0.76262100 | -1.12488900 | H | 5.59352800  | -3.23656100 | 0.88348100  |
| N  | 0.07857300  | 1.27728300  | -0.44579500 | C | 0.66639000  | 1.70932600  | 0.80252200  |
| S  | 1.23299900  | 0.92664800  | -1.75732900 | C | 0.48692100  | 3.08055700  | 1.01494600  |
| C  | -0.83426600 | 2.46754300  | -0.88833100 | C | 1.27898600  | 0.88950800  | 1.74800100  |
| H  | -0.75128300 | 2.56055600  | -1.97174400 | C | 0.95489100  | 3.66015200  | 2.19085000  |
| C  | -2.22257300 | 2.01468800  | -0.50721600 | C | 1.75410100  | 1.48462600  | 2.92059200  |
| H  | -2.54655400 | 2.31296800  | 0.49481800  | H | 1.36386700  | -0.17770700 | 1.58144500  |
| H  | -2.99306000 | 2.17564500  | -1.26002400 | C | 1.59769200  | 2.85678900  | 3.13927600  |
| C  | -0.25468800 | 3.69671900  | -0.14633100 | H | 0.81794200  | 4.72270500  | 2.37376400  |
| H  | 0.42909900  | 4.26396000  | -0.79003300 | H | 2.23623700  | 0.86903100  | 3.67482500  |
| H  | -1.05716900 | 4.37085400  | 0.17036900  | H | 1.96329400  | 3.30071700  | 4.06104500  |
| O  | 2.06757400  | 2.11615500  | -1.96914600 | C | -1.20566400 | -2.33611300 | 1.50244600  |
| O  | 0.38436300  | 0.40133600  | -2.83032300 | O | -0.83741100 | -1.57195100 | 0.59060500  |
| C  | 2.27368400  | -0.38576500 | -1.14158100 | C | -0.22980800 | -3.29270600 | 2.14797600  |
| C  | 1.82824500  | -1.70771900 | -1.21034800 | H | -0.62705300 | -4.31162300 | 2.10377400  |
| C  | 3.55293800  | -0.07183600 | -0.67585100 | H | -0.11713300 | -3.03612100 | 3.20705300  |
| C  | 2.68395900  | -2.72503200 | -0.79256100 | H | 0.73912000  | -3.24294600 | 1.64982700  |
| H  | 0.83658200  | -1.93407300 | -1.58293800 | O | -2.40407500 | -2.39718800 | 1.99518800  |
| C  | 4.39068700  | -1.10457000 | -0.26166000 | H | -3.11204700 | -1.78039100 | 1.50805800  |

## I-6

-----  
 # opt=calcf freq=noraman ub3lyp/genecp ginput temperature=383.15  
 -----

- Thermochemistry -  
 -----

Zero-point correction= 0.403376 (Hartree/Particle)  
 Thermal correction to Energy= 0.451379  
 Thermal correction to Enthalpy= 0.452592  
 Thermal correction to Gibbs Free Energy= 0.300389  
 Sum of electronic and zero-point Energies= -1875.989313  
 Sum of electronic and thermal Energies= -1875.941309  
 Sum of electronic and thermal Enthalpies= -1875.940096  
 Sum of electronic and thermal Free Energies= -1876.092299

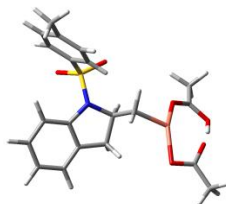

|    |             |             |             |   |             |             |             |
|----|-------------|-------------|-------------|---|-------------|-------------|-------------|
| Cu | -2.77557900 | -0.41551800 | 0.72540600  | H | 4.93720800  | -0.84859200 | -1.58757000 |
| O  | -4.85344500 | -0.47485500 | 1.20777400  | C | 5.33564200  | -1.84255600 | 1.66329300  |
| C  | -4.70623300 | 0.65675200  | 1.80164000  | H | 3.71434000  | -2.02490700 | 3.07669200  |
| C  | -5.90715900 | 1.33464600  | 2.41243800  | H | 6.69992200  | -1.56260700 | 0.01992000  |
| H  | -5.64383800 | 2.32165200  | 2.79536900  | C | 6.40004000  | -2.25694200 | 2.65144800  |
| H  | -6.29135600 | 0.71457000  | 3.23001800  | H | 6.57340200  | -1.47155900 | 3.39858500  |
| H  | -6.70441200 | 1.41906600  | 1.66699500  | H | 6.10725500  | -3.16119100 | 3.19746800  |
| O  | -3.55658000 | 1.16951500  | 1.88455100  | H | 7.35377800  | -2.45616700 | 2.15327200  |
| N  | 1.19924800  | 0.58583100  | -0.55675500 | C | 1.60139400  | 1.94659500  | -0.56347400 |
| S  | 2.09145500  | -0.61631800 | -1.34868100 | C | 0.48176900  | 2.78645900  | -0.55282700 |
| C  | -0.31806900 | 0.48183500  | -0.53057300 | C | 2.89647800  | 2.46503800  | -0.53161400 |
| H  | -0.62987600 | -0.06481600 | -1.42186500 | C | 0.64688200  | 4.16579900  | -0.50609100 |
| C  | -0.78820100 | -0.25755300 | 0.70491300  | C | 3.04850700  | 3.85459200  | -0.49799000 |
| H  | -0.45987800 | -1.30195100 | 0.71421100  | H | 3.76496600  | 1.81698700  | -0.54163600 |
| H  | -0.53135800 | 0.26165000  | 1.63474000  | C | 1.93925300  | 4.70329500  | -0.48147900 |
| C  | -0.78655900 | 1.96855800  | -0.58799600 | H | -0.22112800 | 4.82081700  | -0.49406600 |
| H  | -1.36556100 | 2.16458400  | -1.49998200 | H | 4.05047700  | 4.27495100  | -0.48087800 |
| H  | -1.44195600 | 2.19239800  | 0.26188700  | H | 2.07853000  | 5.78015100  | -0.45004900 |
| O  | 2.78113100  | -0.07135000 | -2.52337000 | C | -4.07788100 | -1.93297400 | -1.54157700 |
| O  | 1.17196300  | -1.75106000 | -1.48849400 | O | -3.03072700 | -1.58990700 | -0.97597200 |
| C  | 3.35505000  | -1.04025400 | -0.14675600 | C | -4.06234300 | -2.74940700 | -2.80476800 |
| C  | 2.99794300  | -1.37446800 | 1.16272200  | H | -4.72345700 | -2.29879700 | -3.55096600 |
| C  | 4.68313100  | -1.10860400 | -0.56568100 | H | -4.44866600 | -3.75179700 | -2.58808200 |
| C  | 3.98856300  | -1.76889200 | 2.05596700  | H | -3.04460100 | -2.82474900 | -3.18769200 |
| H  | 1.96140200  | -1.31252100 | 1.47761800  | O | -5.28805500 | -1.64149400 | -1.11156100 |
| C  | 5.66363700  | -1.50881900 | 0.34402500  | H | -5.24676300 | -1.14225700 | -0.24173600 |

## I-7

-----  
 # opt=calcf freq=noraman ub3lyp/genecp ginput temperature=383.15  
 -----

- Thermochemistry -  
 -----

Zero-point correction= 0.285077 (Hartree/Particle)  
 Thermal correction to Energy= 0.314376  
 Thermal correction to Enthalpy= 0.315590  
 Thermal correction to Gibbs Free Energy= 0.214831  
 Sum of electronic and zero-point Energies= -1222.295575  
 Sum of electronic and thermal Energies= -1222.266276  
 Sum of electronic and thermal Enthalpies= -1222.265062  
 Sum of electronic and thermal Free Energies= -1222.365821

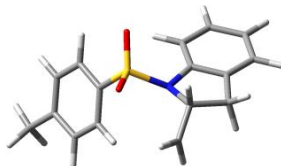

|   |             |             |             |   |             |             |             |
|---|-------------|-------------|-------------|---|-------------|-------------|-------------|
| N | 1.03533000  | -0.67747700 | -0.03467100 | H | -1.98051200 | 1.04476300  | 2.05905900  |
| S | -0.15119000 | -0.97715200 | 1.15332700  | C | -4.00559600 | 0.71159700  | -0.67989300 |
| C | 1.95130900  | -1.83741600 | -0.41263700 | H | -3.62274500 | -0.65706300 | -2.30544200 |
| H | 2.27145300  | -2.32773500 | 0.51208400  | H | -4.08850600 | 1.94420900  | 1.08431200  |
| C | 1.28812400  | -2.82407900 | -1.30599800 | C | -5.28517600 | 1.24586200  | -1.27836200 |
| H | 1.08796000  | -2.55860900 | -2.34057000 | H | -5.72831400 | 2.02307100  | -0.64861700 |
| H | 0.89108100  | -3.75338400 | -0.91743800 | H | -5.10983500 | 1.67664000  | -2.27175200 |
| C | 3.15931300  | -1.11220600 | -1.07485700 | H | -6.02860300 | 0.44843000  | -1.40046900 |
| H | 4.10407100  | -1.58422600 | -0.78537700 | C | 1.78233000  | 0.53367300  | -0.04419300 |
| H | 3.08541600  | -1.18599500 | -2.16848200 | C | 3.03721100  | 0.32338000  | -0.62871500 |
| O | 0.12711500  | -0.20881700 | 2.37108900  | C | 1.39199100  | 1.80170500  | 0.38764100  |
| O | -0.28083100 | -2.43632700 | 1.20686500  | C | 3.92722500  | 1.38020600  | -0.77724400 |
| C | -1.63110600 | -0.28954000 | 0.41181300  | C | 2.29906000  | 2.85561500  | 0.23791600  |
| C | -2.08778500 | -0.78439200 | -0.81371200 | H | 0.42573000  | 1.97126500  | 0.84589000  |
| C | -2.34637200 | 0.68610900  | 1.10293600  | C | 3.55672500  | 2.65555700  | -0.33533900 |
| C | -3.26620900 | -0.27849400 | -1.35034700 | H | 4.90186900  | 1.21590200  | -1.23061100 |
| H | -1.52258800 | -1.54923500 | -1.33673300 | H | 2.01422100  | 3.84651600  | 0.58114500  |
| C | -3.52873000 | 1.18166200  | 0.54883700  | H | 4.24688100  | 3.48792900  | -0.43823500 |

2

-----  
 # opt=calcf freq=noraman ub3lyp/genecp ginput temperature=383.15  
 -----

- Thermochemistry -  
 -----

Zero-point correction= 0.556596 (Hartree/Particle)  
 Thermal correction to Energy= 0.605086  
 Thermal correction to Enthalpy= 0.606299  
 Thermal correction to Gibbs Free Energy= 0.463938  
 Sum of electronic and zero-point Energies= -1705.801809  
 Sum of electronic and thermal Energies= -1705.753320  
 Sum of electronic and thermal Enthalpies= -1705.752107  
 Sum of electronic and thermal Free Energies= -1705.894468

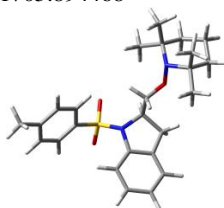

|   |             |             |             |   |             |             |             |
|---|-------------|-------------|-------------|---|-------------|-------------|-------------|
| N | 1.22959600  | 0.82085600  | -0.51712900 | H | 0.15292100  | 5.07142100  | 0.40383600  |
| S | 2.23154500  | -0.07294500 | -1.57900700 | H | 4.06891200  | 3.80569200  | 1.67294300  |
| C | -0.22215300 | 0.96666800  | -0.87300100 | H | 2.32354500  | 5.55978200  | 1.52299900  |
| H | -0.39879800 | 0.55940600  | -1.86817600 | C | -5.23968900 | 0.77005100  | 0.22327600  |
| C | -1.03789800 | 0.15617600  | 0.13897700  | C | -5.85078500 | -0.26052000 | -0.73541800 |
| H | -0.69294100 | -0.88232300 | 0.13510900  | C | -4.74851500 | -1.04386100 | -1.46030000 |
| H | -0.90299000 | 0.55978200  | 1.15214800  | C | -3.73742600 | -1.70265300 | -0.49256500 |
| C | -0.49359800 | 2.49223000  | -0.81544700 | C | -4.23250200 | 0.14857100  | 1.22089600  |
| H | -0.55045900 | 2.92261800  | -1.82404200 | H | -5.18638600 | -1.81716900 | -2.10500900 |
| H | -1.45026800 | 2.69759900  | -0.32581600 | H | -6.51311200 | -0.94579200 | -0.18972100 |
| O | 3.14909100  | 0.81338200  | -2.30183500 | H | -6.48608700 | 0.25029800  | -1.46988800 |
| O | 1.32034900  | -0.96621500 | -2.30324000 | H | -4.71325800 | 1.53200000  | -0.36524800 |
| C | 3.21763000  | -1.06207600 | -0.45465200 | H | -6.02793400 | 1.29009000  | 0.78358400  |
| C | 2.59424900  | -1.97758500 | 0.39888100  | H | -4.19736700 | -0.35802800 | -2.11566100 |
| C | 4.60664500  | -0.95817400 | -0.50178700 | N | -3.20412700 | -0.70687900 | 0.51605300  |
| C | 3.37774100  | -2.78131300 | 1.21930500  | O | -2.39923400 | 0.22969800  | -0.26678000 |
| H | 1.51243300  | -2.05754100 | 0.41931800  | C | -3.49469800 | 1.27301200  | 1.97178700  |
| C | 5.37758300  | -1.77472400 | 0.32870900  | H | -4.22208200 | 1.86660800  | 2.53662900  |
| H | 5.06904800  | -0.25048900 | -1.18134600 | H | -2.77196100 | 0.85872000  | 2.68363100  |
| C | 4.78053800  | -2.69403700 | 1.19862400  | H | -2.97093200 | 1.94342300  | 1.28918100  |
| H | 2.89567000  | -3.49206300 | 1.88631300  | C | -4.94975600 | -0.68629500 | 2.30563500  |
| H | 6.46119700  | -1.69628400 | 0.29410900  | H | -4.22743400 | -1.29569600 | 2.85774200  |
| C | 5.61408100  | -3.57666900 | 2.09693600  | H | -5.43154700 | -0.00506400 | 3.01552900  |
| H | 6.68429000  | -3.41401100 | 1.93810500  | H | -5.72956400 | -1.34183200 | 1.91828700  |
| H | 5.39828600  | -3.38282700 | 3.15499100  | C | -4.36143200 | -2.90993900 | 0.24383100  |
| H | 5.40429500  | -4.63780900 | 1.91544900  | H | -4.41476500 | -3.75628500 | -0.44961200 |
| C | 1.68722400  | 2.05469600  | 0.03678200  | H | -3.73588000 | -3.20645100 | 1.09156100  |
| C | 0.69734400  | 3.03948100  | -0.06363300 | H | -5.37478600 | -2.73597500 | 0.60638400  |
| C | 2.90694300  | 2.30824900  | 0.66089300  | C | -2.55399500 | -2.26956800 | -1.30071000 |
| C | 0.91821700  | 4.30231600  | 0.47457800  | H | -2.93310100 | -3.00648200 | -2.01744200 |
| C | 3.12302700  | 3.58659100  | 1.18511100  | H | -2.02498200 | -1.49902500 | -1.86262500 |
| H | 3.66848100  | 1.54095500  | 0.74293800  | H | -1.84010100 | -2.78138500 | -0.64553100 |
| C | 2.14005900  | 4.57579100  | 1.10092700  |   |             |             |             |

**I-1B**

-----  
# opt=calcfc freq=noraman ub3lyp/genecp ginput temperature=383.15  
-----

-----  
- Thermochemistry -  
-----

Zero-point correction= 0.338049 (Hartree/Particle)  
Thermal correction to Energy= 0.378466  
Thermal correction to Enthalpy= 0.379679  
Thermal correction to Gibbs Free Energy= 0.245903  
Sum of electronic and zero-point Energies= -1646.960806  
Sum of electronic and thermal Energies= -1646.920389  
Sum of electronic and thermal Enthalpies= -1646.919176  
Sum of electronic and thermal Free Energies= -1647.052952

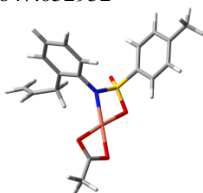

|    |             |             |             |   |             |             |             |
|----|-------------|-------------|-------------|---|-------------|-------------|-------------|
| Cu | -1.15767200 | -1.67450000 | -0.12899300 | H | 5.16129900  | 1.76560100  | -0.47220300 |
| N  | -0.29295500 | 0.07834300  | 0.05570300  | C | 6.46929400  | -0.31835500 | 0.72705500  |
| S  | 0.69083700  | -0.09317100 | -1.21410600 | H | 7.07914000  | 0.47544800  | 0.28477800  |
| C  | -3.59053900 | 2.75790100  | -0.95208400 | H | 6.50176300  | -0.19011300 | 1.81714300  |
| H  | -4.27376600 | 2.54759600  | -0.12771900 | H | 6.94420000  | -1.27927300 | 0.50076200  |
| C  | -3.95935400 | 3.61866500  | -1.90220000 | C | -0.49027200 | 1.30359700  | 0.75487100  |
| H  | -3.30569100 | 3.85904600  | -2.73843800 | C | -1.44275300 | 2.25424200  | 0.32144800  |
| H  | -4.92935700 | 4.10876400  | -1.88605200 | C | 0.25948400  | 1.53487500  | 1.91751000  |
| C  | -2.28119300 | 2.01506600  | -0.92535700 | C | -1.58262800 | 3.42972500  | 1.06930900  |
| H  | -2.48190200 | 0.93721400  | -0.99957900 | C | 0.10001300  | 2.71028900  | 2.64776600  |
| H  | -1.69059900 | 2.26278000  | -1.81660400 | H | 0.96695100  | 0.77409300  | 2.23403600  |
| O  | 0.62097900  | 0.94270500  | -2.24930700 | C | -0.82287100 | 3.66362300  | 2.21637300  |
| O  | 0.28149000  | -1.51965400 | -1.58487000 | H | -2.30301300 | 4.17298600  | 0.73995000  |
| C  | 2.39825300  | -0.18498200 | -0.68268800 | H | 0.69020600  | 2.87828600  | 3.54449000  |
| C  | 2.89276000  | -1.36055700 | -0.10899400 | H | -0.95824300 | 4.58670500  | 2.77391700  |
| C  | 3.20850400  | 0.94349300  | -0.81623600 | C | -3.84855100 | -4.06807000 | 1.22448600  |
| C  | 4.21221100  | -1.39554700 | 0.33186500  | H | -3.43408400 | -5.07375900 | 1.33674700  |
| H  | 2.26169500  | -2.23999100 | -0.03797200 | H | -4.25442800 | -3.71180200 | 2.17290900  |
| C  | 4.52648000  | 0.88996200  | -0.36337900 | H | -4.65688100 | -4.12314800 | 0.48618000  |
| H  | 2.81589300  | 1.83888100  | -1.28554300 | C | -2.78880900 | -3.13306000 | 0.71813400  |
| C  | 5.04787500  | -0.27249800 | 0.21921900  | O | -2.65570900 | -1.95719800 | 1.19550900  |
| H  | 4.60426700  | -2.31307300 | 0.76393800  | O | -1.99864500 | -3.47880500 | -0.22342400 |

TS-B

-----  
 # opt=(calcfc,ts,noeigen) freq=noraman ub3lyp/genecp ginput temperature=383.15  
 -----

- Thermochemistry -  
 -----

Zero-point correction= 0.337937 (Hartree/Particle)  
 Thermal correction to Energy= 0.376832  
 Thermal correction to Enthalpy= 0.378046  
 Thermal correction to Gibbs Free Energy= 0.252531  
 Sum of electronic and zero-point Energies= -1646.942067  
 Sum of electronic and thermal Energies= -1646.903172  
 Sum of electronic and thermal Enthalpies= -1646.901959  
 Sum of electronic and thermal Free Energies= -1647.027473

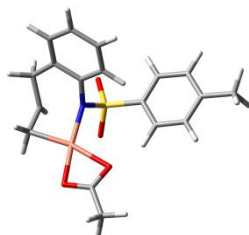

|    |             |             |             |   |             |             |             |
|----|-------------|-------------|-------------|---|-------------|-------------|-------------|
| Cu | 1.81459900  | 1.02062400  | -0.00684800 | C | -3.06397000 | -0.89758600 | -0.89894300 |
| O  | 0.62302300  | 2.59518000  | 0.84943700  | C | -3.37635300 | 1.60232300  | 0.30500600  |
| C  | 1.70248400  | 3.25626400  | 0.85893100  | H | -1.32281200 | 1.97153800  | -0.23712400 |
| C  | 1.75131300  | 4.68265300  | 1.34649800  | C | -4.28241200 | -0.54246000 | -0.32094500 |
| H  | 0.78011800  | 4.99051600  | 1.73768900  | H | -2.92486600 | -1.86283600 | -1.37294600 |
| H  | 2.03965000  | 5.33919900  | 0.51833100  | C | -4.45899500 | 0.70787000  | 0.28648500  |
| H  | 2.51745500  | 4.78142600  | 2.12209800  | H | -3.49313300 | 2.57448400  | 0.77771500  |
| O  | 2.78009400  | 2.70369500  | 0.43864000  | H | -5.10813500 | -1.24929400 | -0.34294900 |
| N  | 0.68006800  | -0.60314600 | -0.38509800 | C | -5.78780500 | 1.09880900  | 0.88820600  |
| S  | -0.45716500 | -0.43267200 | -1.63850300 | H | -5.65559600 | 1.65838300  | 1.82073800  |
| C  | 2.43425200  | -1.18873000 | -1.25850400 | H | -6.35406100 | 1.74293800  | 0.20253000  |
| H  | 2.11059300  | -1.03824300 | -2.28460700 | H | -6.40673800 | 0.22147400  | 1.10082800  |
| C  | 3.34749900  | -0.23274700 | -0.75001300 | C | 0.53362800  | -1.63906100 | 0.58410200  |
| H  | 3.95845500  | -0.48250800 | 0.11629100  | C | 1.42910200  | -2.70975100 | 0.45126500  |
| H  | 3.77416300  | 0.49437500  | -1.43847200 | C | -0.36231000 | -1.59041600 | 1.65845300  |
| C  | 2.35147200  | -2.61827900 | -0.74434200 | C | 1.41890700  | -3.74255200 | 1.38756400  |
| H  | 1.97687200  | -3.26328200 | -1.54854800 | C | -0.37768500 | -2.63878100 | 2.58010700  |
| H  | 3.35867500  | -2.96532800 | -0.48445100 | H | -1.03150400 | -0.74354300 | 1.76761200  |
| O  | -0.64454100 | -1.72935000 | -2.30553700 | C | 0.50806200  | -3.71129400 | 2.44672100  |
| O  | 0.05926900  | 0.71997000  | -2.39400000 | H | 2.11816200  | -4.56968200 | 1.29252100  |
| C  | -2.01008000 | 0.01673400  | -0.87041600 | H | -1.07523200 | -2.60991300 | 3.41249700  |
| C  | -2.15260200 | 1.27345700  | -0.27224900 | H | 0.49892300  | -4.51768500 | 3.17468200  |

**I-2B**

-----  
# opt=calcfc freq=noraman ub3lyp/genecp ginput temperature=383.15  
-----

- Thermochemistry -  
-----

Zero-point correction= 0.339740 (Hartree/Particle)  
Thermal correction to Energy= 0.378694  
Thermal correction to Enthalpy= 0.379907  
Thermal correction to Gibbs Free Energy= 0.255549  
Sum of electronic and zero-point Energies= -1646.953593  
Sum of electronic and thermal Energies= -1646.914639  
Sum of electronic and thermal Enthalpies= -1646.913426  
Sum of electronic and thermal Free Energies= -1647.037783

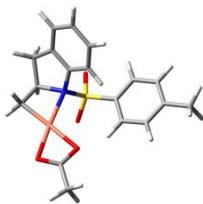

|    |             |             |             |   |             |             |             |
|----|-------------|-------------|-------------|---|-------------|-------------|-------------|
| Cu | 2.05427700  | 0.79340400  | 0.05533300  | C | -3.05483100 | -0.50785400 | -0.85706400 |
| O  | 1.03642500  | 2.49498100  | 0.66609800  | C | -2.93000500 | 2.07683900  | 0.19549200  |
| C  | 2.16514700  | 3.08307900  | 0.76891600  | H | -0.87349400 | 2.10220100  | -0.44769600 |
| C  | 2.22078200  | 4.53709300  | 1.17271300  | C | -4.17609500 | 0.06118500  | -0.25673600 |
| H  | 1.59886600  | 4.69953200  | 2.05838100  | H | -3.08567200 | -1.50842500 | -1.27339900 |
| H  | 1.80689900  | 5.14983400  | 0.36368700  | C | -4.13310900 | 1.35713500  | 0.27635300  |
| H  | 3.24797600  | 4.84799300  | 1.37047100  | H | -2.87683200 | 3.08037800  | 0.60985900  |
| O  | 3.23216900  | 2.44300500  | 0.51655500  | H | -5.09845900 | -0.51116600 | -0.20146900 |
| N  | 0.70161500  | -0.83161400 | -0.45330400 | C | -5.35827700 | 1.97828800  | 0.90285000  |
| S  | -0.47044700 | -0.47921700 | -1.75477200 | H | -5.09998100 | 2.56331400  | 1.79213600  |
| C  | 1.94264300  | -1.57019100 | -1.06313900 | H | -5.85275600 | 2.66077900  | 0.19917100  |
| H  | 1.91204300  | -1.42313200 | -2.14347100 | H | -6.09057800 | 1.21857700  | 1.19331000  |
| C  | 3.11429900  | -0.82858300 | -0.45890000 | C | 0.23951700  | -1.70027600 | 0.60721000  |
| H  | 3.50477500  | -1.26990500 | 0.46349500  | C | 0.81983300  | -2.97086700 | 0.52500200  |
| H  | 3.91545000  | -0.58195300 | -1.15723700 | C | -0.61009900 | -1.34257700 | 1.65240000  |
| C  | 1.73970400  | -3.05207600 | -0.66873000 | C | 0.52378600  | -3.92458800 | 1.49460500  |
| H  | 1.27337500  | -3.62036200 | -1.48308200 | C | -0.90636600 | -2.31153400 | 2.61556800  |
| H  | 2.69984600  | -3.52312700 | -0.43461000 | H | -1.01987900 | -0.34113000 | 1.72185300  |
| O  | -0.88260200 | -1.75117300 | -2.36113300 | C | -0.34895700 | -3.59137500 | 2.53631200  |
| O  | 0.21566900  | 0.54253900  | -2.55049400 | H | 0.97056900  | -4.91424000 | 1.44800500  |
| C  | -1.87601700 | 0.23779200  | -0.92436300 | H | -1.56609100 | -2.05881400 | 3.44063000  |
| C  | -1.79784200 | 1.53580200  | -0.40892900 | H | -0.58221400 | -4.32885500 | 3.29922600  |

**I-3B**

-----  
# opt=calcfc freq=noraman ub3lyp/genecp gfinput temperature=383.15  
-----

- Thermochemistry -  
-----

Zero-point correction= 0.339828 (Hartree/Particle)  
Thermal correction to Energy= 0.364989  
Thermal correction to Enthalpy= 0.365933  
Thermal correction to Gibbs Free Energy= 0.278639  
Sum of electronic and zero-point Energies= -1646.937915  
Sum of electronic and thermal Energies= -1646.912754  
Sum of electronic and thermal Enthalpies= -1646.911810  
Sum of electronic and thermal Free Energies= -1646.999104

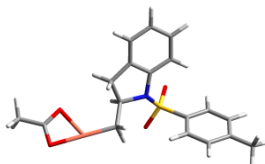

|    |             |             |             |   |             |             |             |
|----|-------------|-------------|-------------|---|-------------|-------------|-------------|
| Cu | 3.23599800  | -1.37101800 | -0.54345300 | C | -4.11611700 | -0.54386400 | 1.03193600  |
| O  | 5.19664900  | -1.80125100 | -0.53723100 | C | -3.82004100 | -2.08397900 | -1.27732200 |
| C  | 5.42387000  | -0.71479800 | 0.08982000  | H | -1.69887700 | -1.78856700 | -1.02596000 |
| C  | 6.82252600  | -0.34869600 | 0.51052200  | C | -5.23796500 | -1.05332100 | 0.37554200  |
| H  | 7.53127600  | -0.63171600 | -0.27191600 | H | -4.21539200 | 0.05237000  | 1.93263500  |
| H  | 7.07837600  | -0.91301600 | 1.41493600  | C | -5.11047900 | -1.82539700 | -0.78514700 |
| H  | 6.89512000  | 0.71806100  | 0.72991600  | H | -3.70122600 | -2.68497400 | -2.17574900 |
| O  | 4.44337900  | 0.04935000  | 0.37915000  | H | -6.22742700 | -0.84739200 | 0.77584800  |
| N  | -0.50987300 | 0.56342600  | 0.20558100  | C | -6.32618700 | -2.35664500 | -1.50661300 |
| S  | -1.40990200 | -0.23140700 | 1.41707100  | H | -6.51654900 | -1.79085800 | -2.42799000 |
| C  | 0.99075600  | 0.31284200  | 0.17242100  | H | -6.19290500 | -3.40562100 | -1.79454800 |
| H  | 1.34796900  | 0.26471900  | 1.20539500  | H | -7.22390500 | -2.28682000 | -0.88482700 |
| C  | 1.33192100  | -0.97486500 | -0.54856900 | C | -0.76742900 | 1.93150400  | -0.09879100 |
| H  | 0.90930400  | -1.85436000 | -0.05015300 | C | 0.40767100  | 2.56730900  | -0.51546400 |
| H  | 1.04028900  | -0.94336200 | -1.60737600 | C | -1.98517800 | 2.61176400  | -0.06663800 |
| C  | 1.55045900  | 1.58455500  | -0.52425700 | C | 0.38075200  | 3.90386200  | -0.89648200 |
| H  | 2.44848900  | 1.94649700  | -0.01467200 | C | -1.99716500 | 3.95791300  | -0.44485400 |
| H  | 1.84437400  | 1.34476200  | -1.55597100 | H | -2.89765000 | 2.12621000  | 0.25725600  |
| O  | -1.88248400 | 0.71421600  | 2.43345500  | C | -0.82964600 | 4.60525200  | -0.85553100 |
| O  | -0.59574500 | -1.38786700 | 1.80832200  | H | 1.29323500  | 4.39913200  | -1.21982200 |
| C  | -2.84846200 | -0.81017800 | 0.51618500  | H | -2.93542000 | 4.50514600  | -0.41310100 |
| C  | -2.69085600 | -1.58659800 | -0.63550200 | H | -0.86044200 | 5.65228800  | -1.14308500 |



**I-1F**

-----  
 # opt=calcfrc freq=noraman ub3lyp/genecp ginput temperature=383.15  
 -----

-----  
 - Thermochemistry -  
 -----

Zero-point correction= 0.388669 (Hartree/Particle)  
 Thermal correction to Energy= 0.437589  
 Thermal correction to Enthalpy= 0.438802  
 Thermal correction to Gibbs Free Energy= 0.285745  
 Sum of electronic and zero-point Energies= -1875.493255  
 Sum of electronic and thermal Energies= -1875.444335  
 Sum of electronic and thermal Enthalpies= -1875.443122  
 Sum of electronic and thermal Free Energies= -1875.596179

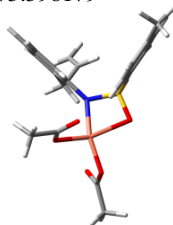

|    |             |             |             |   |             |             |             |
|----|-------------|-------------|-------------|---|-------------|-------------|-------------|
| Cu | -1.76120500 | -0.71854600 | -0.13946500 | H | 3.23893700  | 0.35357900  | -2.37402000 |
| O  | -3.87795700 | 0.22625700  | -1.20376900 | C | 4.29652000  | -2.36487200 | -0.58520800 |
| C  | -4.05540500 | -1.00318100 | -1.22617100 | H | 3.01503900  | -3.51910500 | 0.71428400  |
| C  | -5.33021300 | -1.60887500 | -1.80434000 | H | 5.28198600  | -1.01240300 | -1.94316200 |
| H  | -5.86418800 | -2.16137000 | -1.02268900 | C | 5.53113000  | -3.18964900 | -0.30021200 |
| H  | -5.07681000 | -2.32511500 | -2.59373300 | H | 5.89478300  | -3.02491800 | 0.72308200  |
| H  | -5.97654000 | -0.82574600 | -2.20770600 | H | 5.32770700  | -4.26313800 | -0.39787000 |
| O  | -3.19812900 | -1.85712400 | -0.76879000 | H | 6.34812100  | -2.93793400 | -0.98508400 |
| N  | -0.20188600 | 0.55376200  | -0.05689500 | C | 0.38208800  | 1.40418600  | 0.91793500  |
| S  | 0.52541900  | 0.14762900  | -1.43007300 | C | 0.26868400  | 2.81049900  | 0.83660300  |
| C  | 0.39949400  | 4.31091700  | -1.19154100 | C | 1.02692000  | 0.82602100  | 2.02602300  |
| H  | 1.13780800  | 3.73049300  | -1.74204100 | C | 0.85241900  | 3.58793400  | 1.84678800  |
| C  | 0.33052600  | 5.63478800  | -1.35113400 | C | 1.58728700  | 1.61828500  | 3.02455400  |
| H  | -0.40619600 | 6.23819500  | -0.82211500 | H | 1.05680800  | -0.25685900 | 2.09093300  |
| H  | 0.99792700  | 6.16658100  | -2.02588200 | C | 1.50970500  | 3.00999300  | 2.93086700  |
| C  | -0.49314800 | 3.50267400  | -0.28465300 | H | 0.78134800  | 4.67140500  | 1.77194100  |
| H  | -1.25373100 | 4.16166300  | 0.15608100  | H | 2.08125100  | 1.15001800  | 3.87310900  |
| H  | -1.01837500 | 2.74318200  | -0.87196200 | H | 1.94792100  | 3.64028600  | 3.70182900  |
| O  | 0.98396500  | 1.26231500  | -2.28241700 | C | -1.45801200 | -1.75442400 | 2.35036200  |
| O  | -0.48853800 | -0.80599500 | -1.99911300 | O | -2.19312000 | -0.86718500 | 1.77398500  |
| C  | 2.00582900  | -0.82620200 | -1.07635200 | C | -1.78673900 | -1.96709000 | 3.83069700  |
| C  | 1.92788000  | -1.91741600 | -0.20300300 | H | -1.60810100 | -1.03747700 | 4.38319500  |
| C  | 3.20723500  | -0.49676900 | -1.70163200 | H | -1.16999900 | -2.76639300 | 4.24890200  |
| C  | 3.07423800  | -2.67304800 | 0.03258100  | H | -2.84739500 | -2.21470300 | 3.94639500  |
| H  | 0.99716600  | -2.16187400 | 0.30526300  | O | -0.54231100 | -2.40333300 | 1.81549100  |
| C  | 4.34434500  | -1.26850500 | -1.45348800 |   |             |             |             |

TS-F

-----  
 # opt=(calcfc,ts,noeigen) freq=noraman ub3lyp/genecp ginput temperature=383.15  
 -----

- Thermochemistry -  
 -----

Zero-point correction= 0.388059 (Hartree/Particle)  
 Thermal correction to Energy= 0.435410  
 Thermal correction to Enthalpy= 0.436623  
 Thermal correction to Gibbs Free Energy= 0.289817  
 Sum of electronic and zero-point Energies= -1875.451013  
 Sum of electronic and thermal Energies= -1875.403662  
 Sum of electronic and thermal Enthalpies= -1875.402449  
 Sum of electronic and thermal Free Energies= -1875.549255

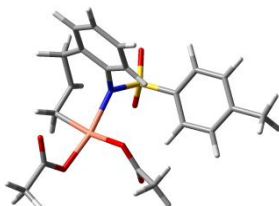

|    |             |             |             |   |             |             |             |
|----|-------------|-------------|-------------|---|-------------|-------------|-------------|
| Cu | 1.54830500  | 0.62739000  | -0.47510100 | H | -3.56956600 | -2.04706700 | -0.01672100 |
| O  | 3.89772700  | 0.62939900  | 1.14429700  | C | -4.59544300 | 1.17925600  | 0.48743300  |
| C  | 3.92478300  | 1.61463200  | 0.39284500  | H | -3.51741000 | 2.90946800  | -0.23364100 |
| C  | 5.06152700  | 2.64019300  | 0.50346300  | H | -5.40004500 | -0.73697000 | 1.06136000  |
| H  | 4.65345600  | 3.60465700  | 0.82796200  | C | -5.70226400 | 1.98447100  | 1.12916100  |
| H  | 5.52668300  | 2.79962700  | -0.47580900 | H | -5.29900400 | 2.74730500  | 1.80647900  |
| H  | 5.81251200  | 2.30282300  | 1.22263200  | H | -6.30191200 | 2.51163700  | 0.37522300  |
| O  | 3.05836200  | 1.89900400  | -0.52199400 | H | -6.38039500 | 1.34648900  | 1.70609500  |
| N  | 0.15666100  | -1.05986100 | -0.59701200 | C | 0.22166800  | -1.77922400 | 0.63274600  |
| S  | -1.25037400 | -1.24394500 | -1.51678800 | C | 1.08356800  | -2.88444100 | 0.60657700  |
| C  | 1.64201300  | -1.83876200 | -1.58513300 | C | -0.40887400 | -1.39184600 | 1.81917600  |
| H  | 1.11545500  | -1.94929800 | -2.52866800 | C | 1.28300200  | -3.63440100 | 1.76414700  |
| C  | 2.64844100  | -0.83783000 | -1.54600500 | C | -0.21714400 | -2.16118700 | 2.96828600  |
| H  | 3.47257000  | -0.94108800 | -0.84477000 | H | -1.00361700 | -0.48594700 | 1.83754800  |
| H  | 2.85397000  | -0.28270700 | -2.45850100 | C | 0.61902800  | -3.28113000 | 2.94237700  |
| C  | 1.73774700  | -3.11014200 | -0.73778700 | H | 1.95884500  | -4.48707100 | 1.75113400  |
| H  | 1.23535400  | -3.93356700 | -1.26287400 | H | -0.70517900 | -1.86986200 | 3.89519400  |
| H  | 2.79115300  | -3.38852600 | -0.61518700 | H | 0.77412100  | -3.86537800 | 3.84640000  |
| O  | -1.67893600 | -2.65732500 | -1.48998300 | C | 0.03856600  | 2.84241700  | 0.30076300  |
| O  | -0.96331100 | -0.60976400 | -2.81097500 | O | 0.47414000  | 1.72679600  | 0.77531900  |
| C  | -2.54567100 | -0.29309300 | -0.71496300 | C | -0.29806900 | 3.88764900  | 1.37301300  |
| C  | -2.52024400 | 1.10170800  | -0.79234100 | H | -0.97891400 | 3.45854000  | 2.11739500  |
| C  | -3.57377300 | -0.96310700 | -0.05205500 | H | -0.75049800 | 4.77553400  | 0.92262100  |
| C  | -3.54543300 | 1.82321200  | -0.18568700 | H | 0.61853000  | 4.17401300  | 1.90193700  |
| H  | -1.70508700 | 1.62449300  | -1.28512200 | O | -0.13150100 | 3.11085600  | -0.89984900 |
| C  | -4.59415300 | -0.22020700 | 0.54405300  |   |             |             |             |

I-2F

-----  
 # opt=calcf freq=noraman ub3lyp/genecp ginput temperature=383.15  
 -----

- Thermochemistry -  
 -----

Zero-point correction= 0.390007 (Hartree/Particle)  
 Thermal correction to Energy= 0.437713  
 Thermal correction to Enthalpy= 0.438926  
 Thermal correction to Gibbs Free Energy= 0.289660  
 Sum of electronic and zero-point Energies= -1875.477276  
 Sum of electronic and thermal Energies= -1875.429570  
 Sum of electronic and thermal Enthalpies= -1875.428357  
 Sum of electronic and thermal Free Energies= -1875.577623

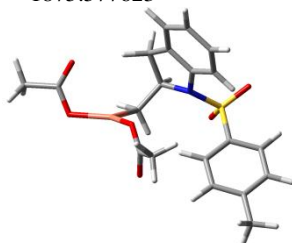

|    |             |             |             |   |             |             |             |
|----|-------------|-------------|-------------|---|-------------|-------------|-------------|
| Cu | -2.13006100 | -1.16929100 | -0.16783600 | H | 4.63599500  | 1.44045900  | -0.88605300 |
| O  | -4.67201300 | 0.25951300  | 0.02565900  | C | 4.47764800  | -1.87781300 | -0.06344000 |
| C  | -4.81577100 | -0.80372000 | -0.59456300 | H | 2.61979600  | -3.00842600 | -0.00506400 |
| C  | -6.20411600 | -1.22164000 | -1.09301300 | H | 6.09287400  | -0.45413600 | -0.18807800 |
| H  | -6.45972600 | -2.21308500 | -0.70219300 | C | 5.35159400  | -3.03119200 | 0.37334800  |
| H  | -6.19596000 | -1.30003100 | -2.18660300 | H | 4.99441600  | -3.46625900 | 1.31481000  |
| H  | -6.96018400 | -0.49580000 | -0.78329600 | H | 5.34700800  | -3.83734000 | -0.37153900 |
| O  | -3.87896200 | -1.64564100 | -0.89100000 | H | 6.39067900  | -2.71667200 | 0.51924100  |
| N  | 0.40191800  | 1.43966700  | -0.61751900 | C | 0.22903400  | 1.97119000  | 0.68532300  |
| S  | 1.84172700  | 1.61208700  | -1.46746400 | C | -1.09868300 | 2.37977500  | 0.86562200  |
| C  | -0.92145500 | 1.40858400  | -1.35332200 | C | 1.16865900  | 2.07519300  | 1.71043200  |
| H  | -0.77644700 | 1.96216100  | -2.28814900 | C | -1.50451400 | 2.88647700  | 2.09419500  |
| C  | -1.37935200 | -0.00282400 | -1.67336400 | C | 0.74883800  | 2.60170100  | 2.93660700  |
| H  | -2.25863900 | 0.03255200  | -2.32599700 | H | 2.19664900  | 1.76278700  | 1.56681300  |
| H  | -0.59165600 | -0.59109100 | -2.15534200 | C | -0.57463200 | 3.00001500  | 3.13568600  |
| C  | -1.88393900 | 2.19224900  | -0.41022900 | H | -2.53778900 | 3.19185400  | 2.24114100  |
| H  | -2.15304300 | 3.16706200  | -0.84189100 | H | 1.46868600  | 2.69087400  | 3.74695500  |
| H  | -2.81093800 | 1.62842100  | -0.25447900 | H | -0.88497000 | 3.39492600  | 4.09992100  |
| O  | 2.54252600  | 2.84793800  | -1.08363100 | C | -0.20595200 | -2.45842100 | 1.38318000  |
| O  | 1.51587200  | 1.37922200  | -2.88053600 | O | -1.06010500 | -1.48848300 | 1.40723400  |
| C  | 2.84521200  | 0.24848400  | -0.86856600 | C | 0.45420800  | -2.73226500 | 2.73850400  |
| C  | 2.27677400  | -1.00392600 | -0.62776100 | H | 1.14859700  | -1.91529600 | 2.96945400  |
| C  | 4.21711100  | 0.45499700  | -0.71212700 | H | 1.00558600  | -3.67610600 | 2.71728100  |
| C  | 3.09469600  | -2.05483500 | -0.21921000 | H | -0.29773900 | -2.75215900 | 3.53385500  |
| H  | 1.20967400  | -1.17043700 | -0.71889400 | O | 0.11693600  | -3.12211600 | 0.38585200  |
| C  | 5.02360700  | -0.61191900 | -0.31417300 |   |             |             |             |

**(OAc)(HOAc) Cu(I) (110 °C)**

-----  
# opt=calcfreq=noraman ub3lyp/genecp ginput temperature=383.15  
-----

-----  
- Thermochemistry -  
-----

Zero-point correction= 0.114591 (Hartree/Particle)  
Thermal correction to Energy= 0.131354  
Thermal correction to Enthalpy= 0.132567  
Thermal correction to Gibbs Free Energy= 0.056632  
Sum of electronic and zero-point Energies= -653.670140  
Sum of electronic and thermal Energies= -653.653377  
Sum of electronic and thermal Enthalpies= -653.652164  
Sum of electronic and thermal Free Energies= -653.728099

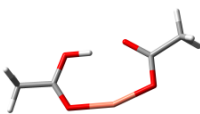

|    |             |             |             |   |             |            |             |
|----|-------------|-------------|-------------|---|-------------|------------|-------------|
| Cu | 0.08972900  | -1.12074700 | -0.00002600 | H | -3.90896700 | 1.30774700 | 0.88834200  |
| O  | 1.18365400  | 1.35017800  | -0.00018100 | H | -3.90724600 | 1.32685400 | -0.87436200 |
| C  | 2.10615200  | 0.49736400  | -0.00003200 | C | 3.54900300  | 0.96471700 | 0.00032800  |
| O  | 1.93623900  | -0.77988300 | 0.00011000  | H | 4.06149800  | 0.56821300 | 0.88320500  |
| C  | -2.18763600 | 0.41038900  | -0.00045400 | H | 4.06407900  | 0.56245100 | -0.87838800 |
| O  | -1.78870500 | -0.77527000 | -0.00028300 | H | 3.60396200  | 2.05419800 | -0.00294700 |
| C  | -3.65998600 | 0.71706300  | 0.00063900  | O | -1.42112900 | 1.46328400 | -0.00069200 |
| H  | -4.23816300 | -0.20683800 | -0.00919600 | H | -0.40296400 | 1.28535100 | -0.00040600 |

### OAc Cu(I) (110 °C)

# opt=calcfreq=noraman ub3lyp/genecp ginput temperature=383.15

- Thermochemistry -

Zero-point correction= 0.050872 (Hartree/Particle)  
Thermal correction to Energy= 0.059544  
Thermal correction to Enthalpy= 0.060758  
Thermal correction to Gibbs Free Energy= 0.007854  
Sum of electronic and zero-point Energies= -424.589041  
Sum of electronic and thermal Energies= -424.580369  
Sum of electronic and thermal Enthalpies= -424.579155  
Sum of electronic and thermal Free Energies= -424.632059

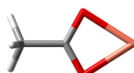

|    |             |             |             |   |             |             |             |
|----|-------------|-------------|-------------|---|-------------|-------------|-------------|
| Cu | 1.30468500  | -0.00022200 | 0.00386000  | C | -2.57908800 | 0.00007000  | 0.00562900  |
| O  | -0.44595500 | -1.11332600 | -0.00924300 | H | -2.91731400 | -0.03064800 | 1.04813600  |
| C  | -1.06303400 | 0.00065500  | -0.01502800 | H | -2.96825700 | 0.91092700  | -0.45354500 |
| O  | -0.44542600 | 1.11423000  | -0.00919800 | H | -2.96650700 | -0.88542900 | -0.50260400 |

### HOAc (110 °C)

# opt=calcfreq=noraman ub3lyp/genecp ginput temperature=383.15

- Thermochemistry -

Zero-point correction= 0.062023 (Hartree/Particle)  
Thermal correction to Energy= 0.068731  
Thermal correction to Enthalpy= 0.069945  
Thermal correction to Gibbs Free Energy= 0.025016  
Sum of electronic and zero-point Energies= -229.015587  
Sum of electronic and thermal Energies= -229.008878  
Sum of electronic and thermal Enthalpies= -229.007665  
Sum of electronic and thermal Free Energies= -229.052594

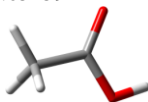

|   |             |             |             |   |             |             |             |
|---|-------------|-------------|-------------|---|-------------|-------------|-------------|
| O | 0.64568600  | 1.20201900  | 0.00001800  | H | -1.68533200 | -0.69151400 | 0.88206300  |
| C | 0.09249300  | 0.12562300  | 0.00000000  | H | -1.91752600 | 0.84835200  | -0.00005300 |
| C | -1.39757600 | -0.10985600 | -0.00000700 | O | 0.77867400  | -1.04660600 | -0.00001100 |
| H | -1.68531600 | -0.69159700 | -0.88202700 | H | 1.72379200  | -0.80314500 | 0.00000100  |

## Tempo (110 °C)

# opt=calcfc freq=noraman ub3lyp/genecp ginput temperature=383.15

- Thermochemistry -

Zero-point correction= 0.263368 (Hartree/Particle)  
Thermal correction to Energy= 0.282776  
Thermal correction to Enthalpy= 0.283990  
Thermal correction to Gibbs Free Energy= 0.211474  
Sum of electronic and zero-point Energies= -483.447721  
Sum of electronic and thermal Energies= -483.428313  
Sum of electronic and thermal Enthalpies= -483.427099  
Sum of electronic and thermal Free Energies= -483.499615

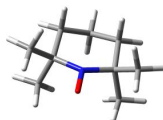

|   |             |             |             |   |             |             |             |
|---|-------------|-------------|-------------|---|-------------|-------------|-------------|
| C | -1.36073200 | 0.59053900  | 1.24717300  | H | 1.90768000  | 0.45011200  | 2.42312300  |
| C | -2.12489100 | 0.14140800  | 0.00000000  | H | 0.95425100  | 1.89090400  | 2.02861000  |
| C | -1.36073200 | 0.59053900  | -1.24717300 | C | 0.07136400  | -1.45949300 | 1.76108300  |
| C | 0.07136400  | 0.02351800  | -1.33128700 | H | 1.08577200  | -1.86108200 | 1.68435000  |
| C | 0.07136400  | 0.02351800  | 1.33128700  | H | -0.26294000 | -1.54944700 | 2.80100900  |
| H | -1.89525300 | 0.30475800  | -2.16158500 | H | -0.59053900 | -2.07239600 | 1.14150200  |
| H | -2.26645900 | -0.94678100 | 0.00000000  | C | 0.89265000  | 0.84283900  | -2.34092500 |
| H | -3.12932500 | 0.58209900  | 0.00000000  | H | 1.90768000  | 0.45011200  | -2.42312300 |
| H | -1.30610900 | 1.68793600  | 1.24566600  | H | 0.41189800  | 0.80269100  | -3.32483900 |
| H | -1.89525300 | 0.30475800  | 2.16158500  | H | 0.95425100  | 1.89090400  | -2.02861000 |
| H | -1.30610900 | 1.68793600  | -1.24566600 | C | 0.07136400  | -1.45949300 | -1.76108300 |
| N | 0.75681200  | 0.14853100  | 0.00000000  | H | -0.26294000 | -1.54944700 | -2.80100900 |
| O | 2.01777100  | -0.09991000 | 0.00000000  | H | 1.08577200  | -1.86108200 | -1.68435000 |
| C | 0.89265000  | 0.84283900  | 2.34092500  | H | -0.59053900 | -2.07239600 | -1.14150200 |
| H | 0.41189800  | 0.80269100  | 3.32483900  |   |             |             |             |

**I-1D**

-----  
# opt=calcf freq=noraman ub3lyp/genecp ginput temperature=403.15  
-----

-----  
- Thermochemistry -  
-----

Zero-point correction= 0.406350 (Hartree/Particle)  
Thermal correction to Energy= 0.458204  
Thermal correction to Enthalpy= 0.459481  
Thermal correction to Gibbs Free Energy= 0.294872  
Sum of electronic and zero-point Energies= -1762.885616  
Sum of electronic and thermal Energies= -1762.833762  
Sum of electronic and thermal Enthalpies= -1762.832485  
Sum of electronic and thermal Free Energies= -1762.997094

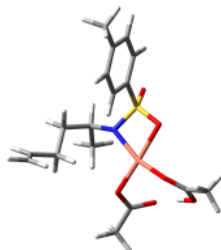

|    |             |             |             |   |             |             |             |
|----|-------------|-------------|-------------|---|-------------|-------------|-------------|
| O  | -2.61155500 | 0.94646500  | 0.46925400  | H | 1.11949200  | 3.89327300  | -1.11239600 |
| C  | -3.72241700 | 0.69243000  | -0.12167500 | O | 0.07840000  | -1.74017800 | -0.70166300 |
| C  | -4.80358600 | 1.75089400  | -0.02545800 | O | 1.20233500  | -0.78651900 | -2.79872000 |
| H  | -5.76660300 | 1.27696900  | 0.18454200  | H | 1.08522700  | 1.80092600  | -2.30050100 |
| H  | -4.56765000 | 2.49319700  | 0.73893000  | C | -0.97226800 | 2.35148100  | -2.20804700 |
| H  | -4.89061600 | 2.25207300  | -0.99665400 | H | -0.84368200 | 3.31829900  | -2.70980600 |
| O  | -3.93464100 | -0.35153000 | -0.78934300 | H | -1.25419600 | 1.60745000  | -2.95977500 |
| Cu | -1.29421700 | -0.42110900 | 0.05286200  | H | -1.78945300 | 2.43998100  | -1.48760200 |
| O  | -1.96758900 | -1.84690000 | 1.30639100  | H | 1.82833500  | 2.61682100  | -0.12866600 |
| C  | -2.82382700 | -2.73663100 | 1.15750400  | C | 2.55657000  | -0.77121200 | -0.55118800 |
| C  | -2.78356800 | -3.99159900 | 1.98591400  | C | 3.64581900  | -1.27034400 | -1.26677500 |
| H  | -2.30730700 | -4.78198000 | 1.39340900  | C | 2.69499200  | -0.38411200 | 0.78529200  |
| H  | -2.19215100 | -3.82577300 | 2.88716400  | C | 4.88216700  | -1.38428200 | -0.63158900 |
| H  | -3.79474600 | -4.32089900 | 2.23594900  | H | 3.51906500  | -1.55992800 | -2.30411900 |
| N  | 0.16472100  | 0.62691100  | -0.83195600 | C | 3.93696500  | -0.50379400 | 1.40220500  |
| S  | 0.95624000  | -0.66949600 | -1.35606700 | H | 1.84507300  | 0.01686700  | 1.32764200  |
| C  | 0.59096400  | 4.34486200  | 1.57668800  | C | 5.04921600  | -1.00375900 | 0.70650300  |
| H  | 0.90274300  | 5.29410500  | 1.13523500  | H | 5.73121100  | -1.77507500 | -1.18693900 |
| C  | 0.81033100  | 4.13651000  | 2.87596000  | H | 4.04677900  | -0.20184300 | 2.44091600  |
| H  | 0.51612300  | 3.20788200  | 3.36212600  | C | 6.39856900  | -1.09888900 | 1.37800600  |
| H  | 1.28340000  | 4.88540700  | 3.50602600  | H | 7.03032100  | -1.85598600 | 0.90267500  |
| C  | 0.32918900  | 1.93133800  | -1.51420800 | H | 6.93433500  | -0.14200400 | 1.32057100  |
| C  | -0.05187900 | 3.36355000  | 0.63396200  | H | 6.30140100  | -1.35240400 | 2.43904400  |
| H  | -0.97650800 | 3.80241100  | 0.23329700  | O | -3.79518400 | -2.68630400 | 0.28848900  |
| H  | -0.35036600 | 2.46147400  | 1.17903500  | H | -3.80441500 | -1.78599900 | -0.19838900 |
| C  | 0.87934000  | 2.98859000  | -0.53462800 |   |             |             |             |

*cis*-TS-D<sub>ch</sub>

-----  
# opt=(calcfc,ts,noeigen) freq=noraman ub3lyp/genecp gfinput temperature=403.15  
-----

-----  
- Thermochemistry -  
-----

Zero-point correction= 0.406492 (Hartree/Particle)  
Thermal correction to Energy= 0.456322  
Thermal correction to Enthalpy= 0.457598  
Thermal correction to Gibbs Free Energy= 0.304075  
Sum of electronic and zero-point Energies= -1762.866187  
Sum of electronic and thermal Energies= -1762.816358  
Sum of electronic and thermal Enthalpies= -1762.815081  
Sum of electronic and thermal Free Energies= -1762.968604

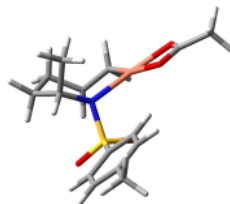

|    |             |             |             |   |             |             |             |
|----|-------------|-------------|-------------|---|-------------|-------------|-------------|
| O  | -0.54327200 | 1.73132900  | 0.10161600  | H | 0.13091400  | -3.33245000 | 2.99211300  |
| C  | -0.82978000 | 2.68506100  | 0.83788600  | O | 1.76413900  | -2.84689300 | -0.92203800 |
| C  | 0.15566000  | 3.79849800  | 1.09860500  | O | 0.45651100  | -1.04543400 | -2.17006900 |
| H  | 0.11564700  | 4.10426100  | 2.14748900  | H | 1.58445400  | -1.52868500 | 1.70554800  |
| H  | 1.16288600  | 3.47868000  | 0.82812000  | C | -0.11692900 | -0.63618000 | 2.64743100  |
| H  | -0.12094400 | 4.66801800  | 0.49077900  | H | 0.19448800  | -0.88601700 | 3.66840600  |
| O  | -1.97675100 | 2.84433000  | 1.44628300  | H | 0.21486900  | 0.38068600  | 2.42289700  |
| Cu | -1.52232600 | -0.10060500 | -0.41381400 | H | -1.21219500 | -0.64878300 | 2.61479800  |
| O  | -3.01807500 | 0.75901500  | -1.36013100 | H | 0.80364600  | -3.75211700 | 1.40608100  |
| C  | -3.93104500 | 1.17419800  | -0.57260100 | C | 2.51609400  | -0.34477500 | -0.63323700 |
| C  | -5.23486800 | 1.63552300  | -1.20089000 | C | 2.38351200  | 0.99918400  | -0.99382300 |
| H  | -5.33695600 | 2.71770700  | -1.05965800 | C | 3.70061100  | -0.82331900 | -0.06955500 |
| H  | -5.26988400 | 1.40397300  | -2.26677500 | C | 3.44979600  | 1.86604200  | -0.76774000 |
| H  | -6.07535200 | 1.16271300  | -0.68316500 | H | 1.46527700  | 1.35422300  | -1.44504300 |
| N  | 0.04197200  | -1.30897800 | 0.27088200  | C | 4.75426400  | 0.06292600  | 0.15534700  |
| S  | 1.17666000  | -1.49543000 | -0.96521300 | H | 3.80066900  | -1.87900600 | 0.15851200  |
| C  | -1.34916700 | -2.71162200 | -0.06240900 | C | 4.64613600  | 1.41755800  | -0.18458400 |
| H  | -0.76906100 | -3.26676200 | -0.79582800 | H | 3.35816500  | 2.90887800  | -1.06301900 |
| C  | -2.47955200 | -1.99334400 | -0.53648400 | H | 5.67958500  | -0.30871000 | 0.58840100  |
| H  | -3.31143900 | -1.82168500 | 0.14461800  | C | 5.78303400  | 2.37771600  | 0.07311800  |
| H  | -2.71755200 | -2.01701000 | -1.59594700 | H | 6.72668300  | 1.84801300  | 0.23615800  |
| C  | 0.49312100  | -1.62664700 | 1.65162200  | H | 5.92106600  | 3.06832600  | -0.76617600 |
| C  | -1.30391500 | -3.28345900 | 1.33552100  | H | 5.58923700  | 2.98797800  | 0.96519000  |
| H  | -1.56202900 | -4.34904600 | 1.27715700  | O | -3.81100800 | 1.22846200  | 0.68431400  |
| H  | -2.06553600 | -2.80151000 | 1.95958500  | H | -2.66237400 | 2.12592500  | 1.17128800  |
| C  | 0.09810500  | -3.09349600 | 1.92288100  |   |             |             |             |



*cis-I-2D*

-----  
# opt=calcf freq=noraman ub3lyp/genecp ginput temperature=403.15  
-----

- Thermochemistry -  
-----

Zero-point correction= 0.407122 (Hartree/Particle)  
Thermal correction to Energy= 0.457394  
Thermal correction to Enthalpy= 0.458671  
Thermal correction to Gibbs Free Energy= 0.301450  
Sum of electronic and zero-point Energies= -1762.876555  
Sum of electronic and thermal Energies= -1762.826283  
Sum of electronic and thermal Enthalpies= -1762.825006  
Sum of electronic and thermal Free Energies= -1762.982227

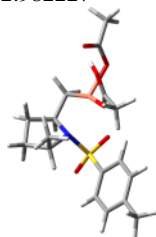

|    |             |             |             |   |             |             |             |
|----|-------------|-------------|-------------|---|-------------|-------------|-------------|
| O  | -0.75440500 | 1.67530600  | 0.21840200  | H | 0.48613100  | -3.08369800 | 3.27380200  |
| C  | -1.18868000 | 2.62712600  | 0.89588600  | O | 2.06219500  | -2.79514200 | -1.05344100 |
| C  | -0.29467200 | 3.79661500  | 1.23522500  | O | 0.50214300  | -1.11829400 | -2.17464300 |
| H  | -0.43374300 | 4.08634300  | 2.28040500  | H | 1.99601000  | -1.61158500 | 1.53385700  |
| H  | 0.74957600  | 3.54694000  | 1.04218900  | C | 0.50778800  | -0.48631500 | 2.58669800  |
| H  | -0.58142100 | 4.65508300  | 0.61674600  | H | 1.03367000  | -0.56825100 | 3.54532100  |
| O  | -2.39514400 | 2.72956800  | 1.35826400  | H | 0.76160800  | 0.47296000  | 2.12834800  |
| Cu | -1.59322700 | -0.12518200 | -0.34734300 | H | -0.56937200 | -0.49168100 | 2.78721800  |
| O  | -3.18373500 | 0.52816500  | -1.37123400 | H | 1.14287800  | -3.79704200 | 1.78834900  |
| C  | -4.18339800 | 0.87030900  | -0.66433700 | C | 2.52271200  | -0.22525700 | -0.68455900 |
| C  | -5.53086400 | 0.97266600  | -1.35941400 | C | 2.18640200  | 1.11270300  | -0.90708600 |
| H  | -5.87346000 | 2.01309700  | -1.33221300 | C | 3.81413800  | -0.59008300 | -0.29653900 |
| H  | -5.47169700 | 0.63201000  | -2.39438200 | C | 3.15842700  | 2.09070900  | -0.70885600 |
| H  | -6.26704300 | 0.37707000  | -0.80965400 | H | 1.18696500  | 1.38460400  | -1.22204700 |
| N  | 0.23637400  | -1.50148300 | 0.32248000  | C | 4.77047900  | 0.40524700  | -0.10190100 |
| S  | 1.33091500  | -1.51895500 | -1.03057600 | H | 4.06377600  | -1.63846600 | -0.17381500 |
| C  | -0.80303900 | -2.65361300 | 0.15617100  | C | 4.45923600  | 1.75750500  | -0.29969200 |
| H  | -0.34360300 | -3.42080000 | -0.47796800 | H | 2.90587400  | 3.13275900  | -0.89014600 |
| C  | -2.05832200 | -2.06931400 | -0.44373000 | H | 5.77763200  | 0.12491500  | 0.19567700  |
| H  | -2.96693000 | -2.23843300 | 0.13895200  | C | 5.49288100  | 2.83395700  | -0.07006400 |
| H  | -2.20820200 | -2.27082100 | -1.50460600 | H | 6.50909000  | 2.42985300  | -0.10984100 |
| C  | 0.91184100  | -1.64234400 | 1.67090200  | H | 5.41269900  | 3.63087100  | -0.81715700 |
| C  | -0.92882700 | -3.19853600 | 1.58340700  | H | 5.36226300  | 3.29955700  | 0.91582700  |
| H  | -1.27042700 | -4.23811300 | 1.57242700  | O | -4.13797600 | 1.13203900  | 0.57430600  |
| H  | -1.66911000 | -2.61286300 | 2.14261700  | H | -3.05750000 | 1.96730800  | 1.02655300  |
| C  | 0.46957100  | -3.02651100 | 2.18041000  |   |             |             |             |

I-3D

-----  
 # opt=calcfrc freq=noraman ub3lyp/genecp ginput temperature=403.15  
 -----

- Thermochemistry -  
 -----

Zero-point correction= 0.408400 (Hartree/Particle)  
 Thermal correction to Energy= 0.459096  
 Thermal correction to Enthalpy= 0.460372  
 Thermal correction to Gibbs Free Energy= 0.297983  
 Sum of electronic and zero-point Energies= -1762.875589  
 Sum of electronic and thermal Energies= -1762.824893  
 Sum of electronic and thermal Enthalpies= -1762.823617  
 Sum of electronic and thermal Free Energies= -1762.986006

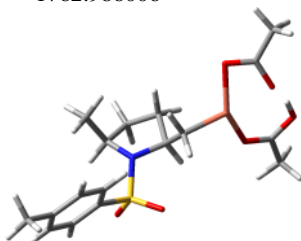

|    |             |             |             |   |             |             |             |
|----|-------------|-------------|-------------|---|-------------|-------------|-------------|
| O  | -3.08914000 | -1.35071700 | -0.68122500 | H | 0.34082200  | -1.07298400 | 3.93888900  |
| C  | -4.18400700 | -1.90667800 | -0.84405400 | O | 2.69255700  | -2.61792900 | 0.17294800  |
| C  | -4.29263000 | -3.39308800 | -1.05256700 | O | 1.46427400  | -1.26718200 | -1.59387400 |
| H  | -4.58577600 | -3.58699300 | -2.09063800 | H | 2.50478200  | -1.40319900 | 2.29750100  |
| H  | -3.33346500 | -3.87054700 | -0.85185400 | C | 2.13748200  | 0.64372100  | 2.86919400  |
| H  | -5.07370600 | -3.80805400 | -0.40892300 | H | 2.44636400  | 0.48159700  | 3.90916700  |
| O  | -5.34239500 | -1.28282100 | -0.86525000 | H | 2.98523800  | 1.06448300  | 2.31979300  |
| Cu | -2.66882400 | 0.67992400  | -0.36920500 | H | 1.33165100  | 1.38611900  | 2.86376400  |
| O  | -3.40463600 | 2.42312400  | 0.58861600  | H | 0.38038700  | -2.34255000 | 2.70043400  |
| C  | -4.53494900 | 2.22919300  | 0.06640800  | C | 3.68177300  | -0.27489600 | -0.50328200 |
| C  | -5.70088300 | 3.13695100  | 0.37320000  | C | 3.53690400  | 1.06341300  | -0.88382800 |
| H  | -6.54438400 | 2.54280700  | 0.74033300  | C | 4.94487000  | -0.83069000 | -0.31269300 |
| H  | -5.42417500 | 3.88933900  | 1.11308600  | C | 4.67326600  | 1.84493100  | -1.06164300 |
| H  | -6.02786900 | 3.62813600  | -0.54971300 | H | 2.54648000  | 1.48212200  | -1.02971800 |
| N  | 1.31301600  | -0.48620900 | 0.80355900  | C | 6.07554000  | -0.03150800 | -0.49718900 |
| S  | 2.22960500  | -1.31710200 | -0.34166000 | H | 5.03262300  | -1.87270400 | -0.02495500 |
| C  | -0.19216200 | -0.52859800 | 0.61354800  | C | 5.96004700  | 1.31180300  | -0.87159600 |
| H  | -0.45848100 | -1.45335300 | 0.09326600  | H | 4.56391700  | 2.88640800  | -1.35526000 |
| C  | -0.68566100 | 0.65713400  | -0.18662700 | H | 7.06243200  | -0.46253800 | -0.34810600 |
| H  | -0.35464300 | 0.62570400  | -1.23000600 | C | 7.18233700  | 2.17814400  | -1.06425800 |
| H  | -0.44733300 | 1.61740000  | 0.28230800  | H | 8.10490600  | 1.60054800  | -0.95196200 |
| C  | 1.68788200  | -0.67864200 | 2.23815400  | H | 7.19143400  | 2.63750900  | -2.06008700 |
| C  | -0.71541500 | -0.57990500 | 2.06353600  | H | 7.20875100  | 2.99612800  | -0.33319100 |
| H  | -1.66690000 | -1.11919500 | 2.11544600  | O | -4.69764000 | 1.25374000  | -0.75758500 |
| H  | -0.89291500 | 0.43787100  | 2.43149300  | H | -5.21531100 | -0.28831400 | -0.77771100 |
| C  | 0.40429300  | -1.25831100 | 2.86140000  |   |             |             |             |

### I-4D/E

-----  
# opt=calcf freq=noraman ub3lyp/genecp ginput temperature=403.15  
-----

-----  
- Thermochemistry -  
-----

Zero-point correction= 0.290285 (Hartree/Particle)  
Thermal correction to Energy= 0.320721  
Thermal correction to Enthalpy= 0.321997  
Thermal correction to Gibbs Free Energy= 0.217461  
Sum of electronic and zero-point Energies= -1109.182967  
Sum of electronic and thermal Energies= -1109.152531  
Sum of electronic and thermal Enthalpies= -1109.151254  
Sum of electronic and thermal Free Energies= -1109.255791

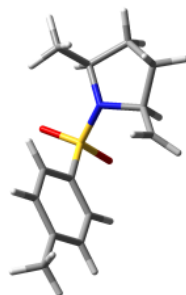

|   |            |             |             |   |             |             |             |
|---|------------|-------------|-------------|---|-------------|-------------|-------------|
| N | 1.50935800 | 0.05735200  | -0.08350500 | H | 1.82040300  | -1.84470400 | -2.03304200 |
| S | 0.48863700 | -0.85289800 | 0.91526500  | H | 2.41849100  | -0.29248400 | -2.66184000 |
| C | 1.74693000 | 1.47622000  | 0.32559000  | H | 4.31431800  | 0.41728900  | 0.61851000  |
| H | 1.96518800 | 1.51868000  | 1.40187400  | C | -1.15461900 | -0.40190700 | 0.35369300  |
| C | 0.59565300 | 2.36350600  | 0.01170400  | C | -1.55477200 | -0.72821800 | -0.94580600 |
| H | 0.08445200 | 2.26945100  | -0.94063000 | C | -2.03722000 | 0.20806500  | 1.24219700  |
| H | 0.33418500 | 3.18633600  | 0.66767700  | C | -2.84765600 | -0.41997500 | -1.35443200 |
| C | 2.77970300 | -0.61000200 | -0.53501600 | H | -0.86135500 | -1.21521900 | -1.62349900 |
| C | 3.04470800 | 1.80572600  | -0.45351500 | C | -3.33315000 | 0.50677900  | 0.81631700  |
| H | 3.56079700 | 2.66658600  | -0.01859500 | H | -1.70800500 | 0.43992700  | 2.24911700  |
| H | 2.79743400 | 2.04883900  | -1.49330100 | C | -3.75719500 | 0.20297600  | -0.48230000 |
| C | 3.84054600 | 0.49892700  | -0.36672800 | H | -3.16200200 | -0.67033400 | -2.36506700 |
| H | 4.62854900 | 0.42563000  | -1.12321100 | H | -4.02441100 | 0.98267800  | 1.50735400  |
| O | 0.72654100 | -2.25776700 | 0.55854400  | C | -5.15646800 | 0.53261800  | -0.94593800 |
| O | 0.60569800 | -0.41543900 | 2.31524900  | H | -5.75604900 | 0.96217000  | -0.13771100 |
| H | 3.00308300 | -1.46136500 | 0.11267700  | H | -5.14135200 | 1.25500500  | -1.77180600 |
| C | 2.63388100 | -1.11588900 | -1.97091300 | H | -5.67543400 | -0.36177800 | -1.31141700 |
| H | 3.55804900 | -1.60910800 | -2.29625100 |   |             |             |             |

-----  
 # opt=calcf freq=noraman ub3lyp/genecp gfinput temperature=403.15  
 -----

- Thermochemistry -  
 -----

Zero-point correction= 0.562220 (Hartree/Particle)  
 Thermal correction to Energy= 0.613717  
 Thermal correction to Enthalpy= 0.614994  
 Thermal correction to Gibbs Free Energy= 0.466306  
 Sum of electronic and zero-point Energies= -1592.687734  
 Sum of electronic and thermal Energies= -1592.636237  
 Sum of electronic and thermal Enthalpies= -1592.634960  
 Sum of electronic and thermal Free Energies= -1592.783648

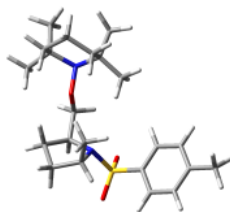

|   |             |             |             |   |             |             |             |
|---|-------------|-------------|-------------|---|-------------|-------------|-------------|
| N | 0.95585000  | -1.34833900 | 0.06422300  | H | 5.68789100  | 4.16188600  | -0.14475500 |
| S | 2.31756200  | -1.42518200 | -0.95183900 | H | 5.14396300  | 3.97485400  | 1.52311700  |
| C | -0.23209100 | -2.10003200 | -0.48089300 | H | 6.62286000  | 3.16675900  | 0.98529500  |
| H | 0.10130300  | -2.75877000 | -1.29047900 | C | -2.53767800 | 1.83735100  | -0.30185100 |
| C | -1.27963200 | -1.17765800 | -1.10523200 | C | -2.73274600 | 2.09118400  | 1.21293800  |
| H | -0.79325000 | -0.50149200 | -1.81370500 | C | -4.12830900 | 1.69827400  | 1.71440800  |
| H | -1.99772300 | -1.79234800 | -1.66340800 | C | -4.44791100 | 0.24537500  | 1.34076600  |
| C | 1.20413300  | -1.75218900 | 1.48654100  | C | -4.28743900 | -0.03890800 | -0.17196700 |
| C | -0.73052800 | -2.95650700 | 0.70507200  | H | -4.17838900 | 1.82040200  | 2.80383800  |
| H | -1.13438900 | -3.91295300 | 0.35855400  | H | -1.98065500 | 1.50858700  | 1.75980700  |
| H | -1.52759700 | -2.42895000 | 1.23514200  | H | -2.53109400 | 3.14878100  | 1.42901200  |
| C | 0.50269500  | -3.11750600 | 1.60234100  | H | -3.77026800 | -0.42056100 | 1.89022500  |
| H | 0.25133300  | -3.37596000 | 2.63642700  | H | -5.46839500 | -0.01597200 | 1.65081000  |
| O | 3.13750600  | -2.61712100 | -0.67186900 | H | -4.88791600 | 2.37458600  | 1.30094900  |
| O | 1.81140400  | -1.19869900 | -2.31171100 | N | -2.94925800 | 0.43523100  | -0.69314400 |
| H | 2.28059800  | -1.85757600 | 1.64576700  | O | -1.95576200 | -0.44538200 | -0.08423700 |
| C | 0.65850600  | -0.68353800 | 2.43704400  | C | -3.31758800 | 2.86827500  | -1.14952100 |
| H | 0.82061900  | -0.98259400 | 3.47975700  | H | -2.78423500 | 3.82479500  | -1.11958800 |
| H | 1.16805100  | 0.27054800  | 2.26800400  | H | -3.37044700 | 2.54271700  | -2.19295100 |
| H | -0.41264500 | -0.52378800 | 2.27969000  | H | -4.33078200 | 3.06107300  | -0.79561400 |
| H | 1.16551400  | -3.89449900 | 1.20509200  | C | -1.05245300 | 2.02624400  | -0.66308400 |
| C | 3.26507000  | 0.00529000  | -0.43285200 | H | -0.89592900 | 1.89183800  | -1.73974200 |
| C | 4.48883900  | -0.17887400 | 0.20845400  | H | -0.75020500 | 3.04768100  | -0.40393400 |
| C | 2.79920000  | 1.28794700  | -0.73773100 | H | -0.41167400 | 1.32876800  | -0.12295800 |
| C | 5.24463700  | 0.93960000  | 0.56510600  | C | -4.40697400 | -1.55487200 | -0.41875000 |
| H | 4.84400800  | -1.18406700 | 0.40844800  | H | -4.32316500 | -1.78626600 | -1.48641600 |
| C | 3.56581000  | 2.39051300  | -0.37511900 | H | -3.64998200 | -2.12050000 | 0.12596000  |
| H | 1.85754300  | 1.41445100  | -1.26056700 | C | -5.42527700 | 0.61170600  | -0.99130400 |
| C | 4.79728300  | 2.23600900  | 0.28387800  | H | -5.18288000 | 0.59788500  | -2.05841200 |
| H | 6.20097200  | 0.79936000  | 1.06267600  | H | -6.34306700 | 0.03186000  | -0.84385800 |
| H | 3.20844300  | 3.38953900  | -0.61334800 | H | -5.65055800 | 1.63821400  | -0.70221100 |
| C | 5.60939200  | 3.44582400  | 0.68130500  | H | -5.39181300 | -1.89505000 | -0.07950600 |

*cis*-TS-D<sub>bt</sub>

-----  
# opt=(calcfc,ts,noeigen) freq=noraman ub3lyp/genecp gfinput temperature=403.15  
-----

-----  
- Thermochemistry -  
-----

Zero-point correction= 0.406722 (Hartree/Particle)  
Thermal correction to Energy= 0.456519  
Thermal correction to Enthalpy= 0.457795  
Thermal correction to Gibbs Free Energy= 0.304462  
Sum of electronic and zero-point Energies= -1762.866054  
Sum of electronic and thermal Energies= -1762.816257  
Sum of electronic and thermal Enthalpies= -1762.814980  
Sum of electronic and thermal Free Energies= -1762.968314

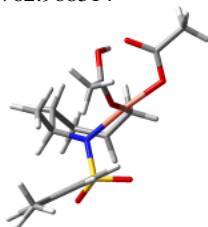

|    |             |             |             |   |             |             |             |
|----|-------------|-------------|-------------|---|-------------|-------------|-------------|
| O  | -3.08518800 | 0.86321400  | -1.29953200 | H | -1.86053100 | -1.60480300 | 2.35675600  |
| C  | -3.86396600 | 1.34860900  | -0.41419100 | H | -0.82353800 | -2.76025200 | 3.20021700  |
| C  | -5.18563400 | 1.92672600  | -0.88861200 | O | 1.65767600  | -2.99757400 | -0.67778400 |
| H  | -5.99341700 | 1.57393500  | -0.24041700 | O | 0.52351100  | -1.26735900 | -2.17773600 |
| H  | -5.15040900 | 3.01872600  | -0.79708500 | H | 1.04757100  | -2.28444800 | 1.72932900  |
| H  | -5.38842100 | 1.66037300  | -1.92741200 | C | 0.52524600  | -0.31371200 | 2.45061500  |
| Cu | -1.56538900 | -0.07427500 | -0.46874900 | H | 0.74444200  | -0.56449500 | 3.49555300  |
| O  | -0.42371300 | 1.71735900  | -0.17538200 | H | 1.39571200  | 0.19988900  | 2.03347700  |
| C  | -0.54449000 | 2.67400700  | 0.59994200  | H | -0.32404700 | 0.37729200  | 2.43973900  |
| C  | 0.51906100  | 3.73854100  | 0.70943600  | C | 2.49237000  | -0.51082100 | -0.56820900 |
| H  | 0.54468800  | 4.15621000  | 1.71847200  | C | 2.48212800  | 0.76620300  | -1.13426600 |
| H  | 1.49039900  | 3.32401400  | 0.43502800  | C | 3.57920700  | -0.95116400 | 0.19125500  |
| H  | 0.27613400  | 4.55100300  | 0.01394100  | C | 3.57129700  | 1.60867200  | -0.91864100 |
| O  | -1.57911400 | 2.87856800  | 1.37862600  | H | 1.64080800  | 1.08533400  | -1.73716900 |
| N  | -0.09470700 | -1.34068200 | 0.23546400  | C | 4.65470500  | -0.08985800 | 0.40321800  |
| S  | 1.13068300  | -1.63761800 | -0.88824800 | H | 3.59083100  | -1.96325100 | 0.58112200  |
| C  | -1.51590200 | -2.71883300 | -0.17958800 | C | 4.66787700  | 1.20130200  | -0.14300000 |
| H  | -0.99332200 | -3.21861000 | -0.99006400 | H | 3.57763000  | 2.59590800  | -1.37493700 |
| C  | -2.62754600 | -1.91626500 | -0.54671200 | H | 5.50482600  | -0.43280500 | 0.98781300  |
| H  | -3.41229000 | -1.72689000 | 0.18390100  | C | 5.82930000  | 2.13467600  | 0.10381800  |
| H  | -2.92553600 | -1.88033100 | -1.59095900 | H | 6.75662300  | 1.58176300  | 0.28506300  |
| C  | 0.19936500  | -1.58913300 | 1.66795100  | H | 5.99267400  | 2.80473300  | -0.74674100 |
| C  | -1.41581300 | -3.37813900 | 1.18044700  | H | 5.64798300  | 2.76502700  | 0.98475000  |
| H  | -0.64650700 | -4.15718200 | 1.15052900  | O | -3.59249600 | 1.38185000  | 0.82043700  |
| H  | -2.37188800 | -3.85488500 | 1.42764000  | H | -2.33726700 | 2.21241200  | 1.18649600  |
| C  | -1.03724400 | -2.31856200 | 2.22043400  |   |             |             |             |

*trans*-TS-D<sub>ch</sub>

-----  
# opt=(calcfc,ts,noeigen) freq=noraman ub3lyp/genecp ginput temperature=403.15  
-----

-----  
- Thermochemistry -  
-----

Zero-point correction= 0.406896 (Hartree/Particle)  
Thermal correction to Energy= 0.456620  
Thermal correction to Enthalpy= 0.457897  
Thermal correction to Gibbs Free Energy= 0.305228  
Sum of electronic and zero-point Energies= -1762.861287  
Sum of electronic and thermal Energies= -1762.811563  
Sum of electronic and thermal Enthalpies= -1762.810286  
Sum of electronic and thermal Free Energies= -1762.962955

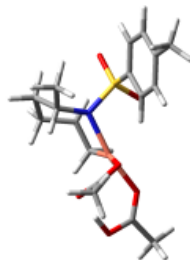

|    |             |             |             |   |             |             |             |
|----|-------------|-------------|-------------|---|-------------|-------------|-------------|
| O  | -2.96700900 | -0.87223900 | -1.38261000 | H | 1.84512200  | 1.53480500  | 3.29705800  |
| C  | -4.05685600 | -1.32225700 | -1.00057400 | H | 1.96356400  | 0.15721200  | 2.18678500  |
| C  | -5.09612000 | -1.79450100 | -1.98397900 | H | 2.63057600  | 1.73782300  | 1.72392000  |
| H  | -4.77138700 | -1.58704400 | -3.00368600 | C | 0.17513300  | 3.15227100  | 1.75603600  |
| H  | -6.05072300 | -1.29921800 | -1.78014100 | H | 0.14360100  | 3.49562500  | 2.79683500  |
| H  | -5.25353000 | -2.87094300 | -1.85611700 | H | -0.32374400 | 1.12523300  | 2.26323500  |
| Cu | -1.46877300 | 0.04600100  | -0.30403500 | O | 2.00398200  | 2.58710100  | -0.95145900 |
| O  | -0.80648300 | -1.71186900 | 0.54054000  | O | 0.55002400  | 0.87413100  | -2.14583500 |
| C  | -1.47937600 | -1.80733700 | 1.61219900  | H | 0.97576400  | 3.69453600  | 1.24105100  |
| C  | -1.11895800 | -2.89818000 | 2.60395600  | C | 2.56455800  | 0.03060400  | -0.63557400 |
| H  | -1.13649800 | -2.49662400 | 3.62127200  | C | 3.90372700  | 0.41740700  | -0.71137500 |
| H  | -0.14141600 | -3.33044600 | 2.38179000  | C | 2.21043600  | -1.30545800 | -0.42763100 |
| H  | -1.87761600 | -3.68846100 | 2.55461400  | C | 4.89969600  | -0.54800600 | -0.56791700 |
| O  | -2.45416300 | -1.03546300 | 1.88334200  | H | 4.15263200  | 1.45827500  | -0.88575400 |
| N  | 0.15427800  | 1.22372800  | 0.27239400  | C | 3.22276600  | -2.25127900 | -0.27891600 |
| S  | 1.31125900  | 1.28394100  | -0.94971700 | H | 1.17065200  | -1.60387800 | -0.35015900 |
| C  | -1.17303500 | 2.65274900  | -0.27781200 | C | 4.57808200  | -1.89340200 | -0.34670400 |
| H  | -0.53319500 | 3.09142100  | -1.03861700 | H | 5.94327900  | -0.24952300 | -0.63237500 |
| C  | -2.30753600 | 1.92429300  | -0.72643800 | H | 2.95213300  | -3.29123500 | -0.11148100 |
| H  | -3.18779000 | 1.90111300  | -0.08404700 | C | 5.65980200  | -2.93134300 | -0.16276200 |
| H  | -2.48786100 | 1.84836000  | -1.79545100 | H | 6.60734100  | -2.60591500 | -0.60386500 |
| C  | 0.44462900  | 1.64129200  | 1.67332100  | H | 5.84334200  | -3.12553400 | 0.90250600  |
| C  | -1.16471800 | 3.37441200  | 1.04867800  | H | 5.38039400  | -3.88600500 | -0.62154900 |
| H  | -1.34250900 | 4.44078000  | 0.85570200  | O | -4.41927300 | -1.43842900 | 0.25295400  |
| H  | -1.99091200 | 3.01175000  | 1.67277100  | H | -3.65363500 | -1.20498600 | 0.89356200  |
| C  | 1.80779000  | 1.23770800  | 2.24256100  |   |             |             |             |

*trans*-TS-D<sub>bt</sub>

-----  
# opt=(calcfc,ts,noeigen) freq=noraman ub3lyp/genecp ginput temperature=403.15  
-----

-----  
- Thermochemistry -  
-----

Zero-point correction= 0.406102 (Hartree/Particle)  
Thermal correction to Energy= 0.456085  
Thermal correction to Enthalpy= 0.457361  
Thermal correction to Gibbs Free Energy= 0.302698  
Sum of electronic and zero-point Energies= -1762.860815  
Sum of electronic and thermal Energies= -1762.810833  
Sum of electronic and thermal Enthalpies= -1762.809556  
Sum of electronic and thermal Free Energies= -1762.964220

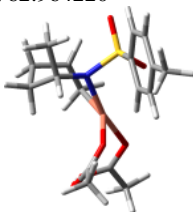

|    |             |             |             |   |             |             |             |
|----|-------------|-------------|-------------|---|-------------|-------------|-------------|
| O  | 2.86671400  | 0.62740900  | -1.58339400 | H | -1.80200800 | -2.02309400 | 3.25751000  |
| C  | 3.95472500  | 0.97333600  | -1.01276900 | H | -2.62265000 | -1.66507300 | 1.73540000  |
| C  | 5.11954000  | 1.33538500  | -1.91882000 | H | -1.59589200 | -3.09432500 | 1.85248300  |
| H  | 5.29249900  | 2.41647400  | -1.86252100 | C | 0.80629500  | -1.69309200 | 2.45519700  |
| H  | 4.92103100  | 1.05628900  | -2.95499300 | H | 1.58249300  | -0.92049500 | 2.38768100  |
| H  | 6.02865000  | 0.84355300  | -1.55971500 | H | 0.63534700  | -1.89280600 | 3.51863800  |
| Cu | 1.47469500  | -0.14944600 | -0.46835100 | H | -0.67139100 | -0.16034100 | 2.05634600  |
| O  | 0.78281300  | 1.70055300  | 0.43625700  | H | -1.83935600 | -2.74945800 | -0.88910000 |
| C  | 1.29225300  | 2.47748800  | 1.25803300  | O | -0.46439900 | -0.99195500 | -2.10370400 |
| C  | 0.47639800  | 3.56100100  | 1.92251900  | C | -2.55976300 | -0.22300300 | -0.64222100 |
| H  | 0.69933800  | 4.51947900  | 1.43927000  | C | -3.87276100 | -0.69441100 | -0.59195900 |
| H  | 0.75159400  | 3.65325900  | 2.97650500  | C | -2.28236300 | 1.14542300  | -0.56534400 |
| H  | -0.58907500 | 3.34984000  | 1.81997200  | C | -4.91821700 | 0.21885500  | -0.45488200 |
| O  | 2.54558600  | 2.46380200  | 1.62171300  | H | -4.06246100 | -1.75979300 | -0.66432100 |
| N  | -0.11445100 | -1.21536000 | 0.33210000  | C | -3.34118000 | 2.03909700  | -0.42313700 |
| S  | -1.23261000 | -1.40774400 | -0.91249300 | H | -1.26009200 | 1.50573000  | -0.59200300 |
| C  | 1.24687200  | -2.69285100 | 0.20660800  | C | -4.67212900 | 1.59531600  | -0.37063600 |
| H  | 0.62166400  | -3.35211000 | -0.38909100 | H | -5.94174800 | -0.14566700 | -0.41677400 |
| C  | 2.35736000  | -2.08320600 | -0.43525000 | H | -3.13086200 | 3.10433600  | -0.35890700 |
| H  | 3.24090800  | -1.84292600 | 0.15367500  | C | -5.80832900 | 2.58289300  | -0.25033000 |
| H  | 2.51310900  | -2.25084800 | -1.49687100 | H | -6.00691800 | 3.07167000  | -1.21315700 |
| C  | -0.48104700 | -1.20206200 | 1.76683400  | H | -6.73417000 | 2.09307600  | 0.06697400  |
| C  | 1.26874900  | -2.95507300 | 1.70233300  | H | -5.57712200 | 3.37461000  | 0.47109400  |
| H  | 0.61107500  | -3.79694700 | 1.94039100  | O | 4.12302700  | 1.03936600  | 0.23553800  |
| H  | 2.28279700  | -3.23286100 | 2.01050700  | H | 3.11851700  | 1.80102800  | 1.06305900  |
| C  | -1.69689500 | -2.05249800 | 2.16678000  |   |             |             |             |

**trans-I-2D**

-----  
# opt=calcf freq=noraman ub3lyp/genecp ginput temperature=403.15  
-----

- Thermochemistry -  
-----

Zero-point correction= 0.406868 (Hartree/Particle)  
Thermal correction to Energy= 0.457216  
Thermal correction to Enthalpy= 0.458493  
Thermal correction to Gibbs Free Energy= 0.301069  
Sum of electronic and zero-point Energies= -1762.872368  
Sum of electronic and thermal Energies= -1762.822019  
Sum of electronic and thermal Enthalpies= -1762.820742  
Sum of electronic and thermal Free Energies= -1762.978166

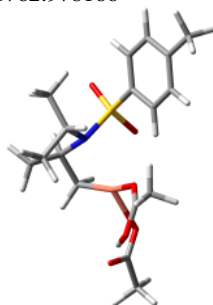

|    |             |             |             |   |             |             |             |
|----|-------------|-------------|-------------|---|-------------|-------------|-------------|
| O  | 3.16514400  | 0.42532100  | -1.48873400 | H | -2.24918600 | -1.96603700 | 3.17497900  |
| C  | 4.22585000  | 0.74161600  | -0.86419200 | H | -2.88425900 | -1.91398600 | 1.52756000  |
| C  | 5.51767800  | 0.79425300  | -1.66257700 | H | -1.74395100 | -3.18146500 | 1.98446200  |
| H  | 5.87538200  | 1.82932900  | -1.70180900 | C | 0.43114900  | -1.51606000 | 2.59457100  |
| H  | 5.37325100  | 0.41830200  | -2.67671200 | H | 1.12134000  | -0.66559100 | 2.56090500  |
| H  | 6.28586300  | 0.20733000  | -1.14882900 | H | 0.18004000  | -1.70351900 | 3.64318500  |
| Cu | 1.60878900  | -0.16889500 | -0.40365700 | H | -1.11952100 | -0.15903600 | 1.85622000  |
| O  | 0.87695500  | 1.62985900  | 0.35331700  | O | -1.99575800 | -2.72923900 | -1.06469900 |
| C  | 1.39971100  | 2.51025200  | 1.06648200  | O | -0.47613700 | -0.98347100 | -2.11636400 |
| C  | 0.57198500  | 3.66544500  | 1.58082600  | C | -2.55323400 | -0.17060100 | -0.67003600 |
| H  | 0.74053500  | 4.53489200  | 0.93426600  | C | -3.89221200 | -0.56368800 | -0.61253300 |
| H  | 0.88532900  | 3.93987000  | 2.59112900  | C | -2.19175400 | 1.17788200  | -0.60265400 |
| H  | -0.48955400 | 3.41263800  | 1.56204100  | C | -4.87864100 | 0.40982500  | -0.46289200 |
| O  | 2.64491400  | 2.54779200  | 1.41593600  | H | -4.14834400 | -1.61450400 | -0.69352800 |
| N  | -0.25179900 | -1.37886000 | 0.37757400  | C | -3.19448900 | 2.13243800  | -0.44484900 |
| S  | -1.31548900 | -1.42806900 | -0.99404900 | H | -1.15052400 | 1.47682900  | -0.64728100 |
| C  | 0.74222000  | -2.57124600 | 0.38565300  | C | -4.54842300 | 1.76940300  | -0.37739100 |
| H  | 0.22097600  | -3.45344300 | -0.00393800 | H | -5.92171000 | 0.10697000  | -0.41722200 |
| C  | 1.92825900  | -2.15246300 | -0.45680700 | H | -2.92004400 | 3.18289900  | -0.38379100 |
| H  | 2.90352600  | -2.40933500 | -0.03986700 | C | -5.62416600 | 2.82108300  | -0.24907200 |
| H  | 1.85715400  | -2.40193500 | -1.51616100 | H | -5.94141500 | 3.17726800  | -1.23809700 |
| C  | -0.81779700 | -1.20529600 | 1.75582400  | H | -6.51226700 | 2.42802500  | 0.25607200  |
| C  | 1.04918300  | -2.74069600 | 1.89559300  | H | -5.26894300 | 3.69228600  | 0.31103200  |
| H  | 0.59822900  | -3.66500800 | 2.27021100  | O | 4.28960900  | 1.01817800  | 0.37025000  |
| H  | 2.12644600  | -2.80906400 | 2.06881800  | H | 3.26520300  | 1.80524500  | 0.95453700  |
| C  | -1.99295900 | -2.12504500 | 2.12105000  |   |             |             |             |



**I-1E**

-----  
# opt=calcf freq=noraman ub3lyp/genecp ginput temperature=403.15  
-----

- Thermochemistry -  
-----

Zero-point correction= 0.343164 (Hartree/Particle)  
Thermal correction to Energy= 0.385667  
Thermal correction to Enthalpy= 0.386944  
Thermal correction to Gibbs Free Energy= 0.247144  
Sum of electronic and zero-point Energies= -1533.845378  
Sum of electronic and thermal Energies= -1533.802875  
Sum of electronic and thermal Enthalpies= -1533.801599  
Sum of electronic and thermal Free Energies= -1533.941399

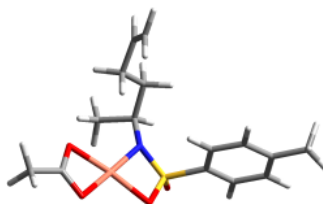

|    |             |             |             |   |             |             |             |
|----|-------------|-------------|-------------|---|-------------|-------------|-------------|
| Cu | 1.61563000  | -1.04282300 | -0.24374000 | C | -2.27201800 | -0.70587100 | 0.16129800  |
| N  | 0.33963700  | -0.04082000 | 0.87579800  | C | -3.48152400 | -1.20402400 | 0.64811100  |
| S  | -0.74370800 | -1.23009000 | 0.93589800  | C | -2.24309300 | 0.16261100  | -0.93389500 |
| C  | 1.01934300  | 4.24662400  | -0.05300800 | C | -4.67057600 | -0.82846500 | 0.02415700  |
| H  | 0.95463400  | 5.03108300  | 0.70412900  | H | -3.48316300 | -1.87101300 | 1.50317200  |
| C  | 0.81484900  | 4.56732800  | -1.33158200 | C | -3.44048800 | 0.52770000  | -1.54229800 |
| H  | 0.86998200  | 3.82142100  | -2.12270200 | H | -1.29758300 | 0.55564400  | -1.29253300 |
| H  | 0.59234300  | 5.58559300  | -1.63991500 | C | -4.67154000 | 0.04022700  | -1.07534300 |
| C  | 0.47097900  | 0.93200100  | 1.98465700  | H | -5.61364300 | -1.21745600 | 0.39987300  |
| C  | 1.32706300  | 2.86535600  | 0.45950700  | H | -3.42049700 | 1.20417100  | -2.39318800 |
| H  | 2.31268400  | 2.87313800  | 0.94604400  | C | -5.96533600 | 0.46681800  | -1.72674500 |
| H  | 1.40138100  | 2.16531000  | -0.38072300 | H | -6.76474400 | -0.25758600 | -1.54187600 |
| C  | 0.26841700  | 2.36943200  | 1.46305700  | H | -6.30258500 | 1.43533300  | -1.33406100 |
| H  | 0.24417000  | 3.04548200  | 2.33016100  | H | -5.85028200 | 0.57922700  | -2.81012700 |
| O  | -0.06016700 | -2.18691200 | -0.04879600 | C | 3.72382400  | -1.00445500 | -1.28317800 |
| O  | -1.09770700 | -1.76064200 | 2.25817100  | C | 5.08296200  | -1.01376000 | -1.92129000 |
| H  | -0.33424000 | 0.73280900  | 2.70447300  | H | 5.75874400  | -1.61968100 | -1.30598500 |
| C  | 1.80256900  | 0.72292400  | 2.71823200  | H | 5.03016400  | -1.46860300 | -2.91329500 |
| H  | 1.92879600  | 1.46817800  | 3.51291800  | H | 5.48407000  | 0.00014200  | -1.98066300 |
| H  | 1.82519500  | -0.27188400 | 3.17532800  | O | 3.37415500  | -0.07148000 | -0.48374000 |
| H  | 2.65179500  | 0.80414800  | 2.03200900  | O | 2.88504500  | -1.94098700 | -1.49736900 |
| H  | -0.72183600 | 2.42708400  | 0.99424400  |   |             |             |             |

*cis*-TS-E<sub>bt</sub>

-----  
# opt=(calcfc,ts,noeigen) freq=noraman ub3lyp/genecp gfinput temperature=403.15  
-----

-----  
- Thermochemistry -  
-----

Zero-point correction= 0.343147 (Hartree/Particle)  
Thermal correction to Energy= 0.383889  
Thermal correction to Enthalpy= 0.385166  
Thermal correction to Gibbs Free Energy= 0.254952  
Sum of electronic and zero-point Energies= -1533.829654  
Sum of electronic and thermal Energies= -1533.788911  
Sum of electronic and thermal Enthalpies= -1533.787635  
Sum of electronic and thermal Free Energies= -1533.917848

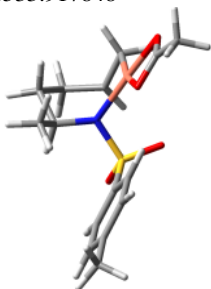

|    |             |             |             |   |             |             |             |
|----|-------------|-------------|-------------|---|-------------|-------------|-------------|
| O  | -2.87334000 | 2.29237400  | -0.23125900 | O | -0.14892600 | -0.30258600 | -2.16910000 |
| C  | -1.85382900 | 2.99209400  | 0.10326700  | H | 0.35436400  | -2.55563800 | 1.19819200  |
| C  | -1.96179100 | 4.49726000  | 0.10181000  | C | 0.23193500  | -0.81948700 | 2.48723500  |
| H  | -2.92673600 | 4.80759500  | 0.51182500  | H | 0.37611600  | -1.37350000 | 3.42273200  |
| H  | -1.14329700 | 4.94177900  | 0.67147400  | H | 1.19721400  | -0.40928800 | 2.18003200  |
| H  | -1.91028700 | 4.85683600  | -0.93265700 | H | -0.44462000 | 0.01994400  | 2.68378700  |
| Cu | -1.84635600 | 0.58975200  | -0.06203900 | C | 1.98617400  | -0.41164900 | -0.57462400 |
| N  | -0.65028400 | -1.03802700 | 0.14606300  | C | 2.05302100  | 0.96675700  | -0.34139500 |
| S  | 0.45073000  | -1.15559500 | -1.12675800 | C | 3.10628600  | -1.22796800 | -0.41183900 |
| C  | -2.36620900 | -1.93475500 | -0.49424000 | C | 3.26464400  | 1.51719800  | 0.06683000  |
| H  | -2.00200100 | -2.23320700 | -1.47335900 | H | 1.17500100  | 1.59445800  | -0.45223800 |
| C  | -3.30407900 | -0.86866100 | -0.46556400 | C | 4.31099900  | -0.65283600 | -0.00631600 |
| H  | -3.98764200 | -0.78470100 | 0.37862600  | H | 3.03025500  | -2.29080200 | -0.61327200 |
| H  | -3.67009200 | -0.47229000 | -1.41039700 | C | 4.41059000  | 0.72280600  | 0.23752300  |
| C  | -0.35323100 | -1.74322400 | 1.41412000  | H | 3.32130400  | 2.58642300  | 0.25634200  |
| C  | -2.31073100 | -2.99138900 | 0.58841400  | H | 5.18733300  | -1.28412700 | 0.11802200  |
| H  | -1.70247200 | -3.83396100 | 0.24252000  | C | 5.72002900  | 1.34714500  | 0.65737600  |
| H  | -3.32328700 | -3.36276000 | 0.78781900  | H | 6.15258300  | 1.94001500  | -0.15893100 |
| C  | -1.68235200 | -2.38578600 | 1.84872500  | H | 5.58515500  | 2.02363700  | 1.50917800  |
| H  | -2.34496300 | -1.62026800 | 2.27475200  | H | 6.45520400  | 0.58744200  | 0.94017500  |
| H  | -1.51471000 | -3.13835300 | 2.62716500  | O | -0.77083300 | 2.41000500  | 0.40565500  |
| O  | 0.73203400  | -2.57371500 | -1.40840800 |   |             |             |             |

*cis-I-2E*

-----  
# opt=calcf freq=noraman ub3lyp/genecp ginput temperature=403.15  
-----

-----  
- Thermochemistry -  
-----

Zero-point correction= 0.344891 (Hartree/Particle)  
Thermal correction to Energy= 0.385865  
Thermal correction to Enthalpy= 0.387142  
Thermal correction to Gibbs Free Energy= 0.256549  
Sum of electronic and zero-point Energies= -1533.840158  
Sum of electronic and thermal Energies= -1533.799183  
Sum of electronic and thermal Enthalpies= -1533.797907  
Sum of electronic and thermal Free Energies= -1533.928500

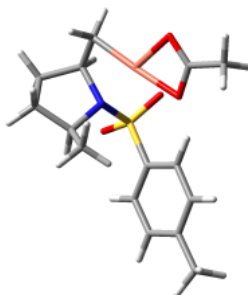

|    |             |             |             |   |             |             |             |
|----|-------------|-------------|-------------|---|-------------|-------------|-------------|
| O  | -3.05096200 | 2.35970100  | -0.12154300 | O | -0.12707600 | -0.43002300 | -2.29359800 |
| C  | -1.96810700 | 3.00399900  | 0.03336500  | H | 0.71735300  | -2.32580900 | 1.19933200  |
| C  | -1.96342400 | 4.51388900  | -0.00683000 | C | 0.12903800  | -0.63086200 | 2.40141500  |
| H  | -2.98044400 | 4.90789800  | 0.03154800  | H | 0.45470000  | -1.07763400 | 3.34838800  |
| H  | -1.37227300 | 4.90661500  | 0.82596300  | H | 0.92009500  | 0.03418000  | 2.04662000  |
| H  | -1.48451100 | 4.84500600  | -0.93559100 | H | -0.76162300 | -0.02383900 | 2.60098400  |
| Cu | -1.94847400 | 0.59797800  | -0.00145100 | C | 1.92763600  | -0.37293300 | -0.59038500 |
| N  | -0.67967000 | -1.18593700 | 0.07231100  | C | 1.90395000  | 1.01635800  | -0.42887300 |
| S  | 0.49517400  | -1.22720400 | -1.23134400 | C | 3.07977900  | -1.11810000 | -0.32818200 |
| C  | -1.95315000 | -1.99715800 | -0.35603000 | C | 3.05716800  | 1.65124900  | 0.02583200  |
| H  | -1.84463200 | -2.25694600 | -1.41050800 | H | 1.00333700  | 1.58950100  | -0.62222700 |
| C  | -3.10021600 | -1.03052400 | -0.15671900 | C | 4.22274800  | -0.45762600 | 0.11968400  |
| H  | -3.65248000 | -1.15636300 | 0.77975600  | H | 3.07680400  | -2.19098600 | -0.48615700 |
| H  | -3.77690800 | -0.93311800 | -1.00737400 | C | 4.23066800  | 0.93189000  | 0.30332200  |
| C  | -0.18597600 | -1.73599900 | 1.39675900  | H | 3.04363500  | 2.72915900  | 0.16598400  |
| C  | -1.89809900 | -3.23242700 | 0.55059800  | H | 5.12294000  | -1.03115100 | 0.32530500  |
| H  | -1.23487900 | -3.98657100 | 0.11125600  | C | 5.47809200  | 1.64676300  | 0.76425400  |
| H  | -2.88943500 | -3.67661400 | 0.68120400  | H | 5.99232600  | 2.12034200  | -0.08232300 |
| C  | -1.30100000 | -2.69510500 | 1.85338000  | H | 5.24181600  | 2.43934600  | 1.48253600  |
| H  | -2.05569400 | -2.14179700 | 2.42571500  | H | 6.18593100  | 0.95781200  | 1.23540300  |
| H  | -0.90269800 | -3.47921400 | 2.50521300  | O | -0.87369300 | 2.37004300  | 0.20700600  |
| O  | 0.87456200  | -2.62657700 | -1.47600900 |   |             |             |             |

**I-3E**

-----  
# opt=calcf freq=noraman ub3lyp/genecp ginput temperature=403.15  
-----

- Thermochemistry -  
-----

Zero-point correction= 0.344974 (Hartree/Particle)  
Thermal correction to Energy= 0.386131  
Thermal correction to Enthalpy= 0.387407  
Thermal correction to Gibbs Free Energy= 0.251472  
Sum of electronic and zero-point Energies= -1533.823756  
Sum of electronic and thermal Energies= -1533.782600  
Sum of electronic and thermal Enthalpies= -1533.781323  
Sum of electronic and thermal Free Energies= -1533.917258

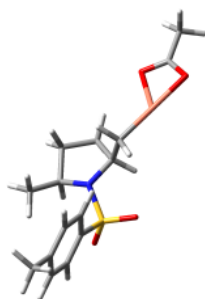

|    |             |             |             |   |             |             |             |
|----|-------------|-------------|-------------|---|-------------|-------------|-------------|
| O  | -4.61042600 | 0.11348400  | -0.75562700 | O | 0.96060800  | -0.18830400 | 2.18024700  |
| C  | -5.45209000 | -0.64197400 | -0.16537300 | H | 0.95799500  | 3.12699300  | -0.12953100 |
| C  | -6.93156800 | -0.42469800 | -0.35056400 | C | 1.92975400  | 2.17175100  | -1.79829800 |
| H  | -7.12869400 | 0.53918700  | -0.82259000 | H | 1.95349600  | 3.06673800  | -2.43128200 |
| H  | -7.33173800 | -1.22487200 | -0.98361800 | H | 2.89687400  | 2.09655600  | -1.29336700 |
| H  | -7.43576100 | -0.48733600 | 0.61791700  | H | 1.80641900  | 1.29330300  | -2.44105200 |
| Cu | -3.13548300 | -1.05969600 | 0.14698200  | C | 2.99752000  | -0.14625100 | 0.48834600  |
| N  | 0.57123400  | 1.04425200  | 0.00686300  | C | 2.74083400  | -1.29454800 | -0.26666100 |
| S  | 1.64691300  | 0.74106100  | 1.27176000  | C | 4.30422100  | 0.28300500  | 0.71256500  |
| C  | -0.89564300 | 0.79836400  | 0.28879700  | C | 3.80755300  | -2.00438500 | -0.80749500 |
| H  | -1.05744800 | 0.80799200  | 1.36848100  | H | 1.71901000  | -1.61725200 | -0.43708000 |
| C  | -1.30049500 | -0.55922700 | -0.26724700 | C | 5.36353100  | -0.44299600 | 0.16381000  |
| H  | -0.74092000 | -1.37358800 | 0.21512500  | H | 4.48103600  | 1.17452300  | 1.30443600  |
| H  | -1.19612600 | -0.61890500 | -1.35657600 | C | 5.13528000  | -1.59204000 | -0.60173600 |
| C  | 0.77365300  | 2.28131600  | -0.80640200 | H | 3.61003800  | -2.89466500 | -1.40019400 |
| C  | -1.58516200 | 2.00458400  | -0.38628700 | H | 6.38342200  | -0.10801400 | 0.33528400  |
| H  | -1.71711600 | 2.80784700  | 0.34858700  | C | 6.28045300  | -2.37595200 | -1.19797900 |
| H  | -2.57205700 | 1.74331700  | -0.77697300 | H | 6.28482500  | -3.41090300 | -0.83438200 |
| C  | -0.59894400 | 2.45130700  | -1.47014300 | H | 6.20555300  | -2.42010900 | -2.29159600 |
| H  | -0.66734300 | 1.80070900  | -2.35144100 | H | 7.24663600  | -1.92846600 | -0.94621300 |
| H  | -0.75929600 | 3.48163900  | -1.80342800 | O | -5.02670100 | -1.59385100 | 0.56805800  |
| O  | 2.20496600  | 2.00119700  | 1.78717600  |   |             |             |             |

*cis*-TS-E<sub>ch</sub>

-----  
# opt=(calcfc,ts,noeigen) freq=noraman ub3lyp/genecp ginput temperature=403.15  
-----

-----  
- Thermochemistry -  
-----

Zero-point correction= 0.343301 (Hartree/Particle)  
Thermal correction to Energy= 0.383902  
Thermal correction to Enthalpy= 0.385179  
Thermal correction to Gibbs Free Energy= 0.255946  
Sum of electronic and zero-point Energies= -1533.830087  
Sum of electronic and thermal Energies= -1533.789486  
Sum of electronic and thermal Enthalpies= -1533.788210  
Sum of electronic and thermal Free Energies= -1533.917442

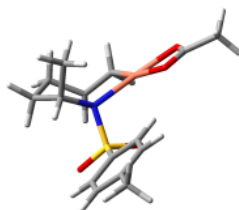

|    |             |             |             |   |             |             |             |
|----|-------------|-------------|-------------|---|-------------|-------------|-------------|
| Cu | -1.83685600 | 0.59616400  | -0.09757800 | H | 0.84805900  | -1.91373200 | 1.41830900  |
| O  | -2.87402500 | 2.29363100  | -0.30036400 | C | -0.60983600 | -0.92328200 | 2.63667400  |
| C  | -1.89104300 | 2.99208100  | 0.12940500  | H | -0.31548100 | -1.44801900 | 3.55306500  |
| C  | -2.00983600 | 4.49624100  | 0.15526900  | H | -0.10345000 | 0.04634900  | 2.61076100  |
| H  | -1.80623900 | 4.88535000  | -0.84953600 | H | -1.68902300 | -0.73702600 | 2.68796200  |
| H  | -3.02581900 | 4.79316900  | 0.42788500  | H | -0.41509000 | -3.76016700 | 0.62406500  |
| H  | -1.28480500 | 4.92605700  | 0.84960800  | C | 1.99839500  | -0.35059900 | -0.54901000 |
| N  | -0.60088200 | -1.01459800 | 0.17021200  | C | 2.03370300  | 1.00432600  | -0.20053000 |
| S  | 0.46953200  | -1.08946500 | -1.12995600 | C | 3.14528200  | -1.14368000 | -0.48730300 |
| C  | -2.30150200 | -1.93777400 | -0.40996000 | C | 3.24179700  | 1.55416400  | 0.21955400  |
| H  | -1.86499200 | -2.38810200 | -1.29853200 | H | 1.13779900  | 1.61587600  | -0.23800400 |
| C  | -3.23739500 | -0.88512100 | -0.60101300 | C | 4.34512300  | -0.56916800 | -0.06703400 |
| H  | -4.00924400 | -0.73036200 | 0.15207100  | H | 3.09169100  | -2.18801300 | -0.77478700 |
| H  | -3.49386500 | -0.58379400 | -1.61415400 | C | 4.41385400  | 0.78361200  | 0.28943100  |
| C  | -0.23725800 | -1.75306500 | 1.40399600  | H | 3.27472500  | 2.60484600  | 0.49775400  |
| C  | -2.36666900 | -2.84655300 | 0.79559700  | H | 5.24151500  | -1.18252200 | -0.01942200 |
| H  | -2.85279700 | -3.78219000 | 0.48889700  | C | 5.71935800  | 1.40992700  | 0.71852900  |
| H  | -3.00096400 | -2.39396800 | 1.56672000  | H | 6.46235700  | 0.65061100  | 0.98160400  |
| C  | -0.95459000 | -3.11761100 | 1.32772400  | H | 6.14415700  | 2.02256000  | -0.08745200 |
| H  | -0.97532400 | -3.62257900 | 2.30037000  | H | 5.58236300  | 2.06738500  | 1.58437800  |
| O  | 0.76802900  | -2.48910400 | -1.48150400 | O | -0.82778900 | 2.41111000  | 0.49988800  |
| O  | -0.15613900 | -0.20536900 | -2.13201400 |   |             |             |             |

*trans*-TS-E<sub>ch</sub>

# opt=(calcfc,ts,noeigen) freq=noraman ub3lyp/genecp ginput temperature=403.15

- Thermochemistry -

Zero-point correction= 0.343602 (Hartree/Particle)  
Thermal correction to Energy= 0.384108  
Thermal correction to Enthalpy= 0.385385  
Thermal correction to Gibbs Free Energy= 0.255648  
Sum of electronic and zero-point Energies= -1533.824574  
Sum of electronic and thermal Energies= -1533.784067  
Sum of electronic and thermal Enthalpies= -1533.782790  
Sum of electronic and thermal Free Energies= -1533.912527

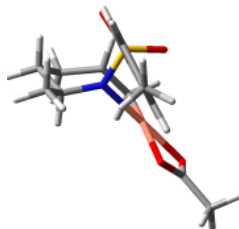

|    |             |             |             |   |             |             |             |
|----|-------------|-------------|-------------|---|-------------|-------------|-------------|
| Cu | 1.86526000  | 0.69658400  | -0.05576200 | C | -1.92667100 | -0.36230100 | -0.50368100 |
| N  | 0.73317300  | -0.99750400 | 0.24505400  | C | -3.10843500 | -1.09987900 | -0.59420100 |
| S  | -0.39614800 | -1.15671600 | -1.01056500 | C | -1.94027500 | 0.98113000  | -0.11661600 |
| C  | 2.39832700  | -1.80846300 | -0.47333300 | C | -4.31872900 | -0.48427800 | -0.27756100 |
| H  | 1.94415400  | -2.24435900 | -1.35956400 | H | -3.07295600 | -2.13559500 | -0.91353800 |
| C  | 3.27666100  | -0.70082200 | -0.67885500 | C | -3.16046800 | 1.57140900  | 0.20530300  |
| H  | 4.09809600  | -0.55652700 | 0.02214000  | H | -1.02456100 | 1.55952700  | -0.04826700 |
| H  | 3.45918300  | -0.36290400 | -1.69674900 | C | -4.36500300 | 0.85462600  | 0.13248100  |
| C  | 0.58645100  | -1.74055400 | 1.53290800  | H | -5.24138000 | -1.05447800 | -0.35291000 |
| C  | 2.61440200  | -2.78073200 | 0.66546800  | H | -3.17515500 | 2.61367800  | 0.51471600  |
| H  | 3.08766400  | -3.68377800 | 0.25899700  | C | -5.67403000 | 1.50834700  | 0.50641400  |
| H  | 3.31086800  | -2.34671600 | 1.39403500  | H | -6.52673000 | 0.97577900  | 0.07355000  |
| C  | -0.82571600 | -1.84840500 | 2.11283800  | H | -5.81155400 | 1.51924000  | 1.59588000  |
| H  | -0.75922900 | -2.32701800 | 3.09670400  | H | -5.71294800 | 2.54878500  | 0.16601700  |
| H  | -1.28566700 | -0.86533800 | 2.24244500  | C | 1.83050700  | 3.08432700  | 0.26127700  |
| H  | -1.47717400 | -2.46255000 | 1.48513900  | O | 2.80611300  | 2.45714000  | -0.27669600 |
| C  | 1.27507000  | -3.09915500 | 1.33552200  | O | 0.82753400  | 2.43409800  | 0.68539700  |
| H  | 1.41145600  | -3.62152100 | 2.28975000  | C | 1.87994700  | 4.58992300  | 0.35446400  |
| H  | 1.18562500  | -1.15480200 | 2.24283900  | H | 1.61267200  | 5.01550700  | -0.62011600 |
| O  | -0.70130600 | -2.57744600 | -1.25730000 | H | 1.17101000  | 4.95171000  | 1.10198400  |
| O  | 0.20720700  | -0.34673100 | -2.08599800 | H | 2.89343300  | 4.92200600  | 0.59443900  |
| H  | 0.65821200  | -3.72910700 | 0.68548100  |   |             |             |             |

*trans*-TS-E<sub>bt</sub>

-----  
# opt=(calcfc,ts,noeigen) freq=noraman ub3lyp/genecp gfinput temperature=403.15  
-----

- Thermochemistry -  
-----

Zero-point correction= 0.343591 (Hartree/Particle)  
Thermal correction to Energy= 0.384078  
Thermal correction to Enthalpy= 0.385354  
Thermal correction to Gibbs Free Energy= 0.256644  
Sum of electronic and zero-point Energies= -1533.823024  
Sum of electronic and thermal Energies= -1533.782537  
Sum of electronic and thermal Enthalpies= -1533.781260  
Sum of electronic and thermal Free Energies= -1533.909971

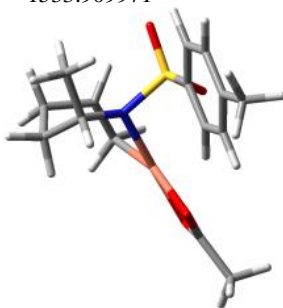

|    |             |             |             |   |             |             |             |
|----|-------------|-------------|-------------|---|-------------|-------------|-------------|
| Cu | 1.86197700  | 0.57666800  | -0.11438700 | H | -0.35431500 | -3.62318600 | 0.77670600  |
| O  | 0.93657600  | 2.35412400  | 0.67998000  | C | 1.68507400  | -2.05934000 | 2.00883100  |
| C  | 1.96573000  | 2.95360500  | 0.24440400  | H | 2.25805000  | -1.16629600 | 2.28950700  |
| C  | 2.09160400  | 4.45450100  | 0.33805300  | H | 1.59350400  | -2.68379700 | 2.90399800  |
| H  | 1.80057800  | 4.89499800  | -0.62305600 | H | -0.11688200 | -0.86227100 | 2.12380800  |
| H  | 3.12897200  | 4.73792000  | 0.53366500  | O | -0.78274900 | -2.33419900 | -1.62306800 |
| H  | 1.43312600  | 4.84691700  | 1.11582200  | O | 0.20523900  | -0.03212100 | -2.04739700 |
| O  | 2.90103600  | 2.27898700  | -0.30861500 | C | -1.97984800 | -0.24786400 | -0.52564900 |
| N  | 0.61705600  | -1.03751500 | 0.16308800  | C | -3.16910500 | -0.96887200 | -0.65406500 |
| S  | -0.45849500 | -0.98543500 | -1.13123500 | C | -1.96996300 | 1.04322400  | 0.01238300  |
| C  | 2.32353900  | -1.97468300 | -0.40503200 | C | -4.36332300 | -0.38925600 | -0.22779000 |
| H  | 1.88255000  | -2.46253800 | -1.26983200 | H | -3.14977700 | -1.96372000 | -1.08581700 |
| C  | 3.23487900  | -0.91033400 | -0.64164900 | C | -3.17493700 | 1.59809700  | 0.43840000  |
| H  | 4.03113800  | -0.73341300 | 0.08047700  | H | -1.04575200 | 1.60532600  | 0.10743600  |
| H  | 3.45524100  | -0.62720000 | -1.66831600 | C | -4.38652500 | 0.89914100  | 0.32336900  |
| C  | 0.30006600  | -1.64497900 | 1.47632900  | H | -5.29120700 | -0.94725300 | -0.32692700 |
| C  | 2.40718700  | -2.79851300 | 0.86642500  | H | -3.17253800 | 2.59798400  | 0.86566500  |
| H  | 1.94747700  | -3.77848000 | 0.70529700  | C | -5.68637500 | 1.53338000  | 0.75781800  |
| H  | 3.45912600  | -2.96634800 | 1.12373600  | H | -6.44510400 | 0.77838800  | 0.98739700  |
| C  | -0.67808700 | -2.82993600 | 1.45500300  | H | -5.54941600 | 2.16113300  | 1.64480500  |
| H  | -0.75331100 | -3.24065300 | 2.46847500  | H | -6.09269100 | 2.17597600  | -0.03454700 |
| H  | -1.67989400 | -2.52067200 | 1.14889500  |   |             |             |             |

**trans-I-2E**

-----  
# opt=calcfc freq=noraman ub3lyp/genecp ginput temperature=403.15  
-----

-----  
- Thermochemistry -  
-----

Zero-point correction= 0.345310 (Hartree/Particle)  
Thermal correction to Energy= 0.386144  
Thermal correction to Enthalpy= 0.387420  
Thermal correction to Gibbs Free Energy= 0.257223  
Sum of electronic and zero-point Energies= -1533.833538  
Sum of electronic and thermal Energies= -1533.792703  
Sum of electronic and thermal Enthalpies= -1533.791427  
Sum of electronic and thermal Free Energies= -1533.921624

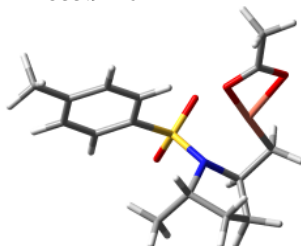

|    |             |             |             |   |             |             |             |
|----|-------------|-------------|-------------|---|-------------|-------------|-------------|
| Cu | 1.97253900  | 0.51148900  | -0.15121300 | H | -0.51899300 | -3.65739300 | 1.07100400  |
| O  | 1.12535500  | 2.25916800  | 0.58272600  | C | 1.42434400  | -1.93466600 | 2.18328500  |
| C  | 2.17340600  | 2.88426100  | 0.20031700  | H | 1.97343300  | -1.01426700 | 2.41537600  |
| C  | 2.25478400  | 4.38245300  | 0.37567200  | H | 1.26780300  | -2.47712700 | 3.12064900  |
| H  | 1.52990300  | 4.86181400  | -0.29216300 | H | -0.36405600 | -0.69577200 | 1.92907700  |
| H  | 3.25612300  | 4.74850000  | 0.14284600  | O | -0.98617000 | -2.44435500 | -1.60087800 |
| H  | 1.98265900  | 4.65072900  | 1.40120500  | O | 0.17682200  | -0.26124500 | -2.17987000 |
| O  | 3.12879100  | 2.24488000  | -0.33422600 | C | -1.92880400 | -0.20452900 | -0.54179100 |
| N  | 0.59000200  | -1.22192900 | 0.12532200  | C | -3.17995700 | -0.82598800 | -0.57564800 |
| S  | -0.52985600 | -1.10514500 | -1.20572800 | C | -1.78378700 | 1.11465200  | -0.10034700 |
| C  | 1.83012500  | -2.10844000 | -0.23303400 | C | -4.29892400 | -0.11847600 | -0.14089400 |
| H  | 1.50877400  | -2.86196600 | -0.95935700 | H | -3.26681900 | -1.84262300 | -0.94327200 |
| C  | 2.87911800  | -1.15202800 | -0.76537400 | C | -2.91688400 | 1.79615700  | 0.33974300  |
| H  | 3.87476700  | -1.27340700 | -0.33417700 | H | -0.81529100 | 1.60538600  | -0.07947800 |
| H  | 2.91583800  | -1.07488000 | -1.85369800 | C | -4.18679000 | 1.19949200  | 0.32358400  |
| C  | 0.09286800  | -1.59049300 | 1.49712900  | H | -5.27406700 | -0.59829100 | -0.16548900 |
| C  | 2.17618800  | -2.75978100 | 1.12570800  | H | -2.80902200 | 2.81668600  | 0.69838400  |
| H  | 1.83977100  | -3.80126700 | 1.14553200  | C | -5.40645900 | 1.97053000  | 0.76801500  |
| H  | 3.25665400  | -2.76209800 | 1.29235800  | H | -6.20271400 | 1.30166300  | 1.10985900  |
| C  | -0.90221000 | -2.75910200 | 1.56281400  | H | -5.16755900 | 2.66340700  | 1.58158000  |
| H  | -1.08984800 | -2.99512400 | 2.61665700  | H | -5.81282200 | 2.56795700  | -0.05883600 |
| H  | -1.86096900 | -2.51113600 | 1.10444100  |   |             |             |             |



### HOAc (130 °C)

-----  
# opt=calcfreq=noraman ub3lyp/genecp ginput temperature=403.15  
-----

-----  
- Thermochemistry -  
-----

Zero-point correction= 0.062023 (Hartree/Particle)  
Thermal correction to Energy= 0.069290  
Thermal correction to Enthalpy= 0.070567  
Thermal correction to Gibbs Free Energy= 0.022655  
Sum of electronic and zero-point Energies= -229.015587  
Sum of electronic and thermal Energies= -229.008320  
Sum of electronic and thermal Enthalpies= -229.007043  
Sum of electronic and thermal Free Energies= -229.054955

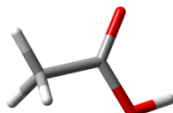

|   |             |             |             |   |             |             |             |
|---|-------------|-------------|-------------|---|-------------|-------------|-------------|
| O | 0.64568600  | 1.20201900  | 0.00001800  | H | -1.68533200 | -0.69151400 | 0.88206300  |
| C | 0.09249300  | 0.12562300  | 0.00000000  | H | -1.91752600 | 0.84835200  | -0.00005300 |
| C | -1.39757600 | -0.10985600 | -0.00000700 | O | 0.77867400  | -1.04660600 | -0.00001100 |
| H | -1.68531600 | -0.69159700 | -0.88202700 | H | 1.72379200  | -0.80314500 | 0.00000100  |

### TEMPO (130 °C)

# opt=calcfreq=noraman ub3lyp/genecp gfinput temperature=403.15

- Thermochemistry -

Zero-point correction= 0.263368 (Hartree/Particle)  
Thermal correction to Energy= 0.284757  
Thermal correction to Enthalpy= 0.286034  
Thermal correction to Gibbs Free Energy= 0.207637  
Sum of electronic and zero-point Energies= -483.447721  
Sum of electronic and thermal Energies= -483.426332  
Sum of electronic and thermal Enthalpies= -483.425055  
Sum of electronic and thermal Free Energies= -483.503452

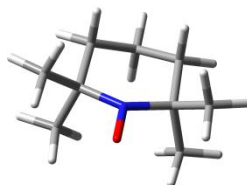

|   |             |             |             |   |             |             |             |
|---|-------------|-------------|-------------|---|-------------|-------------|-------------|
| C | -1.36073200 | 0.59053900  | 1.24717300  | H | 1.90768000  | 0.45011200  | 2.42312300  |
| C | -2.12489100 | 0.14140800  | 0.00000000  | H | 0.95425100  | 1.89090400  | 2.02861000  |
| C | -1.36073200 | 0.59053900  | -1.24717300 | C | 0.07136400  | -1.45949300 | 1.76108300  |
| C | 0.07136400  | 0.02351800  | -1.33128700 | H | 1.08577200  | -1.86108200 | 1.68435000  |
| C | 0.07136400  | 0.02351800  | 1.33128700  | H | -0.26294000 | -1.54944700 | 2.80100900  |
| H | -1.89525300 | 0.30475800  | -2.16158500 | H | -0.59053900 | -2.07239600 | 1.14150200  |
| H | -2.26645900 | -0.94678100 | 0.00000000  | C | 0.89265000  | 0.84283900  | -2.34092500 |
| H | -3.12932500 | 0.58209900  | 0.00000000  | H | 1.90768000  | 0.45011200  | -2.42312300 |
| H | -1.30610900 | 1.68793600  | 1.24566600  | H | 0.41189800  | 0.80269100  | -3.32483900 |
| H | -1.89525300 | 0.30475800  | 2.16158500  | H | 0.95425100  | 1.89090400  | -2.02861000 |
| H | -1.30610900 | 1.68793600  | -1.24566600 | C | 0.07136400  | -1.45949300 | -1.76108300 |
| N | 0.75681200  | 0.14853100  | 0.00000000  | H | -0.26294000 | -1.54944700 | -2.80100900 |
| O | 2.01777100  | -0.09991000 | 0.00000000  | H | 1.08577200  | -1.86108200 | -1.68435000 |
| C | 0.89265000  | 0.84283900  | 2.34092500  | H | -0.59053900 | -2.07239600 | -1.14150200 |
| H | 0.41189800  | 0.80269100  | 3.32483900  |   |             |             |             |

### OAc Cu(I) (130 °C)

# opt=calcfreq=noraman ub3lyp/genecp gfinput temperature=403.15

- Thermochemistry -

Zero-point correction= 0.050872 (Hartree/Particle)  
Thermal correction to Energy= 0.060216  
Thermal correction to Enthalpy= 0.061493  
Thermal correction to Gibbs Free Energy= 0.005074  
Sum of electronic and zero-point Energies= -424.589041  
Sum of electronic and thermal Energies= -424.579697  
Sum of electronic and thermal Enthalpies= -424.578420  
Sum of electronic and thermal Free Energies= -424.634839

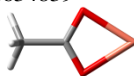

|    |             |             |             |   |             |             |             |
|----|-------------|-------------|-------------|---|-------------|-------------|-------------|
| Cu | 1.30468500  | -0.00022200 | 0.00386000  | C | -2.57908800 | 0.00007000  | 0.00562900  |
| O  | -0.44595500 | -1.11332600 | -0.00924300 | H | -2.91731400 | -0.03064800 | 1.04813600  |
| C  | -1.06303400 | 0.00065500  | -0.01502800 | H | -2.96825700 | 0.91092700  | -0.45354500 |
| O  | -0.44542600 | 1.11423000  | -0.00919800 | H | -2.96650700 | -0.88542900 | -0.50260400 |

**(OAc)(HOAc) Cu(I) (130 °C)**

# opt=calcfc freq=noraman ub3lyp/genecp gfinput temperature=403.15

- Thermochemistry -

Zero-point correction= 0.114591 (Hartree/Particle)  
Thermal correction to Energy= 0.132718  
Thermal correction to Enthalpy= 0.133995  
Thermal correction to Gibbs Free Energy= 0.052646  
Sum of electronic and zero-point Energies= -653.670140  
Sum of electronic and thermal Energies= -653.652013  
Sum of electronic and thermal Enthalpies= -653.650736  
Sum of electronic and thermal Free Energies= -653.732085

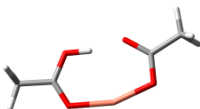

|    |             |             |             |   |             |            |             |
|----|-------------|-------------|-------------|---|-------------|------------|-------------|
| Cu | 0.08972900  | -1.12074700 | -0.00002600 | H | -3.90896700 | 1.30774700 | 0.88834200  |
| O  | 1.18365400  | 1.35017800  | -0.00018100 | H | -3.90724600 | 1.32685400 | -0.87436200 |
| C  | 2.10615200  | 0.49736400  | -0.00003200 | C | 3.54900300  | 0.96471700 | 0.00032800  |
| O  | 1.93623900  | -0.77988300 | 0.00011000  | H | 4.06149800  | 0.56821300 | 0.88320500  |
| C  | -2.18763600 | 0.41038900  | -0.00045400 | H | 4.06407900  | 0.56245100 | -0.87838800 |
| O  | -1.78870500 | -0.77527000 | -0.00028300 | H | 3.60396200  | 2.05419800 | -0.00294700 |
| C  | -3.65998600 | 0.71706300  | 0.00063900  | O | -1.42112900 | 1.46328400 | -0.00069200 |
| H  | -4.23816300 | -0.20683800 | -0.00919600 | H | -0.40296400 | 1.28535100 | -0.00040600 |

I-1C

-----  
 # opt=calcf freq=noraman ub3lyp/genecp ginput temperature=373.15  
 -----

- Thermochemistry -  
 -----

Zero-point correction= 0.392311 (Hartree/Particle)  
 Thermal correction to Energy= 0.440361  
 Thermal correction to Enthalpy= 0.441543  
 Thermal correction to Gibbs Free Energy= 0.291463  
 Sum of electronic and zero-point Energies= -1883.048387  
 Sum of electronic and thermal Energies= -1883.000337  
 Sum of electronic and thermal Enthalpies= -1882.999155  
 Sum of electronic and thermal Free Energies= -1883.149235

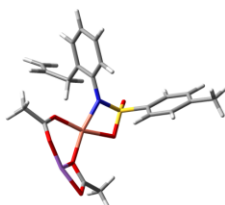

|    |             |             |             |    |             |             |             |
|----|-------------|-------------|-------------|----|-------------|-------------|-------------|
| Cu | -1.09120100 | -1.08137600 | -0.20997600 | H  | 3.61930700  | 1.36401300  | -1.81965700 |
| O  | -1.42622500 | -4.96034000 | -0.03817200 | C  | 5.25367600  | -0.27510800 | 0.70183600  |
| C  | -1.27138600 | -4.02175700 | -0.84636700 | H  | 4.29182200  | -1.62425500 | 2.08681000  |
| C  | -0.52653000 | -4.18886300 | -2.14526800 | H  | 5.88513800  | 1.11341600  | -0.81880800 |
| H  | 0.27652500  | -3.44844300 | -2.20760700 | C  | 6.62709100  | -0.44876900 | 1.30493700  |
| H  | -1.21018300 | -3.98899300 | -2.97812600 | H  | 7.33961100  | 0.27293100  | 0.89444600  |
| H  | -0.12679600 | -5.20045000 | -2.22937300 | H  | 6.60382000  | -0.32125700 | 2.39346600  |
| O  | -1.81223500 | -2.85973800 | -0.57291500 | H  | 7.01980600  | -1.45431500 | 1.10681300  |
| N  | 0.00028500  | 0.56759600  | -0.01394800 | C  | -0.20482100 | 1.87662300  | 0.50651000  |
| S  | 1.07849100  | 0.20279000  | -1.15032200 | C  | -1.04468500 | 2.81037800  | -0.14231200 |
| C  | -3.03014100 | 3.22111300  | -1.68128900 | C  | 0.41872500  | 2.21220900  | 1.71732800  |
| H  | -3.79838500 | 3.10031500  | -0.91586800 | C  | -1.20001200 | 4.07216800  | 0.44462800  |
| C  | -3.28053400 | 3.99098300  | -2.74167300 | C  | 0.24809200  | 3.47312100  | 2.28370400  |
| H  | -2.53988900 | 4.14285000  | -3.52453800 | H  | 1.04009000  | 1.46480200  | 2.20175900  |
| H  | -4.23610400 | 4.49215500  | -2.87238200 | C  | -0.56262500 | 4.40843600  | 1.63959300  |
| C  | -1.74883500 | 2.46636800  | -1.44592500 | H  | -1.83417100 | 4.80171700  | -0.05119100 |
| H  | -1.96987000 | 1.39050200  | -1.44327300 | H  | 0.74269900  | 3.72130400  | 3.21887900  |
| H  | -1.06089600 | 2.62357400  | -2.28669900 | H  | -0.70494000 | 5.39741600  | 2.06738700  |
| O  | 1.22218600  | 1.12486300  | -2.28244900 | C  | -3.03770500 | -1.14996500 | 1.96336800  |
| O  | 0.57129500  | -1.21013900 | -1.45102000 | O  | -2.50387300 | -0.49816300 | 1.00046400  |
| C  | 2.70483200  | 0.01336900  | -0.42293600 | C  | -4.05219200 | -0.38564900 | 2.79735600  |
| C  | 2.88257200  | -0.83123100 | 0.67911300  | H  | -5.03306100 | -0.86196400 | 2.68914400  |
| C  | 3.77979600  | 0.71525500  | -0.96587600 | H  | -4.11578200 | 0.65994300  | 2.49352400  |
| C  | 4.15116000  | -0.96865100 | 1.23080300  | H  | -3.77341200 | -0.45410200 | 3.85365800  |
| H  | 2.03907000  | -1.36843900 | 1.10074600  | O  | -2.79516900 | -2.34580100 | 2.26905000  |
| C  | 5.04606400  | 0.56566900  | -0.39762800 | Li | -2.34350400 | -3.67342100 | 1.11796600  |

TS-C

# opt=calcfc freq=noraman ub3lyp/genecp gfinput temperature=373.15

- Thermochemistry -

Zero-point correction= 0.392076 (Hartree/Particle)  
 Thermal correction to Energy= 0.438708  
 Thermal correction to Enthalpy= 0.439890  
 Thermal correction to Gibbs Free Energy= 0.296443  
 Sum of electronic and zero-point Energies= -1883.021863  
 Sum of electronic and thermal Energies= -1882.975231  
 Sum of electronic and thermal Enthalpies= -1882.974049  
 Sum of electronic and thermal Free Energies= -1883.117496

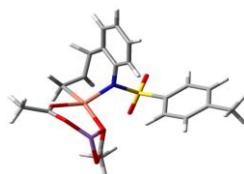

|    |             |             |             |    |             |             |             |
|----|-------------|-------------|-------------|----|-------------|-------------|-------------|
| Cu | -1.67655300 | -0.04013200 | -0.35385800 | H  | 4.08341400  | 0.97864600  | -0.76340300 |
| O  | -3.22280800 | -1.58948300 | 2.19050900  | C  | 4.33220600  | -1.84498600 | 1.15592200  |
| C  | -3.84367900 | -0.68253200 | 1.57769800  | H  | 2.74340000  | -3.28458000 | 1.39844100  |
| C  | -5.19645400 | -0.25371900 | 2.12683900  | H  | 5.68724400  | -0.22917500 | 0.70955000  |
| H  | -5.12088800 | -0.09658800 | 3.20697500  | C  | 5.31157000  | -2.59830300 | 2.02412200  |
| H  | -5.91574700 | -1.06539200 | 1.96659400  | H  | 5.82086800  | -3.38342100 | 1.44962100  |
| H  | -5.56069200 | 0.65042300  | 1.63630700  | H  | 6.08362800  | -1.93536300 | 2.42752200  |
| O  | -3.45503700 | -0.08929100 | 0.51394500  | H  | 4.80832300  | -3.08818600 | 2.86463000  |
| N  | 0.11641900  | 0.92771500  | -0.61630700 | C  | 0.39645500  | 1.92907800  | 0.36507500  |
| S  | 1.40536400  | 0.38395500  | -1.58861500 | C  | 0.05311900  | 3.24268300  | 0.01365200  |
| C  | -1.06172800 | 2.06627300  | -1.87183000 | C  | 0.90090000  | 1.64397600  | 1.63907900  |
| H  | -0.64547500 | 1.67427300  | -2.79542400 | C  | 0.22808700  | 4.27465900  | 0.93360800  |
| C  | -2.35667200 | 1.62554800  | -1.52595000 | C  | 1.08871200  | 2.68658800  | 2.54870200  |
| H  | -2.95453300 | 2.18091000  | -0.80879600 | H  | 1.14488900  | 0.62111900  | 1.90695800  |
| H  | -2.90586600 | 0.99828100  | -2.22687100 | C  | 0.75391700  | 3.99691300  | 2.19882000  |
| C  | -0.49884900 | 3.39202800  | -1.38659100 | H  | -0.04594000 | 5.29267900  | 0.66787300  |
| H  | 0.30031600  | 3.71149900  | -2.06521700 | H  | 1.48468200  | 2.47133200  | 3.53716500  |
| H  | -1.28863900 | 4.15208900  | -1.41504000 | H  | 0.88912100  | 4.80227000  | 2.91531700  |
| O  | 2.12656600  | 1.55265200  | -2.11742100 | C  | -1.49487500 | -3.11548500 | -0.72031900 |
| O  | 0.78890300  | -0.56896000 | -2.52142200 | O  | -1.11416700 | -2.01745600 | -0.13014900 |
| C  | 2.53133200  | -0.48517800 | -0.49664100 | C  | -1.38049000 | -3.20943000 | -2.22458900 |
| C  | 2.13832100  | -1.68561500 | 0.10278000  | H  | -0.48532200 | -2.69098000 | -2.57561300 |
| C  | 3.80368000  | 0.04724800  | -0.28403700 | H  | -2.24864500 | -2.70947900 | -2.67385200 |
| C  | 3.04236800  | -2.35117400 | 0.92697800  | H  | -1.38711400 | -4.25419800 | -2.54149400 |
| H  | 1.13830800  | -2.07432900 | -0.05950300 | O  | -1.96022700 | -4.05670800 | -0.03839500 |
| C  | 4.69438800  | -0.63900500 | 0.54121100  | Li | -2.08858500 | -2.75957700 | 1.39614100  |

I-2C

-----  
 # opt=calcf freq=noraman ub3lyp/genecp ginput temperature=373.15  
 -----

- Thermochemistry -  
 -----

Zero-point correction= 0.393569 (Hartree/Particle)  
 Thermal correction to Energy= 0.440805  
 Thermal correction to Enthalpy= 0.441987  
 Thermal correction to Gibbs Free Energy= 0.293329  
 Sum of electronic and zero-point Energies= -1883.034327  
 Sum of electronic and thermal Energies= -1882.987091  
 Sum of electronic and thermal Enthalpies= -1882.985909  
 Sum of electronic and thermal Free Energies= -1883.134567

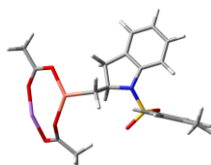

|    |             |             |             |    |             |             |             |
|----|-------------|-------------|-------------|----|-------------|-------------|-------------|
| Cu | -2.80316500 | -0.51391600 | 0.86355600  | H  | 4.74663100  | -0.68050300 | -1.77709300 |
| O  | -5.49017400 | 0.08998600  | 0.22603400  | C  | 5.46020800  | -1.68359300 | 1.41667400  |
| C  | -5.01261700 | 1.06002100  | 0.87911200  | H  | 3.97922700  | -1.91247200 | 2.96972900  |
| C  | -5.91412100 | 2.24079300  | 1.18022700  | H  | 6.66178900  | -1.36743900 | -0.34383600 |
| H  | -5.36326100 | 3.04945700  | 1.66236200  | C  | 6.62146600  | -2.07218900 | 2.30040600  |
| H  | -6.72728700 | 1.91046300  | 1.83628900  | H  | 6.94284100  | -1.22594600 | 2.92193400  |
| H  | -6.37243000 | 2.59645200  | 0.25198700  | H  | 6.35155700  | -2.88788300 | 2.97995800  |
| O  | -3.81284600 | 1.11070500  | 1.31562500  | H  | 7.48535200  | -2.39252500 | 1.70980100  |
| N  | 1.11100800  | 0.70263200  | -0.39976500 | C  | 1.51866900  | 2.06446700  | -0.43108900 |
| S  | 1.93256500  | -0.49992600 | -1.27245900 | C  | 0.40423700  | 2.90991700  | -0.38767800 |
| C  | -0.40462300 | 0.61642100  | -0.33190100 | C  | 2.81714000  | 2.57370800  | -0.44512400 |
| H  | -0.74267600 | 0.07142100  | -1.21537600 | C  | 0.57974200  | 4.28860100  | -0.35343000 |
| C  | -0.82229300 | -0.12017600 | 0.92357500  | C  | 2.97900800  | 3.96244100  | -0.42487100 |
| H  | -0.41762900 | -1.13423000 | 0.97994100  | H  | 3.68086800  | 1.91983300  | -0.47743300 |
| H  | -0.65529700 | 0.45041900  | 1.84241500  | C  | 1.87558300  | 4.81745700  | -0.37535300 |
| C  | -0.87079100 | 2.10145000  | -0.38322700 | H  | -0.28295900 | 4.94953000  | -0.31701600 |
| H  | -1.47040700 | 2.29531100  | -1.28163500 | H  | 3.98326900  | 4.37692100  | -0.44388000 |
| H  | -1.50995300 | 2.32781900  | 0.47719300  | H  | 2.02228900  | 5.89351900  | -0.35450300 |
| O  | 2.49551400  | 0.03307200  | -2.51711800 | C  | -3.35344400 | -2.86775100 | -0.95115800 |
| O  | 1.00379800  | -1.63860100 | -1.30957200 | O  | -3.35665600 | -2.27907600 | 0.21606700  |
| C  | 3.30691800  | -0.91078500 | -0.19724500 | C  | -2.10953500 | -3.61348600 | -1.36521700 |
| C  | 3.07738000  | -1.26185100 | 1.13592900  | H  | -2.25590600 | -4.09469100 | -2.33328700 |
| C  | 4.59216800  | -0.94985100 | -0.73783600 | H  | -1.86954300 | -4.36644500 | -0.60663700 |
| C  | 4.15377500  | -1.64210600 | 1.93114900  | H  | -1.25508600 | -2.92859800 | -1.41625100 |
| H  | 2.07324500  | -1.22601700 | 1.54557200  | O  | -4.37213800 | -2.81471600 | -1.67386400 |
| C  | 5.65908100  | -1.33550800 | 0.07484700  | Li | -5.16621400 | -1.57310600 | -0.43325200 |

I-5 (100 °C)

-----  
 # opt=calcfc freq=noraman ub3lyp/genecp ginput temperature=373.15  
 -----

- Thermochemistry -  
 -----

Zero-point correction= 0.401222 (Hartree/Particle)  
 Thermal correction to Energy= 0.447933  
 Thermal correction to Enthalpy= 0.449115  
 Thermal correction to Gibbs Free Energy= 0.300807  
 Sum of electronic and zero-point Energies= -1876.001939  
 Sum of electronic and thermal Energies= -1875.955228  
 Sum of electronic and thermal Enthalpies= -1875.954046  
 Sum of electronic and thermal Free Energies= -1876.102354

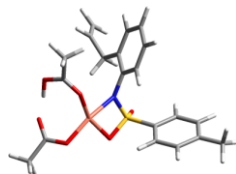

|    |             |             |             |   |             |             |             |
|----|-------------|-------------|-------------|---|-------------|-------------|-------------|
| Cu | -1.10584700 | -1.30008400 | 0.06772200  | H | 3.55111400  | 0.89078000  | -1.62397400 |
| O  | -3.96266400 | 0.02092700  | 1.18562200  | C | 5.12451000  | -1.28952100 | 0.49099300  |
| C  | -2.93867600 | 0.03695800  | 1.98599600  | H | 4.16664000  | -2.99543500 | 1.40110000  |
| C  | -3.10885800 | 0.85131200  | 3.24076000  | H | 5.76880800  | 0.45618700  | -0.59709100 |
| H  | -4.00864700 | 1.46575800  | 3.19029900  | C | 6.46812500  | -1.54543800 | 1.13113400  |
| H  | -2.22244100 | 1.47394400  | 3.38796100  | H | 7.28455900  | -1.13758300 | 0.52665800  |
| H  | -3.18332500 | 0.17002500  | 4.09586500  | H | 6.52734200  | -1.07431800 | 2.12139700  |
| O  | -1.86916200 | -0.57145400 | 1.78312200  | H | 6.64858600  | -2.61655500 | 1.27014500  |
| N  | 0.04779000  | 0.26357300  | -0.24767700 | C | 0.30777200  | 1.51142900  | 0.38514400  |
| S  | 1.00569200  | -0.42587000 | -1.35182000 | C | -0.13084100 | 2.72237400  | -0.19900700 |
| C  | -1.82261900 | 3.87003500  | -1.71086800 | C | 0.95354200  | 1.52402600  | 1.63132000  |
| H  | -2.62813800 | 3.91796700  | -0.97612400 | C | 0.12499700  | 3.91532900  | 0.49037100  |
| C  | -1.77398700 | 4.78282800  | -2.68252600 | C | 1.18609300  | 2.72202700  | 2.30336600  |
| H  | -0.98764300 | 4.77349700  | -3.43481600 | H | 1.26543900  | 0.57744500  | 2.06252400  |
| H  | -2.52285700 | 5.56553300  | -2.77135000 | C | 0.77407200  | 3.92401700  | 1.72528700  |
| C  | -0.84669900 | 2.73578600  | -1.54172200 | H | -0.19972300 | 4.85150900  | 0.04484200  |
| H  | -1.37265000 | 1.77944800  | -1.65685600 | H | 1.68872600  | 2.71617100  | 3.26689900  |
| H  | -0.10747200 | 2.75638700  | -2.35281100 | H | 0.95331000  | 4.86716400  | 2.23493800  |
| O  | 1.23386400  | 0.33751300  | -2.58183100 | C | -3.25388300 | -2.80818400 | -0.54030100 |
| O  | 0.26564700  | -1.75461800 | -1.45016700 | O | -2.07955100 | -2.94491700 | -0.04052300 |
| C  | 2.61754500  | -0.78979200 | -0.65486000 | C | -3.93598600 | -4.08072600 | -0.99867200 |
| C  | 2.78207400  | -1.88963300 | 0.19242100  | H | -5.00333300 | -3.91048300 | -1.14928400 |
| C  | 3.68840000  | 0.05779700  | -0.94319800 | H | -3.77151200 | -4.88167900 | -0.27263400 |
| C  | 4.03276400  | -2.13172200 | 0.75438100  | H | -3.48732200 | -4.39903500 | -1.94687500 |
| H  | 1.95152500  | -2.56146900 | 0.38268500  | O | -3.82739400 | -1.69905100 | -0.69053400 |
| C  | 4.93222200  | -0.19914700 | -0.36791000 | H | -3.83634000 | -0.63964300 | 0.39726500  |

**TS-A (100 °C)**

-----  
 # opt=calcf freq=noraman ub3lyp/genecp ginput temperature=373.15  
 -----

- Thermochemistry -  
 -----

Zero-point correction= 0.400984 (Hartree/Particle)  
 Thermal correction to Energy= 0.446337  
 Thermal correction to Enthalpy= 0.447519  
 Thermal correction to Gibbs Free Energy= 0.305588  
 Sum of electronic and zero-point Energies= -1875.979746  
 Sum of electronic and thermal Energies= -1875.934392  
 Sum of electronic and thermal Enthalpies= -1875.933211  
 Sum of electronic and thermal Free Energies= -1876.075142

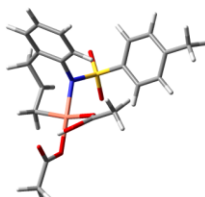

|    |             |             |             |   |             |             |             |
|----|-------------|-------------|-------------|---|-------------|-------------|-------------|
| Cu | -1.65125000 | -0.23486700 | -0.60204000 | H | 3.64899400  | 1.59832400  | -0.45992500 |
| O  | -3.84453400 | -1.27553800 | 1.01469800  | C | 4.52673800  | -1.69497900 | -0.15394400 |
| C  | -4.03310700 | -1.54050300 | -0.20196600 | H | 3.28896700  | -3.34102400 | -0.79497400 |
| C  | -5.34455900 | -2.18479600 | -0.61768200 | H | 5.50459300  | 0.15827700  | 0.35704700  |
| H  | -5.50508600 | -2.10452300 | -1.69436800 | C | 5.67307800  | -2.56871500 | 0.29706700  |
| H  | -6.17144000 | -1.72302300 | -0.07092500 | H | 5.32617000  | -3.56094200 | 0.60350300  |
| H  | -5.32115900 | -3.24563800 | -0.34075900 | H | 6.39795000  | -2.71338400 | -0.51503200 |
| O  | -3.18245500 | -1.31613800 | -1.12997100 | H | 6.21301600  | -2.12024500 | 1.13759400  |
| N  | -0.08545900 | 1.06687900  | -0.45238700 | C | 0.21299900  | 1.68812100  | 0.79505900  |
| S  | 1.10788400  | 0.97310300  | -1.65799400 | C | -0.36318000 | 2.95155900  | 0.98702400  |
| C  | -1.48294300 | 2.36024000  | -1.17339000 | C | 0.94748100  | 1.07985200  | 1.82015900  |
| H  | -1.04353000 | 2.46608900  | -2.16075700 | C | -0.18811700 | 3.61560800  | 2.20068100  |
| C  | -2.66717500 | 1.59032300  | -1.10091600 | C | 1.13268400  | 1.76036800  | 3.02451400  |
| H  | -3.33608200 | 1.70893300  | -0.25003800 | H | 1.36163900  | 0.08939300  | 1.66917200  |
| H  | -3.11499000 | 1.22890200  | -2.02222500 | C | 0.56817200  | 3.02434800  | 3.21549900  |
| C  | -1.15952700 | 3.47508900  | -0.18806700 | H | -0.64059900 | 4.59199400  | 2.35604900  |
| H  | -0.58484500 | 4.25159200  | -0.70791700 | H | 1.70829800  | 1.29617500  | 3.82059800  |
| H  | -2.09391400 | 3.93389500  | 0.15648100  | H | 0.70539700  | 3.54439100  | 4.15941700  |
| O  | 1.67737700  | 2.31196100  | -1.87205500 | C | -0.73613200 | -2.41261200 | 1.43172000  |
| O  | 0.42586800  | 0.26870600  | -2.75486600 | O | -0.55662100 | -1.78274300 | 0.37966500  |
| C  | 2.43000900  | -0.07388000 | -1.05105400 | C | 0.33787300  | -3.30338900 | 2.00752700  |
| C  | 2.31600200  | -1.46203900 | -1.15579300 | H | 0.03298700  | -4.35021500 | 1.89632800  |
| C  | 3.57436200  | 0.51774600  | -0.51107200 | H | 0.45078000  | -3.10995000 | 3.07834200  |
| C  | 3.36645400  | -2.25997300 | -0.70569600 | H | 1.28236800  | -3.14167400 | 1.48687400  |
| H  | 1.42481100  | -1.90466800 | -1.58434600 | O | -1.83528100 | -2.39431900 | 2.13916600  |
| C  | 4.61153200  | -0.29802600 | -0.06289000 | H | -2.58670800 | -1.86081700 | 1.67984700  |



### I-6 (100 °C)

# opt=calcf freq=noraman ub3lyp/genecp gfinput temperature=373.15

- Thermochemistry -

Zero-point correction= 0.403376 (Hartree/Particle)  
Thermal correction to Energy= 0.449242  
Thermal correction to Enthalpy= 0.450424  
Thermal correction to Gibbs Free Energy= 0.304333  
Sum of electronic and zero-point Energies= -1875.989313  
Sum of electronic and thermal Energies= -1875.943446  
Sum of electronic and thermal Enthalpies= -1875.942264  
Sum of electronic and thermal Free Energies= -1876.088356

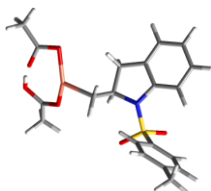

|    |             |             |             |   |             |             |             |
|----|-------------|-------------|-------------|---|-------------|-------------|-------------|
| Cu | -2.77557900 | -0.41551800 | 0.72540600  | H | 4.93720800  | -0.84859200 | -1.58757000 |
| O  | -4.85344500 | -0.47485500 | 1.20777400  | C | 5.33564200  | -1.84255600 | 1.66329300  |
| C  | -4.70623300 | 0.65675200  | 1.80164000  | H | 3.71434000  | -2.02490700 | 3.07669200  |
| C  | -5.90715900 | 1.33464600  | 2.41243800  | H | 6.69992200  | -1.56260700 | 0.01992000  |
| H  | -5.64383800 | 2.32165200  | 2.79536900  | C | 6.40004000  | -2.25694200 | 2.65144800  |
| H  | -6.29135600 | 0.71457000  | 3.23001800  | H | 6.57340200  | -1.47155900 | 3.39858500  |
| H  | -6.70441200 | 1.41906600  | 1.66699500  | H | 6.10725500  | -3.16119100 | 3.19746800  |
| O  | -3.55658000 | 1.16951500  | 1.88455100  | H | 7.35377800  | -2.45616700 | 2.15327200  |
| N  | 1.19924800  | 0.58583100  | -0.55675500 | C | 1.60139400  | 1.94659500  | -0.56347400 |
| S  | 2.09145500  | -0.61631800 | -1.34868100 | C | 0.48176900  | 2.78645900  | -0.55282700 |
| C  | -0.31806900 | 0.48183500  | -0.53057300 | C | 2.89647800  | 2.46503800  | -0.53161400 |
| H  | -0.62987600 | -0.06481600 | -1.42186500 | C | 0.64688200  | 4.16579900  | -0.50609100 |
| C  | -0.78820100 | -0.25755300 | 0.70491300  | C | 3.04850700  | 3.85459200  | -0.49799000 |
| H  | -0.45987800 | -1.30195100 | 0.71421100  | H | 3.76496600  | 1.81698700  | -0.54163600 |
| H  | -0.53135800 | 0.26165000  | 1.63474000  | C | 1.93925300  | 4.70329500  | -0.48147900 |
| C  | -0.78655900 | 1.96855800  | -0.58799600 | H | -0.22112800 | 4.82081700  | -0.49406600 |
| H  | -1.36556100 | 2.16458400  | -1.49998200 | H | 4.05047700  | 4.27495100  | -0.48087800 |
| H  | -1.44195600 | 2.19239800  | 0.26188700  | H | 2.07853000  | 5.78015100  | -0.45004900 |
| O  | 2.78113100  | -0.07135000 | -2.52337000 | C | -4.07788100 | -1.93297400 | -1.54157700 |
| O  | 1.17196300  | -1.75106000 | -1.48849400 | O | -3.03072700 | -1.58990700 | -0.97597200 |
| C  | 3.35505000  | -1.04025400 | -0.14675600 | C | -4.06234300 | -2.74940700 | -2.80476800 |
| C  | 2.99794300  | -1.37446800 | 1.16272200  | H | -4.72345700 | -2.29879700 | -3.55096600 |
| C  | 4.68313100  | -1.10860400 | -0.56568100 | H | -4.44866600 | -3.75179700 | -2.58808200 |
| C  | 3.98856300  | -1.76889200 | 2.05596700  | H | -3.04460100 | -2.82474900 | -3.18769200 |
| H  | 1.96140200  | -1.31252100 | 1.47761800  | O | -5.28805500 | -1.64149400 | -1.11156100 |
| C  | 5.66363700  | -1.50881900 | 0.34402500  | H | -5.24676300 | -1.14225700 | -0.24173600 |

**I-2G**

-----  
# opt=(calcfc,ts,noeigen) freq=noraman ub3lyp/genecp gfinput temperature=383.15  
-----

-----  
- Thermochemistry -  
-----

Zero-point correction= 0.284514 (Hartree/Particle)  
Thermal correction to Energy= 0.314461  
Thermal correction to Enthalpy= 0.315674  
Thermal correction to Gibbs Free Energy= 0.211669  
Sum of electronic and zero-point Energies= -1222.289768  
Sum of electronic and thermal Energies= -1222.259821  
Sum of electronic and thermal Enthalpies= -1222.258608  
Sum of electronic and thermal Free Energies= -1222.362613

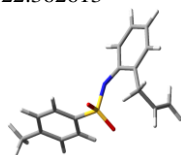

|   |             |             |             |   |             |             |             |
|---|-------------|-------------|-------------|---|-------------|-------------|-------------|
| N | 0.42186300  | 0.60210700  | -0.11454000 | C | -4.71314100 | 0.43688600  | -0.29588900 |
| S | -0.35378800 | -0.76022800 | 0.48125300  | H | -4.45030800 | -0.53189900 | -2.20416100 |
| C | 3.03534900  | -2.29379200 | -0.32826600 | H | -4.63910200 | 1.30785200  | 1.67535400  |
| H | 2.77219700  | -3.31615800 | -0.06090400 | C | -6.15995700 | 0.79794500  | -0.53701500 |
| C | 3.48565300  | -2.03858900 | -1.55627800 | H | -6.43575500 | 1.72008900  | -0.01472100 |
| H | 3.75159300  | -1.03767200 | -1.88565100 | H | -6.36683300 | 0.93527000  | -1.60346700 |
| H | 3.59140000  | -2.83415400 | -2.28837300 | H | -6.82882400 | 0.00593500  | -0.17449900 |
| C | 2.85681200  | -1.29769700 | 0.80381200  | C | 1.73408400  | 0.91482600  | -0.06843200 |
| H | 1.94612800  | -1.53557400 | 1.35544300  | C | 2.88561500  | 0.15116700  | 0.37645100  |
| H | 3.67337400  | -1.45218500 | 1.52494300  | C | 1.95881200  | 2.25723600  | -0.54354100 |
| O | -0.17190500 | -0.83916000 | 1.94209700  | C | 4.12639500  | 0.78661600  | 0.35059400  |
| O | -0.06097300 | -1.93145500 | -0.35812700 | C | 3.20702200  | 2.84014800  | -0.55486500 |
| C | -2.05058800 | -0.28092700 | 0.17416900  | H | 1.07884200  | 2.79622700  | -0.87747900 |
| C | -2.65175700 | -0.62896700 | -1.03561300 | C | 4.30758600  | 2.10071100  | -0.09627800 |
| C | -2.75831200 | 0.41148400  | 1.15707400  | H | 4.99345600  | 0.22341700  | 0.68608700  |
| C | -3.97754400 | -0.26401800 | -1.26234300 | H | 3.33417100  | 3.85866900  | -0.90954000 |
| H | -2.08974800 | -1.18427900 | -1.77893700 | H | 5.30146700  | 2.53919200  | -0.09103600 |
| C | -4.08324100 | 0.76752400  | 0.91280200  |   |             |             |             |
| H | -2.27819400 | 0.65576300  | 2.09861000  |   |             |             |             |

## TS-G

-----  
# opt=(calcfc,ts,noeigen) freq=noraman ub3lyp/genecp gfinput temperature=383.15  
-----

-----  
- Thermochemistry -  
-----

Zero-point correction= 0.283624 (Hartree/Particle)  
Thermal correction to Energy= 0.312508  
Thermal correction to Enthalpy= 0.313721  
Thermal correction to Gibbs Free Energy= 0.213683  
Sum of electronic and zero-point Energies= -1222.270042  
Sum of electronic and thermal Energies= -1222.241159  
Sum of electronic and thermal Enthalpies= -1222.239945  
Sum of electronic and thermal Free Energies= -1222.339984

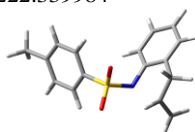

|   |             |             |             |
|---|-------------|-------------|-------------|
| N | 0.95199400  | -0.64207400 | -0.66760500 |
| S | 0.01566000  | -1.37529300 | 0.56928700  |
| C | 2.86317000  | -1.64730600 | -0.34954300 |
| H | 2.40679200  | -2.48492200 | 0.16930300  |
| C | 3.23345800  | -1.84955900 | -1.66045500 |
| H | 3.81436100  | -1.11118000 | -2.20780900 |
| H | 2.87774200  | -2.71387800 | -2.21161200 |
| C | 3.43465900  | -0.51944700 | 0.48937300  |
| H | 3.30006000  | -0.75622500 | 1.55113300  |
| H | 4.51255900  | -0.42425800 | 0.30881500  |
| O | 0.45717300  | -0.97262500 | 1.91593900  |
| O | -0.05154100 | -2.79981900 | 0.21955700  |
| C | -1.59118800 | -0.64195900 | 0.26957200  |
| C | -2.35601400 | -1.08684700 | -0.81331900 |
| C | -2.06021600 | 0.35815700  | 1.12172300  |
| C | -3.60477900 | -0.51543200 | -1.03739400 |
| H | -1.97626900 | -1.87312600 | -1.45702500 |
| C | -3.31618200 | 0.91598700  | 0.88243200  |
| H | -1.45065700 | 0.67940000  | 1.95932400  |
| C | -4.10548900 | 0.49115500  | -0.19496700 |
| H | -4.20550400 | -0.85807100 | -1.87654700 |
| H | -3.68940600 | 1.69240500  | 1.54569900  |
| C | -5.47611900 | 1.07896200  | -0.43310600 |
| H | -5.59043200 | 2.04641800  | 0.06568200  |
| H | -5.67133800 | 1.22058000  | -1.50182100 |
| H | -6.26053900 | 0.41479300  | -0.04668800 |
| C | 1.44666100  | 0.65949600  | -0.38924500 |
| C | 2.73204700  | 0.78361700  | 0.16455800  |
| C | 0.72155200  | 1.80557800  | -0.74573500 |
| C | 3.27646700  | 2.05051100  | 0.36940400  |
| C | 1.26992300  | 3.06813300  | -0.51615000 |
| H | -0.25710300 | 1.69701800  | -1.20107200 |
| C | 2.54430600  | 3.19423100  | 0.04060500  |
| H | 4.27725200  | 2.14499300  | 0.78460100  |
| H | 0.70459900  | 3.95471200  | -0.79064100 |
| H | 2.97476300  | 4.17844000  | 0.20280400  |

## 9. Theoretical Section Supporting Information References

- (1) AIM analyses were performed on the three ground state structures in Fig. 8. In each, a bond critical point (3,-1) was located between the sulfonamide oxygen and Cu, which is indicative of the existence of a bond. Furthermore, a ring critical point (3,+1) was present in each ground state structure at the center of the Cu-O-S-N ring.
- (2) (a) Bader, R. F. W. *Atoms in Molecules*; Clarendon Press: Oxford, 1990; (b) Bader, R. F. W. *Chem. Rev.* **1991**, *91*, 893-928.
- (3) Liu, X.; Kilner, C. A.; Thornton-Pett, M.; Halcrow, M. A. *Acta Cryst.* **2001**, *C57*, 1253-1255.
- (4) Goj, L. A.; Blue, E. D.; Delp, S. A.; Gunnoe, T. B.; Cundari, T. R.; Petersen, J. L. *Organometallics*, **2006**, *25*, 4097-4101.
- (5) See figure 7 in Zurek, E.; Ziegler, T. *Organometallics*, **2002**, *21*, 83-92.
- (6) Zurek, E.; Ziegler, T. *Faraday Discuss.* **2003**, *124*, 93-109.
- (7) Xu, Z.; Vanka, K.; Firman, T.; Michalak, A.; Zurek, E.; Zhu, C.; Ziegler, T. *Organometallics*, **2002**, *21*, 2444-2453.
- (8) Sherman, E. S.; Chemler, S. R.; Tan, T. B.; Gerlits, O. *Org. Lett.* **2004**, *6*, 1573-1575.
